# Supplementary material for: Alteration of Protein Levels during Influenza Virus H1N1 Infection in Host Cells: A Proteomic Survey of Host and Virus Reveals Differential Dynamics
Source: PubMed Central journal article supplement (PMC3981805; doi:10.1371/journal.pone.0094257), 2014-04-09
Supplement: pone.0094257.s003.pdf [file pone.0094257.s003.pdf]

(Excess Monophosphate Shunt or Phosphogluconate Pathway)

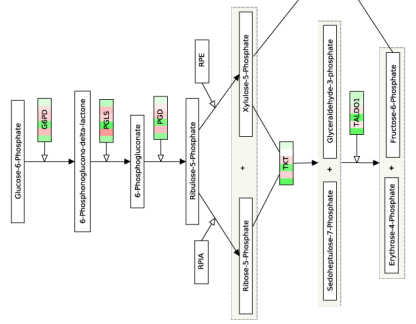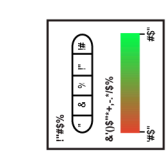

Nucleotide Biosynthesis

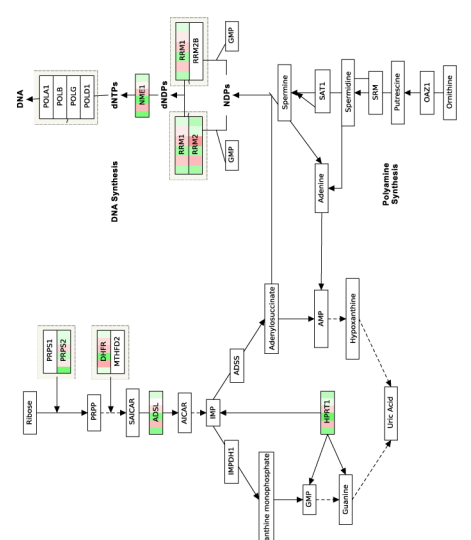

Glycolysis  
↓  
Gluconeogenesis

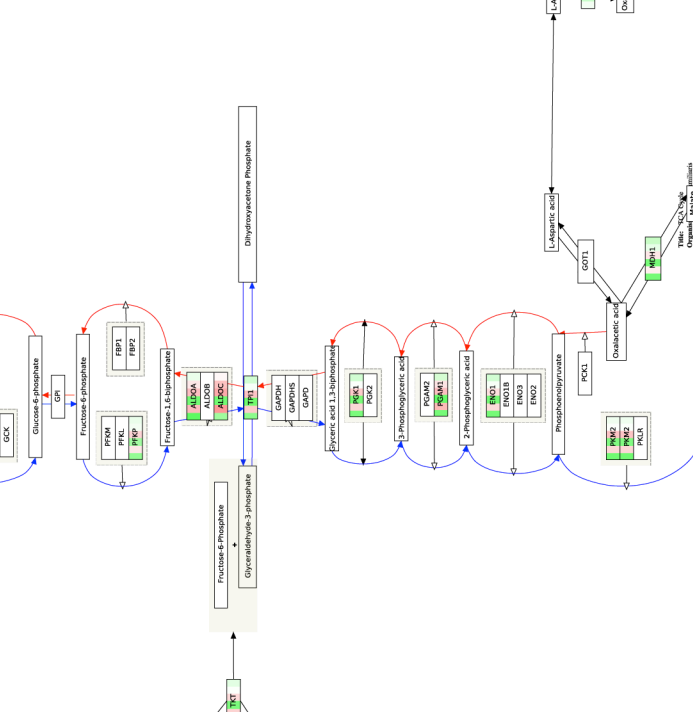

Glyoxylate

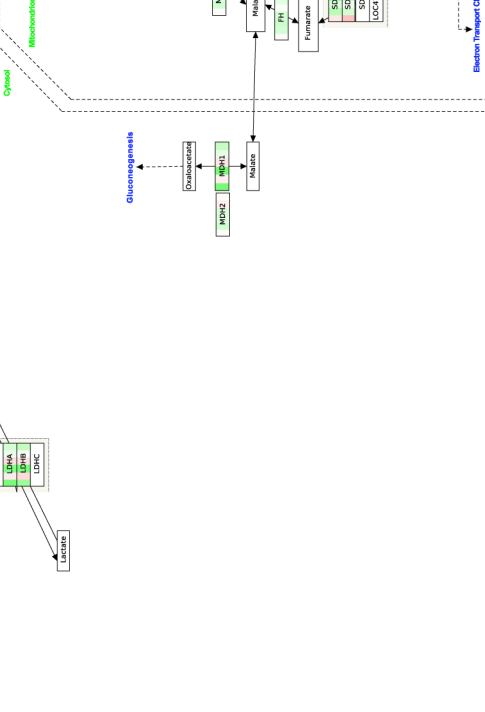

Cyoxol

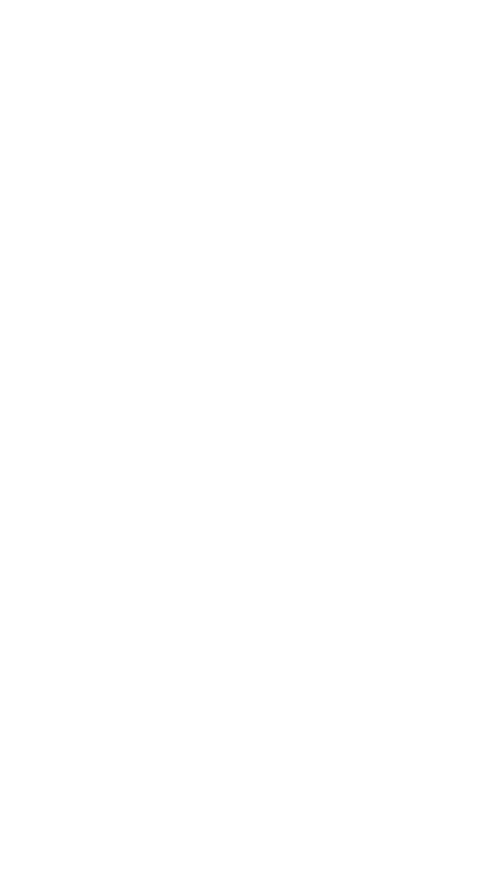

Gluconeogenesis

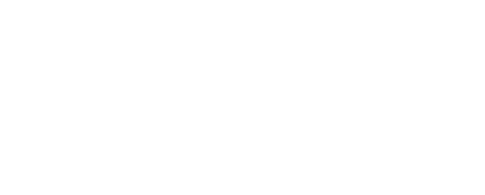

Degradation of Fatty Acids Containing an Odd Number of Carbons

Degradation of Fatty Acids Containing an Odd Number of Carbons

Degradation of Fatty Acids Containing an Odd Number of Carbons

Degradation of Fatty Acids Containing an Odd Number of Carbons
