# Supplementary material for: Alteration of Protein Levels during Influenza Virus H1N1 Infection in Host Cells: A Proteomic Survey of Host and Virus Reveals Differential Dynamics
Source: PubMed Central journal article supplement (PMC3981805; doi:10.1371/journal.pone.0094257), 2014-04-09

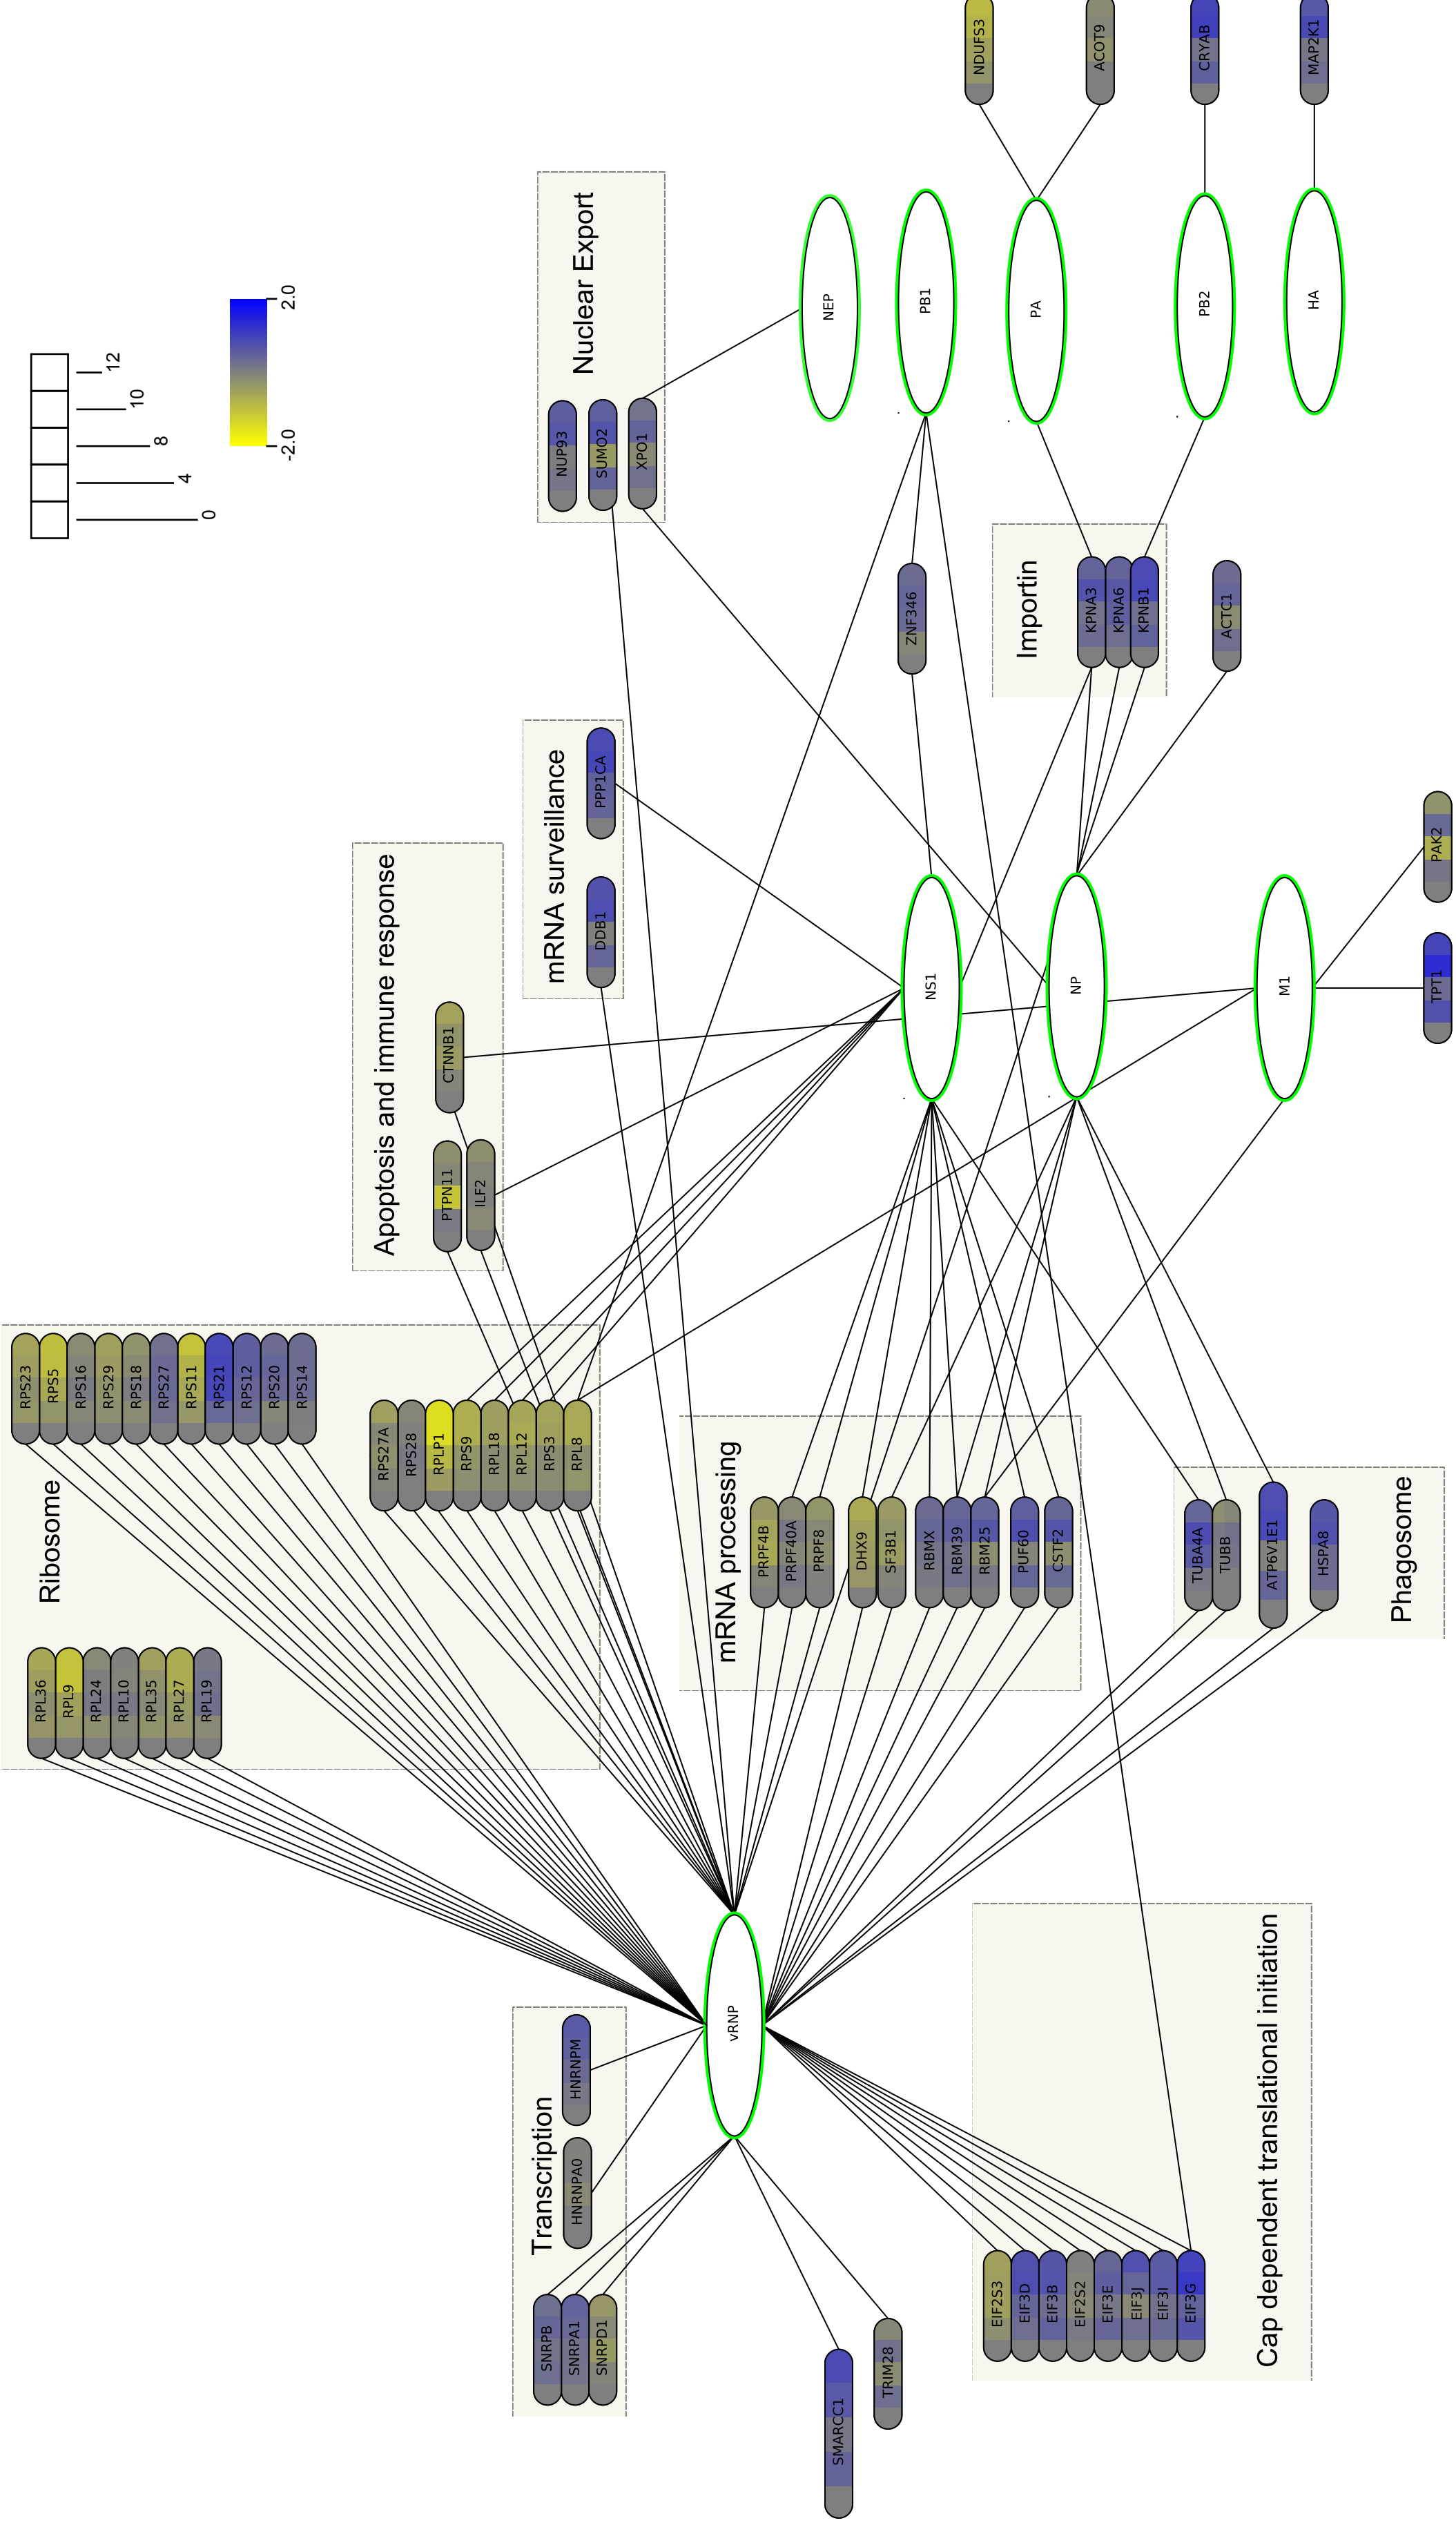

Supplement: pone.0094257.s004.pdf [file pone.0094257.s004.pdf]
