# Supplementary material for: Alteration of Protein Levels during Influenza Virus H1N1 Infection in Host Cells: A Proteomic Survey of Host and Virus Reveals Differential Dynamics
Source: PubMed Central journal article supplement (PMC3981805; doi:10.1371/journal.pone.0094257), 2014-04-09
Supplement: pone.0094257.s005.pdf [file pone.0094257.s005.pdf]

**Table S1:** List of viral (green) and cellular (blue) proteins with their changes over time.

| Symbol | log2 fold change |            |             |             | Name |
|--------|------------------|------------|-------------|-------------|------|
|        | 4hrs p.i.        | 8 hrs p.i. | 10 hrs p.i. | 12 hrs p.i. |      |
| P03428 | -1,39            | 0,52       | 1,74        | 2,01        | PB2  |
| P03431 | -0,86            | 0,68       | 1,91        | 2,33        | PB1  |
| P03433 | -0,60            | 1,37       | 2,48        | 2,72        | PA   |
| P03452 | -1,32            | 2,21       | 3,73        | 4,10        | HA   |
| P03466 | -1,47            | 2,86       | 4,37        | 4,83        | NP   |
| P03468 | -1,80            | 0,70       | 2,38        | 3,07        | NA   |
| P03485 | -1,96            | 2,37       | 4,33        | 4,88        | M    |
| P03496 | -0,45            | 3,63       | 5,04        | 5,59        | NS1  |
| P03508 | -0,27            | 0,75       | 2,48        | 2,38        | NS2  |

  

| Symbol    | Entrez Id | log2 fold change |            |             |             | Name                                                                                                                                                                            |
|-----------|-----------|------------------|------------|-------------|-------------|---------------------------------------------------------------------------------------------------------------------------------------------------------------------------------|
|           |           | 4hrs p.i.        | 8 hrs p.i. | 10 hrs p.i. | 12 hrs p.i. |                                                                                                                                                                                 |
| LOC611024 | 611024    | -2,14            | -1,87      | -1,99       | -2,40       | similar to 3-beta-hydroxysteroid-delta(8),delta(7)-isomerase (Cholestenol delta-isomerase) (Delta8-delta7 sterol isomerase) (D8-D7 sterol isomerase) (Emopamil-binding protein) |
| RPLP1     | 478356    | -1,25            | -0,90      | -1,74       | -1,50       | ribosomal protein, large, P1                                                                                                                                                    |
| SFXN1     | 489109    | -1,47            | -1,40      | -1,55       | -1,67       | sideroflexin 1                                                                                                                                                                  |
| ELOVL1    | 482533    | -1,29            | -1,15      | -1,49       | -1,49       | ELOVL fatty acid elongase 1                                                                                                                                                     |
| LOC478576 | 478576    | -0,79            | -0,71      | -1,45       | -1,22       | similar to ribosomal protein S15a                                                                                                                                               |
| PGRMC2    | 476084    | -1,09            | -0,93      | -1,44       | -2,05       | progesterone receptor membrane component 2                                                                                                                                      |
| RPL9      | 479109    | -0,83            | -0,53      | -1,44       | -1,06       | ribosomal protein L9                                                                                                                                                            |
| LOC477944 | 477944    | -0,81            | -0,74      | -1,44       | -1,09       | similar to ubiquinol-cytochrome c reductase binding protein                                                                                                                     |
| RPLP2     | 475991    | -0,90            | -0,59      | -1,42       | -0,99       | ribosomal protein, large, P2                                                                                                                                                    |
| TIMM23    | 486776    | -1,17            | -0,87      | -1,42       | -1,40       | translocase of inner mitochondrial membrane 23 homolog (yeast)                                                                                                                  |
| SSR1      | 403951    | -1,22            | -1,24      | -1,42       | -1,33       | signal sequence receptor, alpha                                                                                                                                                 |
| LOC481543 | 481543    | -0,82            | -0,68      | -1,40       | -1,05       | similar to ribosomal protein L31                                                                                                                                                |
| RPS2      | 479886    | -0,81            | -0,65      | -1,39       | -1,17       | ribosomal protein S2                                                                                                                                                            |
| ATP1B1    | 403966    | -1,34            | -1,17      | -1,35       | -1,55       | ATPase, Na <sup>+</sup> /K <sup>+</sup> transporting, beta 1 polypeptide                                                                                                        |
| SQLE      | 608021    | -0,95            | -0,99      | -1,35       | -1,74       | squalene epoxidase                                                                                                                                                              |
| FDFT1     | 477362    | -1,29            | -1,04      | -1,33       | -1,74       | farnesyl-diphosphate farnesyltransferase 1                                                                                                                                      |
| TMX1      | 610791    | -1,17            | -1,13      | -1,33       | -1,41       | thioredoxin-related transmembrane protein 1                                                                                                                                     |
| RPL30     | 480751    | -0,62            | -0,51      | -1,29       | -0,90       | ribosomal protein L30                                                                                                                                                           |
| LOC479623 | 479623    | -1,19            | -1,14      | -1,29       | -1,42       | similar to Cytochrome c oxidase subunit IV isoform 1, mitochondrial precursor (COX IV-1) (Cytochrome c oxidase polypeptide IV)                                                  |
| SPTLC1    | 484192    | -1,12            | -1,23      | -1,28       | -1,56       | serine palmitoyltransferase, long chain base subunit 1                                                                                                                          |
| TRPV4     | 486308    | -1,01            | -0,77      | -1,27       | -1,64       | transient receptor potential cation channel, subfamily V, member 4                                                                                                              |
| LOC611134 | 611134    | -1,12            | -1,09      | -1,25       | -1,49       | similar to cytochrome c oxidase, subunit 7a 3                                                                                                                                   |
| LOC488258 | 488258    | -1,14            | -1,20      | -1,25       | -1,63       | similar to Histone H1.2 (H1d)                                                                                                                                                   |

| Symbol           | Entrez Id | log2 fold change |            |             |             | Name                                                                                        |
|------------------|-----------|------------------|------------|-------------|-------------|---------------------------------------------------------------------------------------------|
|                  |           | 4hrs p.i.        | 8 hrs p.i. | 10 hrs p.i. | 12 hrs p.i. |                                                                                             |
| <b>LOC476758</b> | 476758    | -1,37            | -1,04      | -1,25       | -1,51       | similar to basigin isoform 1                                                                |
| <b>ATP5F1</b>    | 479901    | -1,04            | -0,89      | -1,24       | -1,18       | ATP synthase, H <sup>+</sup> transporting, mitochondrial Fo complex, subunit B1             |
| <b>VDAC1</b>     | 474681    | -1,03            | -0,90      | -1,24       | -1,20       | voltage-dependent anion channel 1                                                           |
| <b>SLC25A4</b>   | 475630    | -0,91            | -1,00      | -1,24       | -1,20       | solute carrier family 25 (mitochondrial carrier; adenine nucleotide translocator), member 4 |
| <b>GNAI2</b>     | 442957    | -0,92            | -0,75      | -1,24       | -1,18       | guanine nucleotide binding protein (G protein), alpha inhibiting activity polypeptide 2     |
| <b>NOP2</b>      | 611645    | -0,98            | -0,60      | -1,23       | -1,21       | NOP2 nucleolar protein homolog (yeast)                                                      |
| <b>VDAC2</b>     | 479255    | -1,05            | -0,87      | -1,23       | -1,14       | voltage-dependent anion channel 2                                                           |
| <b>NDUFA5</b>    | 475214    | -0,94            | -1,09      | -1,22       | -1,43       | NADH dehydrogenase (ubiquinone) 1 alpha subcomplex, 5, 13kDa                                |
| <b>LOC610942</b> | 610942    | -0,90            | -0,87      | -1,22       | -1,23       | similar to cytochrome b5 outer mitochondrial membrane precursor                             |
| <b>FAF2</b>      | 489102    | -1,25            | -1,05      | -1,21       | -1,14       | Fas associated factor family member 2                                                       |
| <b>RPS11</b>     | 403684    | -0,62            | -0,64      | -1,20       | -1,06       | ribosomal protein S11                                                                       |
| <b>STT3A</b>     | 489300    | -0,87            | -0,53      | -1,19       | -1,09       | STT3, subunit of the oligosaccharyltransferase complex, homolog A ( <i>S. cerevisiae</i> )  |
| <b>LOC477031</b> | 477031    | -0,77            | -0,58      | -1,19       | -1,06       | similar to ribosomal protein L14                                                            |
| <b>CANX</b>      | 403908    | -1,07            | -0,99      | -1,19       | -1,30       | calnexin                                                                                    |
| <b>RPS5</b>      | 476366    | -0,83            | -0,66      | -1,19       | -1,00       | ribosomal protein S5                                                                        |
| <b>LARP1</b>     | 612929    | -0,68            | -0,74      | -1,18       | -1,09       | La ribonucleoprotein domain family, member 1                                                |
| <b>AGK</b>       | 482764    | -1,20            | -1,05      | -1,17       | -1,36       | acylglycerol kinase                                                                         |
| <b>TOMM40</b>    | 611055    | -1,13            | -1,05      | -1,17       | -1,33       | translocase of outer mitochondrial membrane 40 homolog (yeast)                              |
| <b>RPS25</b>     | 479412    | -0,62            | -0,53      | -1,16       | -0,86       | ribosomal protein S25                                                                       |
| <b>SSR3</b>      | 477124    | -1,10            | -0,77      | -1,16       | -1,32       | signal sequence receptor, gamma (translocon-associated protein gamma)                       |
| <b>LOC476637</b> | 476637    | -0,55            | -0,39      | -1,16       | -0,79       | similar to ribosomal protein L18a                                                           |
| <b>RPL6</b>      | 403691    | -0,65            | -0,46      | -1,16       | -0,91       | Ribosomal protein L6                                                                        |
| <b>CPT1A</b>     | 403583    | -1,16            | -0,90      | -1,15       | -1,33       | carnitine palmitoyltransferase 1A (liver)                                                   |
| <b>AGPS</b>      | 488421    | -0,92            | -0,92      | -1,15       | -1,01       | alkylglycerone phosphate synthase                                                           |
| <b>RPL15</b>     | 477046    | -0,60            | -0,37      | -1,14       | -0,82       | ribosomal protein L15                                                                       |
| <b>YBX1</b>      | 479011    | -0,56            | -0,48      | -1,14       | -0,93       | Y box binding protein 1                                                                     |
| <b>RPS8</b>      | 475381    | -0,63            | -0,47      | -1,14       | -0,80       | ribosomal protein S8                                                                        |
| <b>CISD2</b>     | 610084    | -1,02            | -1,04      | -1,14       | -1,22       | CDGSH iron sulfur domain 2                                                                  |
| <b>RPN1</b>      | 476516    | -1,07            | -0,85      | -1,13       | -1,13       | ribophorin I                                                                                |
| <b>RRP12</b>     | 608725    | -1,14            | -0,57      | -1,13       | -1,27       | ribosomal RNA processing 12 homolog ( <i>S. cerevisiae</i> )                                |
| <b>SLC3A2</b>    | 483777    | -1,03            | -0,78      | -1,12       | -1,21       | solute carrier family 3 (activators of dibasic and neutral amino acid transport), member 2  |
| <b>UBTF</b>      | 480503    | -0,52            | -0,34      | -1,12       | -1,34       | upstream binding transcription factor, RNA polymerase I                                     |
| <b>LOC488273</b> | 488273    | -0,81            | -0,82      | -1,12       | -1,28       | similar to Histone H1.5 (Histone H1a)                                                       |
| <b>LOC489372</b> | 489372    | -1,22            | -1,07      | -1,11       | -1,20       | similar to Histone H2A.x                                                                    |

| Symbol           | Entrez Id | log2 fold change |            |             |             | Name                                                                                                                                          |
|------------------|-----------|------------------|------------|-------------|-------------|-----------------------------------------------------------------------------------------------------------------------------------------------|
|                  |           | 4hrs p.i.        | 8 hrs p.i. | 10 hrs p.i. | 12 hrs p.i. |                                                                                                                                               |
|                  |           |                  |            |             |             | (H2a/x)                                                                                                                                       |
| <b>GPD2</b>      | 478755    | -0,97            | -0,86      | -1,11       | -1,22       | glycerol-3-phosphate dehydrogenase 2 (mitochondrial)                                                                                          |
| <b>RPN2</b>      | 477223    | -1,10            | -0,78      | -1,11       | -1,05       | ribophorin II                                                                                                                                 |
| <b>SPTLC2</b>    | 480403    | -0,67            | -0,86      | -1,10       | -1,18       | serine palmitoyltransferase, long chain base subunit 2                                                                                        |
| <b>RPS9</b>      | 476387    | -0,49            | -0,35      | -1,10       | -0,74       | ribosomal protein S9                                                                                                                          |
| <b>RPL35A</b>    | 478597    | -0,57            | -0,45      | -1,09       | -0,79       | ribosomal protein L35a                                                                                                                        |
| <b>RPL7</b>      | 477912    | -0,55            | -0,40      | -1,09       | -0,80       | ribosomal protein L7                                                                                                                          |
| <b>CAV1</b>      | 403980    | -0,80            | -1,05      | -1,06       | -1,35       | caveolin 1, caveolae protein, 22kDa                                                                                                           |
| <b>TMEM43</b>    | 484637    | -0,75            | -0,82      | -1,06       | -1,02       | transmembrane protein 43                                                                                                                      |
| <b>NDUFA10</b>   | 608244    | -1,08            | -1,01      | -1,06       | -1,17       | NADH dehydrogenase (ubiquinone) 1 alpha subcomplex, 10, 42kDa                                                                                 |
| <b>RPL7A</b>     | 403678    | -0,57            | -0,44      | -1,05       | -0,88       | Ribosomal protein L7a                                                                                                                         |
| <b>TIMM50</b>    | 476461    | -1,09            | -1,04      | -1,05       | -1,25       | translocase of inner mitochondrial membrane 50 homolog (S. cerevisiae)                                                                        |
| <b>RPS4Y1</b>    | 403893    | -0,62            | -0,47      | -1,05       | -0,82       | ribosomal protein S4, Y-linked 1                                                                                                              |
| <b>IMMT</b>      | 475764    | -0,91            | -0,78      | -1,04       | -1,10       | inner membrane protein, mitochondrial                                                                                                         |
| <b>VDAC3</b>     | 475462    | -0,70            | -0,70      | -1,02       | -0,94       | voltage-dependent anion channel 3                                                                                                             |
| <b>CYP1B1</b>    | 483038    | -0,49            | -0,60      | -1,02       | -1,30       | cytochrome P450, family 1, subfamily B, polypeptide 1                                                                                         |
| <b>LOC474504</b> | 474504    | -0,47            | -0,31      | -1,02       | -0,66       | similar to 60S ribosomal protein L3 (L4)                                                                                                      |
| <b>ERLIN2</b>    | 607518    | -0,89            | -0,81      | -1,01       | -1,05       | ER lipid raft associated 2                                                                                                                    |
| <b>FLT3LG</b>    | 442938    | -0,47            | -0,38      | -1,01       | -0,65       | fms-related tyrosine kinase 3 ligand                                                                                                          |
| <b>LOC475225</b> | 475225    | -0,82            | -0,81      | -1,00       | -1,15       | similar to Cytochrome P450 51A1 (CYPL1) (P450LI) (Sterol 14-alpha demethylase) (Lanosterol 14-alpha demethylase) (LDM) (P450-14DM) (P45014DM) |
| <b>RPS15</b>     | 476753    | -0,57            | -0,44      | -1,00       | -0,89       | ribosomal protein S15                                                                                                                         |
| <b>OCIAD1</b>    | 475140    | -1,02            | -1,03      | -0,99       | -1,26       | OCIA domain containing 1                                                                                                                      |
| <b>RPL8</b>      | 475130    | -0,51            | -0,25      | -0,99       | -0,64       | ribosomal protein L8                                                                                                                          |
| <b>ITGB1</b>     | 477956    | -0,69            | -0,62      | -0,99       | -0,99       | integrin, beta 1 (fibronectin receptor, beta polypeptide, antigen CD29 includes MDF2, MSK12)                                                  |
| <b>SLC25A6</b>   | 480830    | -0,65            | -0,73      | -0,99       | -0,88       | solute carrier family 25 (mitochondrial carrier; adenine nucleotide translocator), member 6                                                   |
| <b>LETM1</b>     | 488807    | -0,85            | -0,86      | -0,98       | -0,83       | leucine zipper-EF-hand containing transmembrane protein 1                                                                                     |
| <b>ETFDH</b>     | 475480    | -0,81            | -0,84      | -0,98       | -1,19       | electron-transferring-flavoprotein dehydrogenase                                                                                              |
| <b>SLC4A7</b>    | 485637    | -1,15            | -0,80      | -0,97       | -1,07       | solute carrier family 4, sodium bicarbonate cotransporter, member 7                                                                           |
| <b>PODXL</b>     | 482252    | -0,80            | -0,89      | -0,97       | -1,21       | podocalyxin-like                                                                                                                              |
| <b>LOC474656</b> | 474656    | -0,38            | -0,25      | -0,97       | -0,65       | similar to ribosomal protein L10a                                                                                                             |
| <b>LOC480235</b> | 480235    | -0,47            | -0,30      | -0,97       | -0,67       | similar to ribosomal protein S13                                                                                                              |
| <b>LOC479261</b> | 479261    | -0,64            | -0,90      | -0,97       | -1,15       | similar to R53.5                                                                                                                              |
| <b>DPM1</b>      | 477264    | -0,69            | -0,86      | -0,97       | -1,02       | dolichyl-phosphate mannosyltransferase polypeptide 1, catalytic subunit                                                                       |
| <b>ATP1A1</b>    | 403992    | -0,87            | -0,70      | -0,97       | -0,95       | ATPase, Na+/K+                                                                                                                                |

| Symbol    | Entrez Id | log2 fold change |            |             |             | Name                                                                                     |
|-----------|-----------|------------------|------------|-------------|-------------|------------------------------------------------------------------------------------------|
|           |           | 4hrs p.i.        | 8 hrs p.i. | 10 hrs p.i. | 12 hrs p.i. |                                                                                          |
| DBT       | 479929    | -0,48            | -0,52      | -0,96       | -0,96       | transporting, alpha 1 polypeptide                                                        |
| LOC479350 | 479350    | -0,38            | -0,50      | -0,96       | -0,85       | dihydrolipoamide branched chain transacylase E2                                          |
| TMED5     | 479947    | -0,66            | -0,47      | -0,96       | -0,71       | similar to ribosomal protein L37                                                         |
| NDUFS3    | 475978    | -0,73            | -0,53      | -0,96       | -0,92       | transmembrane emp24 protein transport domain containing 5                                |
| RPL22     | 479587    | -0,46            | -0,28      | -0,96       | -0,60       | NADH dehydrogenase (ubiquinone) Fe-S protein 3, 30kDa (NADH-coenzyme Q reductase)        |
| NDUFA9    | 477718    | -0,57            | -0,81      | -0,96       | -0,92       | ribosomal protein L22                                                                    |
| ATP5C1    | 478009    | -0,73            | -0,78      | -0,95       | -0,92       | NADH dehydrogenase (ubiquinone) 1 alpha subcomplex, 9, 39kDa                             |
| RAB14     | 474818    | -0,79            | -0,88      | -0,95       | -0,86       | ATP synthase, H+ transporting, mitochondrial F1 complex, gamma polypeptide 1             |
| RPL27     | 403688    | -0,57            | -0,41      | -0,95       | -0,70       | RAB14, member RAS oncogene family                                                        |
| SLC1A5    | 484425    | -1,91            | -1,20      | -0,94       | -1,46       | ribosomal protein L27                                                                    |
| ITGB3     | 403788    | -0,54            | -0,52      | -0,93       | -0,91       | solute carrier family 1 (neutral amino acid transporter), member 5                       |
| RPL12     | 476346    | -0,49            | -0,34      | -0,93       | -0,60       | integrin, beta 3 (platelet glycoprotein IIIa, antigen CD61)                              |
| SLC25A3   | 475436    | -0,71            | -0,64      | -0,93       | -0,84       | ribosomal protein L12                                                                    |
| SLC25A24  | 611922    | -0,74            | -0,79      | -0,93       | -1,00       | solute carrier family 25 (mitochondrial carrier; phosphate carrier), member 3            |
| YTHDF2    | 478161    | -0,33            | -0,08      | -0,93       | -0,72       | solute carrier family 25 (mitochondrial carrier; phosphate carrier), member 24           |
| LOC476372 | 476372    | -0,87            | -0,84      | -0,93       | -0,98       | YTH domain family, member 2                                                              |
| NOL10     | 482966    | -0,93            | -0,79      | -0,92       | -1,11       | similar to ATP synthase, H+ transporting, mitochondrial F0 complex, subunit f, isoform 2 |
| F11R      | 478974    | -1,15            | -1,23      | -0,92       | -1,27       | nucleolar protein 10                                                                     |
| SLC25A1   | 608348    | -0,61            | -0,77      | -0,91       | -0,94       | F11 receptor                                                                             |
| RPL36     | 476738    | -0,37            | -0,23      | -0,90       | -0,62       | solute carrier family 25 (mitochondrial carrier; citrate transporter), member 1          |
| MCU       | 489042    | -0,86            | -0,78      | -0,90       | -1,02       | ribosomal protein L36                                                                    |
| LOC474433 | 474433    | -0,88            | -0,79      | -0,90       | -1,01       | mitochondrial calcium uniporter                                                          |
| LOC476525 | 476525    | -0,42            | -0,25      | -0,90       | -0,59       | similar to ATP synthase, H+ transporting, mitochondrial F0 complex, subunit d isoform a  |
| SEC61G    | 404017    | -0,69            | -0,64      | -0,89       | -0,98       | similar to 60S ribosomal protein L26 (Silica-induced gene 20 protein) (SIG-20)           |
| SLC25A13  | 610138    | -0,93            | -0,73      | -0,89       | -1,03       | Sec61 gamma subunit                                                                      |
| ATP2A2    | 403878    | -0,69            | -0,77      | -0,89       | -0,89       | solute carrier family 25, member 13 (citrin)                                             |
| PON2      | 403855    | -0,67            | 0,06       | -0,88       | -0,63       | ATPase, Ca++ transporting, cardiac muscle, slow twitch 2                                 |
| COX5B     | 474567    | -0,74            | -0,82      | -0,87       | -1,16       | paraoxonase 2                                                                            |
| MRPS35    | 477660    | -0,59            | -0,67      | -0,87       | -0,82       | cytochrome c oxidase polypeptide Vb                                                      |
| TRIM25    | 491103    | -0,57            | -0,76      | -0,87       | -0,95       | mitochondrial ribosomal protein S35                                                      |
|           |           |                  |            |             |             | tripartite motif containing 25                                                           |

| Symbol           | Entrez Id | log2 fold change |            |             |             | Name                                                                                     |
|------------------|-----------|------------------|------------|-------------|-------------|------------------------------------------------------------------------------------------|
|                  |           | 4hrs p.i.        | 8 hrs p.i. | 10 hrs p.i. | 12 hrs p.i. |                                                                                          |
| <b>HSD17B12</b>  | 475939    | -0,72            | -0,72      | -0,86       | -0,94       | hydroxysteroid (17-beta) dehydrogenase 12                                                |
| <b>IGF2BP1</b>   | 491064    | -0,46            | -0,48      | -0,86       | -0,75       | insulin-like growth factor 2 mRNA binding protein 1                                      |
| <b>MRPL49</b>    | 483747    | -0,53            | -0,71      | -0,86       | -1,02       | mitochondrial ribosomal protein L49                                                      |
| <b>RPS23</b>     | 479159    | -0,31            | -0,27      | -0,86       | -0,56       | ribosomal protein S23                                                                    |
| <b>LOC479257</b> | 479257    | -0,28            | -0,36      | -0,86       | -0,60       | similar to ribosomal protein S24 isoform 3                                               |
| <b>SSR4</b>      | 481082    | -0,63            | -0,48      | -0,86       | -0,63       | signal sequence receptor, delta                                                          |
| <b>RPS3A</b>     | 403677    | -0,25            | -0,18      | -0,86       | -0,50       | ribosomal protein S3A                                                                    |
| <b>STOML2</b>    | 474755    | -1,07            | -0,89      | -0,86       | -1,12       | stomatin (EPB72)-like 2                                                                  |
| <b>NDUFS1</b>    | 478880    | -0,79            | -0,72      | -0,85       | -0,83       | NADH dehydrogenase (ubiquinone) Fe-S protein 1, 75kDa (NADH-coenzyme Q reductase)        |
| <b>LOC488264</b> | 488264    | -0,44            | -0,74      | -0,85       | -0,87       | similar to Histone H1.2 (H1d)                                                            |
| <b>ITGAV</b>     | 488437    | -0,72            | -0,77      | -0,85       | -1,00       | integrin, alpha V (vitronectin receptor, alpha polypeptide, antigen CD51)                |
| <b>TSPAN8</b>    | 474448    | -0,53            | -0,74      | -0,84       | -0,76       | tetraspanin 8                                                                            |
| <b>AIFM1</b>     | 481048    | -0,86            | -0,80      | -0,84       | -0,91       | apoptosis-inducing factor, mitochondrion-associated, 1                                   |
| <b>ATL3</b>      | 476044    | -0,75            | -0,54      | -0,84       | -0,84       | atlastin GTPase 3                                                                        |
| <b>LOC474877</b> | 474877    | -0,37            | -0,36      | -0,84       | -0,58       | similar to 40S ribosomal protein S10                                                     |
| <b>CEACAM28</b>  | 484473    | -0,46            | -0,92      | -0,84       | -0,90       | carcinoembryonic antigen-related cell adhesion molecule 28                               |
| <b>CYB5R3</b>    | 474479    | -0,75            | -0,68      | -0,84       | -0,76       | cytochrome b5 reductase 3                                                                |
| <b>LOC475410</b> | 475410    | -0,24            | -0,22      | -0,83       | -0,53       | similar to 60S ribosomal protein L32                                                     |
| <b>ITGB4</b>     | 483318    | -0,55            | -0,87      | -0,83       | -1,37       | integrin, beta 4                                                                         |
| <b>RPS29</b>     | 610596    | -0,24            | -0,31      | -0,83       | -0,52       | ribosomal protein S29                                                                    |
| <b>MPDU1</b>     | 489477    | -0,87            | -0,65      | -0,83       | -1,17       | mannose-P-dolichol utilization defect 1                                                  |
| <b>TMCO1</b>     | 478992    | -1,05            | -1,01      | -0,82       | -1,07       | transmembrane and coiled-coil domains 1                                                  |
| <b>BCAP31</b>    | 481080    | -0,75            | -0,69      | -0,82       | -0,98       | B-cell receptor-associated protein 31                                                    |
| <b>TSPO</b>      | 474475    | -1,09            | -0,74      | -0,82       | -0,99       | translocator protein (18kDa)                                                             |
| <b>FKBP11</b>    | 608951    | -0,73            | -0,56      | -0,81       | -0,66       | FK506 binding protein 11, 19 kDa                                                         |
| <b>NDUFA13</b>   | 476659    | -0,62            | -0,60      | -0,81       | -0,89       | NADH dehydrogenase (ubiquinone) 1 alpha subcomplex, 13                                   |
| <b>ACSL4</b>     | 481018    | -1,08            | -0,94      | -0,81       | -1,18       | acyl-CoA synthetase long-chain family member 4                                           |
| <b>HMGB3</b>     | 481073    | -0,47            | -1,03      | -0,80       | -1,08       | high mobility group box 3                                                                |
| <b>NOMO2</b>     | 489992    | -0,73            | -0,89      | -0,80       | -1,05       | NODAL modulator 2                                                                        |
| <b>PABPC4</b>    | 482464    | -0,55            | -0,50      | -0,80       | -0,70       | poly(A) binding protein, cytoplasmic 4 (inducible form)                                  |
| <b>PHB</b>       | 480547    | -0,74            | -0,68      | -0,80       | -0,90       | prohibitin                                                                               |
| <b>SYNCRIP</b>   | 474986    | -0,48            | -0,40      | -0,80       | -0,72       | synaptotagmin binding, cytoplasmic RNA interacting protein                               |
| <b>RALY</b>      | 485845    | -0,62            | -0,34      | -0,79       | -0,41       | RNA binding protein, autoantigenic (hnRNP-associated with lethal yellow homolog (mouse)) |
| <b>LOC483166</b> | 483166    | -0,48            | -0,56      | -0,78       | -0,72       | similar to germinal histone H4 gene                                                      |
| <b>DDOST</b>     | 404012    | -0,71            | -0,65      | -0,78       | -0,76       | dolichyl-diphosphooligosaccharide--protein glycosyltransferase                           |
| <b>PTGS2</b>     | 442942    | -0,27            | -0,37      | -0,77       | -0,52       | prostaglandin-endoperoxide synthase 2 (prostaglandin G/H synthase and                    |

| Symbol    | Entrez Id | log2 fold change |            |             |             | Name                                                                                                                        |
|-----------|-----------|------------------|------------|-------------|-------------|-----------------------------------------------------------------------------------------------------------------------------|
|           |           | 4hrs p.i.        | 8 hrs p.i. | 10 hrs p.i. | 12 hrs p.i. |                                                                                                                             |
|           |           |                  |            |             |             | cyclooxygenase)                                                                                                             |
| RPL18     | 476422    | -0,31            | -0,18      | -0,77       | -0,49       | ribosomal protein L18                                                                                                       |
| HSD17B4   | 474630    | -0,61            | -0,55      | -0,77       | -0,82       | hydroxysteroid (17-beta) dehydrogenase 4                                                                                    |
| CIRBP     | 476755    | -0,27            | -0,55      | -0,77       | -0,65       | cold inducible RNA binding protein                                                                                          |
| H2AFY     | 481514    | -0,66            | -0,64      | -0,77       | -0,84       | H2A histone family, member Y                                                                                                |
| NCL       | 608445    | -0,40            | -0,14      | -0,77       | -0,49       | nucleolin                                                                                                                   |
| TMED10    | 610559    | -0,77            | -0,64      | -0,76       | -0,76       | transmembrane emp24-like trafficking protein 10 (yeast)                                                                     |
| LOC608089 | 608089    | -1,14            | 0,33       | -0,76       | -1,08       | similar to Adipocyte plasma membrane-associated protein (BSCv protein)                                                      |
| ATP5D     | 476756    | -0,79            | -0,82      | -0,76       | -0,85       | ATP synthase, H+ transporting, mitochondrial F1 complex, delta subunit                                                      |
| LOC491074 | 491074    | -0,73            | -0,88      | -0,76       | -0,67       | similar to integrin alpha 3 isoform b, precursor                                                                            |
| DLAT      | 489406    | -0,68            | -0,68      | -0,76       | -0,69       | dihydrolipoamide S-acetyltransferase                                                                                        |
| RPS3      | 476804    | -0,32            | -0,21      | -0,75       | -0,57       | ribosomal protein S3                                                                                                        |
| ITGA2     | 489208    | -0,28            | -0,70      | -0,75       | -0,73       | integrin, alpha 2 (CD49B, alpha 2 subunit of VLA-2 receptor)                                                                |
| TOMM22    | 610117    | -1,08            | -0,90      | -0,75       | -1,23       | translocase of outer mitochondrial membrane 22 homolog (yeast)                                                              |
| DDX21     | 476891    | -0,61            | -0,38      | -0,74       | -0,70       | DEAD (Asp-Glu-Ala-Asp) box polypeptide 21                                                                                   |
| LOC476842 | 476842    | -0,12            | -0,02      | -0,74       | -0,38       | similar to ribosomal protein L27a                                                                                           |
| TFRC      | 403703    | -0,35            | -0,73      | -0,74       | -1,02       | transferrin receptor (p90, CD71)                                                                                            |
| FIS1      | 479728    | -0,66            | -0,72      | -0,74       | -0,85       | fission 1 (mitochondrial outer membrane) homolog (S. cerevisiae)                                                            |
| HNRNPR    | 478192    | -0,57            | -0,49      | -0,74       | -0,75       | heterogeneous nuclear ribonucleoprotein R                                                                                   |
| LOC483168 | 483168    | -0,61            | -0,77      | -0,74       | -0,82       | similar to Histone H2A.o (H2A/o) (H2A.2) (H2a-615)                                                                          |
| PGRMC1    | 481029    | -0,64            | -0,73      | -0,73       | -0,88       | progesterone receptor membrane component 1                                                                                  |
| RPS17     | 403681    | -0,19            | -0,22      | -0,73       | -0,42       | ribosomal protein S17                                                                                                       |
| RAP1B     | 608981    | -0,65            | -0,67      | -0,73       | -0,68       | RAP1B, member of RAS oncogene family                                                                                        |
| TMEM33    | 612937    | -0,71            | -0,58      | -0,73       | -0,68       | transmembrane protein 33                                                                                                    |
| GTPBP4    | 478021    | -0,57            | -0,23      | -0,73       | -0,66       | GTP binding protein 4                                                                                                       |
| LOC478370 | 478370    | -0,68            | -0,61      | -0,73       | -0,77       | similar to Cytochrome c oxidase polypeptide Va, mitochondrial precursor                                                     |
| SLC25A5   | 492093    | -0,27            | -0,47      | -0,73       | -0,56       | solute carrier family 25 (mitochondrial carrier; adenine nucleotide translocator), member 5                                 |
| SUPT16H   | 612874    | -0,67            | -0,59      | -0,72       | -0,91       | suppressor of Ty 16 homolog (S. cerevisiae)                                                                                 |
| LOC611089 | 611089    | -0,51            | -0,60      | -0,72       | -0,75       | similar to H2B histone family, member F                                                                                     |
| LOC479778 | 479778    | -0,42            | -0,51      | -0,71       | -0,87       | similar to fusion (involved in t(12;16) in malignant liposarcoma) (predicted)                                               |
| ATP1B3    | 477098    | -0,76            | -0,69      | -0,71       | -0,81       | ATPase, Na+/K+ transporting, beta 3 polypeptide                                                                             |
| LOC476824 | 476824    | -0,49            | -0,40      | -0,71       | -0,55       | similar to NADH-ubiquinone oxidoreductase 23 kDa subunit, mitochondrial precursor (Complex I-23KD) (CI-23KD) (TYKY subunit) |
| L1CAM     | 492244    | -0,41            | -0,59      | -0,70       | -0,83       | L1 cell adhesion molecule                                                                                                   |

| Symbol           | Entrez Id | log2 fold change |            |             |             | Name                                                                                                         |
|------------------|-----------|------------------|------------|-------------|-------------|--------------------------------------------------------------------------------------------------------------|
|                  |           | 4hrs p.i.        | 8 hrs p.i. | 10 hrs p.i. | 12 hrs p.i. |                                                                                                              |
| <b>NDUFV2</b>    | 480204    | -0,69            | -0,60      | -0,70       | -0,82       | NADH dehydrogenase (ubiquinone) flavoprotein 2, 24kDa                                                        |
| <b>LOC483167</b> | 483167    | -0,41            | -0,50      | -0,69       | -0,71       | similar to H3 histone, family 2 isoform 2                                                                    |
| <b>EIF2S3</b>    | 480866    | -0,37            | -0,52      | -0,69       | -0,54       | eukaryotic translation initiation factor 2, subunit 3 gamma, 52kDa                                           |
| <b>LRPPRC</b>    | 474572    | -0,58            | -0,69      | -0,69       | -0,77       | leucine-rich PPR-motif containing                                                                            |
| <b>CISD1</b>     | 479212    | -0,86            | -0,85      | -0,68       | -0,66       | CDGSH iron sulfur domain 1                                                                                   |
| <b>PFDN2</b>     | 488648    | -0,47            | -1,04      | -0,68       | -0,54       | prefoldin subunit 2                                                                                          |
| <b>UPF1</b>      | 476664    | -0,30            | -0,49      | -0,68       | -1,00       | UPF1 regulator of nonsense transcripts homolog (yeast)                                                       |
| <b>PABPC1</b>    | 612751    | -0,25            | -0,41      | -0,67       | -0,58       | poly(A) binding protein, cytoplasmic 1                                                                       |
| <b>POR</b>       | 489816    | -1,00            | -0,59      | -0,67       | -0,85       | P450 (cytochrome) oxidoreductase                                                                             |
| <b>NDUFB10</b>   | 479887    | -0,43            | -0,35      | -0,67       | -0,54       | NADH dehydrogenase (ubiquinone) 1 beta subcomplex, 10, 22kDa                                                 |
| <b>CTNND1</b>    | 483489    | -0,36            | -0,53      | -0,66       | -0,72       | catenin (cadherin-associated protein), delta 1                                                               |
| <b>LOC475121</b> | 475121    | -0,73            | -0,55      | -0,66       | -0,69       | similar to cytochrome c-1                                                                                    |
| <b>LOC484627</b> | 484627    | -0,25            | -0,21      | -0,66       | -0,45       | similar to H1 histone family, member X                                                                       |
| <b>REEP5</b>     | 479137    | -0,41            | -0,76      | -0,66       | -0,69       | receptor accessory protein 5                                                                                 |
| <b>RPL35</b>     | 480729    | -0,15            | -0,14      | -0,66       | -0,49       | ribosomal protein L35                                                                                        |
| <b>MYO1D</b>     | 491153    | -0,27            | -0,47      | -0,66       | -0,81       | myosin ID                                                                                                    |
| <b>DHX9</b>      | 480032    | -0,50            | -0,44      | -0,66       | -0,67       | DEAH (Asp-Glu-Ala-His) box polypeptide 9                                                                     |
| <b>ZMPSTE24</b>  | 482460    | -0,76            | -0,86      | -0,66       | -0,70       | zinc metalloproteinase (STE24 homolog, S. cerevisiae)                                                        |
| <b>EPCAM</b>     | 481360    | -0,60            | -0,31      | -0,65       | -0,45       | epithelial cell adhesion molecule                                                                            |
| <b>PICALM</b>    | 476780    | -0,22            | -0,37      | -0,65       | -0,58       | phosphatidylinositol binding clathrin assembly protein                                                       |
| <b>LOC478410</b> | 478410    | -0,49            | -0,51      | -0,65       | -0,69       | similar to ATP synthase O subunit, mitochondrial precursor (Oligomycin sensitivity conferral protein) (OSCP) |
| <b>CNP</b>       | 607694    | -0,49            | -0,76      | -0,65       | -0,82       | 2',3'-cyclic nucleotide 3' phosphodiesterase                                                                 |
| <b>RTN4</b>      | 474598    | -0,78            | -0,63      | -0,65       | -0,90       | reticulon 4                                                                                                  |
| <b>LOC488289</b> | 488289    | -0,53            | -0,51      | -0,63       | -0,69       | similar to Histone H2A.1                                                                                     |
| <b>SYPL1</b>     | 475889    | -0,24            | -0,51      | -0,63       | -0,72       | synaptophysin-like 1                                                                                         |
| <b>PDHX</b>      | 475942    | -0,49            | 0,16       | -0,63       | -0,98       | pyruvate dehydrogenase complex, component X                                                                  |
| <b>STT3B</b>     | 485628    | -0,50            | -0,26      | -0,63       | -0,55       | STT3, subunit of the oligosaccharyltransferase complex, homolog B (S. cerevisiae)                            |
| <b>MRTO4</b>     | 487406    | -0,52            | -0,49      | -0,62       | -0,65       | mRNA turnover 4 homolog (S. cerevisiae)                                                                      |
| <b>YES1</b>      | 490532    | -0,51            | -0,44      | -0,62       | -0,94       | v-yes-1 Yamaguchi sarcoma viral oncogene homolog 1                                                           |
| <b>MRPL12</b>    | 608030    | -0,44            | -0,52      | -0,62       | -0,60       | mitochondrial ribosomal protein L12                                                                          |
| <b>ARL6IP5</b>   | 476559    | -0,62            | -0,73      | -0,62       | -0,77       | ADP-ribosylation-like factor 6 interacting protein 5                                                         |
| <b>SLC2A1</b>    | 482437    | -0,06            | -0,18      | -0,62       | -0,43       | solute carrier family 2 (facilitated glucose transporter), member 1                                          |
| <b>LOC612644</b> | 612644    | -0,57            | -0,79      | -0,62       | -0,90       | similar to cytochrome c oxidase, subunit VIb polypeptide 1                                                   |
| <b>STOM</b>      | 612719    | -0,51            | -0,33      | -0,61       | -0,61       | stomatin                                                                                                     |
| <b>ESYT1</b>     | 474397    | -0,66            | -0,78      | -0,61       | -0,96       | extended synaptotagmin-like protein 1                                                                        |

| Symbol    | Entrez Id | log2 fold change |            |             |             | Name                                                                   |
|-----------|-----------|------------------|------------|-------------|-------------|------------------------------------------------------------------------|
|           |           | 4hrs p.i.        | 8 hrs p.i. | 10 hrs p.i. | 12 hrs p.i. |                                                                        |
| SRPK1     | 474887    | -0,22            | 0,07       | -0,61       | -0,33       | SRSF protein kinase 1                                                  |
| RAB2A     | 404009    | -0,42            | -0,56      | -0,61       | -0,63       | RAB2A, member RAS oncogene family                                      |
| ABCD3     | 479939    | -0,49            | -0,36      | -0,61       | -0,59       | ATP-binding cassette, sub-family D (ALD), member 3                     |
| BMS1      | 477760    | -0,25            | -0,24      | -0,61       | -0,58       | BMS1 homolog, ribosome assembly protein (yeast)                        |
| SRSF9     | 477510    | -0,26            | -0,42      | -0,60       | -0,66       | serine/arginine-rich splicing factor 9                                 |
| VAPA      | 480208    | -0,43            | -0,38      | -0,60       | -0,66       | VAMP (vesicle-associated membrane protein)-associated protein A, 33kDa |
| PARP1     | 490385    | -0,50            | -0,61      | -0,60       | -0,60       | poly (ADP-ribose) polymerase 1                                         |
| ARL8B     | 612944    | -0,44            | -0,40      | -0,59       | -0,04       | ADP-ribosylation factor-like 8B                                        |
| PRPF4B    | 488199    | -0,29            | -0,65      | -0,59       | -0,39       | PRP4 pre-mRNA processing factor 4 homolog B (yeast)                    |
| DDX55     | 486246    | -0,28            | -0,16      | -0,59       | -0,29       | DEAD (Asp-Glu-Ala-Asp) box polypeptide 55                              |
| LOC475524 | 475524    | -0,73            | -0,60      | -0,59       | -0,58       | similar to single-stranded DNA binding protein 1 isoform 1             |
| CSNK2A1   | 477185    | -0,68            | -0,88      | -0,59       | -0,68       | casein kinase 2, alpha 1 polypeptide                                   |
| PCYOX1    | 481418    | -0,61            | -0,64      | -0,59       | -0,65       | prenylcysteine oxidase 1                                               |
| ITPR3     | 481746    | -0,43            | -0,81      | -0,58       | -0,90       | inositol 1,4,5-trisphosphate receptor, type 3                          |
| RPS27A    | 474599    | 0,05             | -0,27      | -0,58       | -0,49       | ribosomal protein S27a                                                 |
| LAMP2     | 481037    | -0,28            | -0,77      | -0,58       | -0,40       | lysosomal-associated membrane protein 2                                |
| NPM3      | 477801    | 0,46             | 0,29       | -0,57       | -0,78       | nucleophosmin/nucleoplasmic protein 3                                  |
| LOC478509 | 478509    | 0,00             | -0,12      | -0,57       | -0,33       | similar to ribosomal protein L34                                       |
| INTS2     | 610121    | 0,24             | 0,29       | -0,57       | 0,14        | integrator complex subunit 2                                           |
| LOC475501 | 475501    | -0,42            | -0,52      | -0,57       | -0,41       | similar to H2A histone family, member V isoform 5                      |
| PTBP1     | 485097    | -0,24            | -0,24      | -0,56       | -0,36       | polypyrimidine tract binding protein 1                                 |
| RAB1B     | 610762    | -0,29            | -0,27      | -0,56       | -0,34       | RAB1B, member RAS oncogene family                                      |
| RALA      | 475875    | -0,25            | -0,45      | -0,56       | -0,46       | v-ral simian leukemia viral oncogene homolog A (ras related)           |
| RPS18     | 403685    | -0,01            | 0,04       | -0,56       | -0,30       | ribosomal protein S18                                                  |
| MYBBP1A   | 489442    | -0,52            | -0,23      | -0,56       | -0,49       | MYB binding protein (P160) 1a                                          |
| MRPS26    | 477175    | -1,02            | -0,92      | -0,56       | -0,98       | mitochondrial ribosomal protein S26                                    |
| GNB1      | 403912    | -0,41            | -0,28      | -0,55       | -0,44       | guanine nucleotide binding protein (G protein), beta polypeptide 1     |
| RPL37A    | 478904    | 0,25             | 0,14       | -0,55       | -0,12       | ribosomal protein L37a                                                 |
| RAB10     | 403958    | -0,39            | -0,32      | -0,55       | -0,42       | RAB10, member RAS oncogene family                                      |
| RAB7A     | 404007    | -0,35            | -0,51      | -0,54       | -0,59       | RAB7A, member RAS oncogene family                                      |
| WDR75     | 488443    | -0,33            | -0,30      | -0,54       | -0,66       | WD repeat domain 75                                                    |
| HEATR1    | 479192    | -0,46            | -0,32      | -0,54       | -0,48       | HEAT repeat containing 1                                               |
| CLU       | 442971    | -0,23            | -0,21      | -0,54       | -0,52       | clusterin                                                              |
| RSL1D1    | 479847    | -0,45            | -0,20      | -0,53       | -0,59       | ribosomal L1 domain containing 1                                       |
| CHCHD3    | 607574    | -0,16            | 0,03       | -0,53       | -0,21       | coiled-coil-helix-coiled-coil-helix domain containing 3                |
| RBM4      | 610648    | -0,33            | -0,07      | -0,53       | -0,56       | RNA binding motif protein 4                                            |
| LOC490458 | 490458    | -0,37            | -0,64      | -0,53       | -0,81       | similar to S100 calcium binding protein A16                            |
| LOC483175 | 483175    | -0,31            | -0,55      | -0,53       | -0,61       | similar to histone H2A                                                 |
| NDUFV1    | 476004    | -0,60            | -0,58      | -0,53       | -0,62       | NADH dehydrogenase (ubiquinone) flavoprotein 1,                        |



| Symbol    | Entrez Id | log2 fold change |            |             |             | Name                                                                                      |
|-----------|-----------|------------------|------------|-------------|-------------|-------------------------------------------------------------------------------------------|
|           |           | 4hrs p.i.        | 8 hrs p.i. | 10 hrs p.i. | 12 hrs p.i. |                                                                                           |
|           |           |                  |            |             |             | 51kDa                                                                                     |
| HMGB2     | 486068    | -0,04            | -0,52      | -0,52       | -0,70       | high mobility group box 2                                                                 |
| UQCRC2    | 479815    | -0,47            | -0,49      | -0,52       | -0,68       | ubiquinol-cytochrome c reductase core protein II                                          |
| ENTPD3    | 485604    | -0,31            | -0,74      | -0,52       | -0,76       | ectonucleoside triphosphate diphosphohydrolase 3                                          |
| FKBP10    | 490975    | -0,59            | -1,11      | -0,52       | -0,96       | FK506 binding protein 10, 65 kDa                                                          |
| CSDE1     | 475807    | -0,11            | -0,24      | -0,52       | -0,42       | cold shock domain containing E1, RNA-binding                                              |
| MYO1C     | 480646    | -0,53            | -0,51      | -0,52       | -0,63       | myosin IC                                                                                 |
| WDR43     | 475713    | -0,42            | -0,95      | -0,52       | -0,75       | WD repeat domain 43                                                                       |
| SEC61B    | 404018    | -0,32            | -0,61      | -0,52       | -0,21       | Sec61 beta subunit                                                                        |
| ATP5B     | 403669    | -0,58            | -0,59      | -0,52       | -0,57       | ATP synthase, H <sup>+</sup> transporting, mitochondrial F1 complex, beta polypeptide     |
| LOC481774 | 481774    | -0,12            | -0,25      | -0,52       | -0,49       | similar to U1 small nuclear ribonucleoprotein C (U1 snRNP protein C) (U1C protein) (U1-C) |
| COPA      | 478973    | -0,19            | -0,36      | -0,51       | -0,52       | coatamer protein complex, subunit alpha                                                   |
| ATAD3B    | 479568    | -0,46            | -0,35      | -0,51       | -0,43       | ATPase family, AAA domain containing 3B                                                   |
| RAB1A     | 403774    | -0,43            | -0,36      | -0,51       | -0,48       | RAB1A, member RAS oncogene family                                                         |
| ILF3      | 484950    | -0,28            | -0,30      | -0,51       | -0,52       | interleukin enhancer binding factor 3, 90kDa                                              |
| EPHA2     | 487421    | -0,28            | -0,74      | -0,51       | -0,36       | EPH receptor A2                                                                           |
| RRS1      | 486978    | -0,60            | -0,39      | -0,50       | -0,62       | RRS1 ribosome biogenesis regulator homolog (S. cerevisiae)                                |
| BCKDHB    | 474978    | -0,40            | -0,54      | -0,50       | -0,71       | branched chain keto acid dehydrogenase E1, beta polypeptide                               |
| TRA2B     | 478663    | -0,29            | -0,37      | -0,50       | -0,56       | transformer 2 beta homolog (Drosophila)                                                   |
| RAB6A     | 608330    | -0,35            | -0,34      | -0,50       | -0,46       | RAB6A, member RAS oncogene family                                                         |
| AFG3L2    | 490560    | -0,40            | 0,37       | -0,50       | -0,37       | AFG3 ATPase family gene 3-like 2 (S. cerevisiae)                                          |
| SDHB      | 478217    | -0,47            | -0,55      | -0,50       | -0,67       | succinate dehydrogenase complex, subunit B, iron sulfur (lp)                              |
| CELF1     | 475979    | -0,13            | -0,52      | -0,49       | -0,80       | CUGBP, Elav-like family member 1                                                          |
| LOC478348 | 478348    | -0,06            | -0,02      | -0,49       | -0,20       | similar to ribosomal protein L4                                                           |
| ERP29     | 477482    | -0,45            | -0,83      | -0,48       | -0,79       | endoplasmic reticulum protein 29                                                          |
| LOC474698 | 474698    | -0,21            | -0,27      | -0,47       | -0,43       | similar to catenin (cadherin-associated protein), alpha 1, 102kDa                         |
| SUCLA2    | 485448    | -0,35            | -0,43      | -0,47       | -0,50       | succinate-CoA ligase, ADP-forming, beta subunit                                           |
| NDUFS2    | 478981    | -0,26            | -0,14      | -0,47       | -0,60       | NADH dehydrogenase (ubiquinone) Fe-S protein 2, 49kDa (NADH-coenzyme Q reductase)         |
| RPS19     | 476450    | 0,11             | -0,03      | -0,47       | -0,22       | ribosomal protein S19                                                                     |
| GNA11     | 403914    | -0,36            | -0,23      | -0,47       | -0,19       | guanine nucleotide binding protein (G protein), alpha 11 (Gq class)                       |
| CTNNB1    | 477032    | -0,28            | -0,43      | -0,47       | -0,56       | catenin (cadherin-associated protein), beta 1, 88kDa                                      |
| HNRNPH1   | 481455    | -0,32            | -0,32      | -0,46       | -0,55       | heterogeneous nuclear ribonucleoprotein H1 (H)                                            |
| RPS16     | 476463    | 0,11             | 0,07       | -0,46       | -0,18       | ribosomal protein S16                                                                     |
| UBXN4     | 476130    | -0,39            | -0,52      | -0,45       | -0,61       | UBX domain protein 4                                                                      |
| LOC491080 | 491080    | -0,42            | -0,41      | -0,45       | -0,47       | similar to CG3408-PA                                                                      |

| Symbol    | Entrez Id | log2 fold change |            |             |             | Name                                                                                                             |
|-----------|-----------|------------------|------------|-------------|-------------|------------------------------------------------------------------------------------------------------------------|
|           |           | 4hrs p.i.        | 8 hrs p.i. | 10 hrs p.i. | 12 hrs p.i. |                                                                                                                  |
| SRPR      | 489293    | -0,26            | -0,78      | -0,45       | -0,58       | signal recognition particle receptor (docking protein)                                                           |
| RBM28     | 475203    | -0,33            | 0,06       | -0,45       | -0,51       | RNA binding motif protein 28                                                                                     |
| CAT       | 403474    | -0,51            | -0,70      | -0,45       | -0,68       | catalase                                                                                                         |
| ZONAB     | 403728    | -0,46            | -0,55      | -0,45       | -0,71       | Y-box protein ZONAB-A                                                                                            |
| HNRNPD    | 478450    | -0,06            | -0,23      | -0,45       | -0,32       | heterogeneous nuclear ribonucleoprotein D (AU-rich element RNA binding protein 1, 37kDa)                         |
| RTN3      | 476043    | -0,42            | -0,47      | -0,44       | -0,43       | reticulon 3                                                                                                      |
| UQCRC1    | 608455    | -0,09            | -0,36      | -0,44       | -0,38       | ubiquinol-cytochrome c reductase core protein I                                                                  |
| RAB8A     | 403773    | -0,37            | -0,59      | -0,44       | -0,52       | RAB8A, member RAS oncogene family                                                                                |
| PPIB      | 478337    | -0,25            | -0,37      | -0,44       | -0,35       | peptidylprolyl isomerase B (cyclophilin B)                                                                       |
| DRAP1     | 476018    | -0,05            | -0,48      | -0,43       | -0,34       | DR1-associated protein 1 (negative cofactor 2 alpha)                                                             |
| POGLUT1   | 487993    | -0,17            | -0,57      | -0,43       | -0,71       | protein O-glucosyltransferase 1                                                                                  |
| LOC480971 | 480971    | -0,44            | -0,85      | -0,43       | -0,29       | similar to Ewing sarcoma breakpoint region 1 isoform EWS                                                         |
| RPL10     | 481085    | 0,09             | 0,09       | -0,42       | -0,05       | ribosomal protein L10                                                                                            |
| HK1       | 479234    | -0,36            | -0,19      | -0,42       | -0,17       | hexokinase 1                                                                                                     |
| PRRC1     | 481489    | -0,34            | -0,78      | -0,41       | -0,86       | proline-rich coiled-coil 1                                                                                       |
| DDX18     | 476120    | -0,20            | -0,10      | -0,41       | -0,38       | DEAD (Asp-Glu-Ala-Asp) box polypeptide 18                                                                        |
| NOP10     | 607299    | -0,37            | -0,32      | -0,41       | -0,58       | NOP10 ribonucleoprotein homolog (yeast)                                                                          |
| ACSS1     | 477002    | -0,34            | -0,53      | -0,41       | -0,22       | acyl-CoA synthetase short-chain family member 1                                                                  |
| EIF6      | 477210    | -0,40            | -0,42      | -0,41       | -0,49       | eukaryotic translation initiation factor 6                                                                       |
| NMT1      | 480494    | -0,03            | -0,14      | -0,41       | -0,29       | N-myristoyltransferase 1                                                                                         |
| PRDX4     | 491776    | -0,15            | -0,48      | -0,41       | -0,45       | peroxiredoxin 4                                                                                                  |
| IGF2BP2   | 478662    | 0,01             | -0,18      | -0,41       | -0,64       | insulin-like growth factor 2 mRNA binding protein 2                                                              |
| NLE1      | 491142    | -0,31            | -0,61      | -0,40       | -0,37       | notchless homolog 1 (Drosophila)                                                                                 |
| HNRNPA3   | 608074    | -0,26            | -0,23      | -0,40       | -0,34       | heterogeneous nuclear ribonucleoprotein A3                                                                       |
| BAX       | 403523    | -0,24            | -0,68      | -0,40       | 0,02        | BCL2-associated X protein                                                                                        |
| RPL17     | 475077    | 0,14             | 0,10       | -0,40       | -0,11       | ribosomal protein L17                                                                                            |
| UGGT1     | 476101    | -0,37            | -0,61      | -0,39       | -0,57       | UDP-glucose glycoprotein glucosyltransferase 1                                                                   |
| TM9SF3    | 612786    | -0,50            | -0,31      | -0,39       | -0,38       | transmembrane 9 superfamily member 3                                                                             |
| FAU       | 483748    | 0,06             | -0,22      | -0,39       | -0,17       | Finkel-Biskis-Reilly murine sarcoma virus (FBR-MuSV) ubiquitously expressed                                      |
| EIF2S1    | 480361    | 0,04             | -0,09      | -0,39       | -0,18       | eukaryotic translation initiation factor 2, subunit 1 alpha, 35kDa                                               |
| COPB2     | 477088    | -0,20            | -0,42      | -0,38       | -0,40       | coatamer protein complex, subunit beta 2 (beta prime)                                                            |
| HADHA     | 475687    | -0,38            | -0,48      | -0,38       | -0,47       | hydroxyacyl-CoA dehydrogenase/3-ketoacyl-CoA thiolase/enoyl-CoA hydratase (trifunctional protein), alpha subunit |
| LOC608656 | 608656    | -0,47            | -0,48      | -0,37       | -0,58       | similar to oxoglutarate (alpha-ketoglutarate) dehydrogenase (lipoamide) isoform 1 precursor                      |
| MTX1      | 480130    | -0,19            | -0,44      | -0,37       | -0,31       | metaxin 1                                                                                                        |
| NDUFAB1   | 479805    | -0,21            | -0,48      | -0,37       | -0,51       | NADH dehydrogenase (ubiquinone) 1, alpha/beta subcomplex, 1, 8kDa                                                |
| ACAD9     | 476519    | -0,15            | -0,36      | -0,36       | -0,38       | acyl-CoA dehydrogenase                                                                                           |

| Symbol    | Entrez Id | log2 fold change |            |             |             | Name                                                                                                                                                                      |
|-----------|-----------|------------------|------------|-------------|-------------|---------------------------------------------------------------------------------------------------------------------------------------------------------------------------|
|           |           | 4hrs p.i.        | 8 hrs p.i. | 10 hrs p.i. | 12 hrs p.i. |                                                                                                                                                                           |
|           |           |                  |            |             |             | family, member 9                                                                                                                                                          |
| DAO       | 486317    | -0,19            | -0,41      | -0,36       | -0,33       | D-amino-acid oxidase                                                                                                                                                      |
| ACADVL    | 489463    | -0,37            | -0,50      | -0,36       | -0,47       | acyl-CoA dehydrogenase, very long chain                                                                                                                                   |
| SRSF1     | 609693    | -0,27            | -0,36      | -0,36       | -0,53       | serine/arginine-rich splicing factor 1                                                                                                                                    |
| MANF      | 608421    | 0,00             | -0,40      | -0,36       | -0,34       | mesencephalic astrocyte-derived neurotrophic factor                                                                                                                       |
| LOC477839 | 477839    | -0,29            | -0,63      | -0,36       | -0,47       | similar to Thioredoxin-dependent peroxide reductase, mitochondrial precursor (Peroxioredoxin 3) (Antioxidant protein 1) (AOP-1) (MER5 protein homolog) (HBC189) (PRX III) |
| EIF4A3    | 475922    | -0,12            | -0,21      | -0,36       | -0,29       | eukaryotic translation initiation factor 4A3                                                                                                                              |
| LOC479283 | 479283    | 0,01             | -0,19      | -0,36       | -0,32       | similar to Activated RNA polymerase II transcriptional coactivator p15 (Positive cofactor 4) (PC4) (p14)                                                                  |
| NCAPD2    | 477715    | -0,06            | -0,49      | -0,35       | -0,45       | non-SMC condensin I complex, subunit D2                                                                                                                                   |
| RPS28     | 485010    | 0,17             | 0,08       | -0,35       | -0,12       | ribosomal protein S28                                                                                                                                                     |
| HIBADH    | 479610    | -0,28            | -0,65      | -0,35       | -0,31       | 3-hydroxyisobutyrate dehydrogenase                                                                                                                                        |
| RBM47     | 403423    | -0,50            | -0,34      | -0,35       | -0,58       | RNA binding motif protein 47                                                                                                                                              |
| RPL24     | 478547    | 0,14             | 0,10       | -0,35       | -0,14       | ribosomal protein L24                                                                                                                                                     |
| P4HB      | 483369    | -0,19            | -0,61      | -0,34       | -0,42       | prolyl 4-hydroxylase, beta polypeptide                                                                                                                                    |
| LOC477695 | 477695    | -0,18            | -0,40      | -0,34       | -0,34       | similar to mago-nashi homolog                                                                                                                                             |
| F3        | 490153    | -0,18            | -0,32      | -0,34       | -0,50       | coagulation factor III (thromboplastin, tissue factor)                                                                                                                    |
| SERPINH1  | 485187    | -0,24            | -0,37      | -0,34       | -0,43       | serpin peptidase inhibitor, clade H (heat shock protein 47), member 1, (collagen binding protein 1)                                                                       |
| HMGB1     | 403170    | 0,13             | -0,48      | -0,33       | -0,52       | high mobility group box 1                                                                                                                                                 |
| LMNB2     | 485070    | -0,01            | -0,26      | -0,33       | -0,69       | lamin B2                                                                                                                                                                  |
| ATP5A1    | 480149    | -0,27            | -0,38      | -0,33       | -0,34       | ATP synthase, H <sup>+</sup> transporting, mitochondrial F1 complex, alpha subunit 1, cardiac muscle                                                                      |
| DNAJB11   | 478664    | -0,19            | -0,10      | -0,33       | -0,25       | DnaJ (Hsp40) homolog, subfamily B, member 11                                                                                                                              |
| SF3B1     | 488456    | -0,29            | -0,45      | -0,31       | -0,43       | splicing factor 3b, subunit 1, 155kDa                                                                                                                                     |
| SHMT2     | 607458    | -0,23            | -0,33      | -0,31       | -0,42       | serine hydroxymethyltransferase 2 (mitochondrial)                                                                                                                         |
| MAK16     | 475593    | -0,37            | -0,21      | -0,31       | -0,14       | MAK16 homolog (S. cerevisiae)                                                                                                                                             |
| GANAB     | 483784    | -0,19            | -0,58      | -0,31       | -0,48       | glucosidase, alpha; neutral AB                                                                                                                                            |
| ACOT9     | 480864    | 0,05             | -0,28      | -0,31       | -0,17       | acyl-CoA thioesterase 9                                                                                                                                                   |
| PNN       | 403907    | -0,01            | -0,41      | -0,31       | -0,37       | pinin, desmosome associated protein                                                                                                                                       |
| AP1M2     | 611211    | 0,01             | -0,37      | -0,31       | -0,36       | adaptor-related protein complex 1, mu 2 subunit                                                                                                                           |
| SRSF2     | 612817    | -0,21            | -0,19      | -0,29       | -0,38       | serine/arginine-rich splicing factor 2                                                                                                                                    |
| HYOU1     | 479410    | -0,24            | -0,44      | -0,29       | -0,32       | hypoxia up-regulated 1                                                                                                                                                    |
| NOP16     | 479282    | 0,11             | 0,14       | -0,29       | 0,44        | NOP16 nucleolar protein homolog (yeast)                                                                                                                                   |
| MYO6      | 481884    | -0,01            | -0,40      | -0,29       | -0,36       | myosin VI                                                                                                                                                                 |
| HNRPDL    | 476976    | 0,03             | -0,17      | -0,28       | -0,12       | heterogeneous nuclear ribonucleoprotein D-like                                                                                                                            |
| LOC480466 | 480466    | -0,02            | -0,17      | -0,28       | -0,21       | similar to ELAV-like protein 1 (Hu-antigen R) (HuR)                                                                                                                       |

| Symbol    | Entrez Id | log2 fold change |            |             |             | Name                                                                            |
|-----------|-----------|------------------|------------|-------------|-------------|---------------------------------------------------------------------------------|
|           |           | 4hrs p.i.        | 8 hrs p.i. | 10 hrs p.i. | 12 hrs p.i. |                                                                                 |
| HSPA9     | 474697    | -0,24            | -0,34      | -0,28       | -0,30       | heat shock 70kDa protein 9 (mortalin)                                           |
| LOC476328 | 476328    | 0,20             | 0,00       | -0,28       | -0,22       | similar to 60S ribosomal protein L29 (Cell surface heparin binding protein HIP) |
| BLMH      | 480635    | -0,21            | -1,33      | -0,27       | -0,96       | bleomycin hydrolase                                                             |
| BANF1     | 611961    | -0,31            | -0,45      | -0,27       | -0,65       | barrier to autointegration factor 1                                             |
| RPL13     | 479612    | 0,20             | 0,08       | -0,27       | 0,03        | ribosomal protein L13                                                           |
| SOD2      | 476258    | -0,09            | -0,50      | -0,26       | -0,30       | superoxide dismutase 2, mitochondrial                                           |
| IARS2     | 478963    | -0,42            | -0,75      | -0,26       | -0,52       | isoleucyl-tRNA synthetase 2, mitochondrial                                      |
| HSPA5     | 480726    | -0,21            | -0,55      | -0,26       | -0,28       | heat shock 70kDa protein 5 (glucose-regulated protein, 78kDa)                   |
| SRSF3     | 403687    | -0,29            | -0,35      | -0,26       | -0,50       | serine/arginine-rich splicing factor 3                                          |
| SUCLG2    | 476562    | -0,02            | -0,37      | -0,25       | -0,25       | succinate-CoA ligase, GDP-forming, beta subunit                                 |
| AIMP2     | 479752    | -0,03            | -0,41      | -0,25       | -0,08       | aminoacyl tRNA synthetase complex-interacting multifunctional protein 2         |
| LOC490572 | 490572    | 0,10             | -0,09      | -0,25       | -0,15       | similar to myosin, light polypeptide 6, alkali, smooth muscle and non-muscle    |
| HNRNPL    | 476466    | -0,09            | -0,04      | -0,25       | -0,19       | heterogeneous nuclear ribonucleoprotein L                                       |
| EIF2S2    | 477197    | 0,09             | -0,17      | -0,25       | -0,02       | eukaryotic translation initiation factor 2, subunit 2 beta, 38kDa               |
| LOC490810 | 490810    | -0,27            | -0,57      | -0,25       | -0,60       | similar to CG33071-PC, isoform C                                                |
| UTRN      | 442965    | -0,25            | -0,72      | -0,25       | -0,52       | utrophin                                                                        |
| PYCR2     | 480112    | -0,13            | -0,70      | -0,25       | -0,44       | pyrroline-5-carboxylate reductase family, member 2                              |
| ILF2      | 480139    | -0,03            | -0,05      | -0,24       | -0,25       | interleukin enhancer binding factor 2, 45kDa                                    |
| P4HA2     | 474672    | 0,00             | -0,20      | -0,23       | -0,23       | prolyl 4-hydroxylase, alpha polypeptide II                                      |
| RPL28     | 476378    | 0,32             | 0,22       | -0,23       | 0,05        | ribosomal protein L28                                                           |
| SDHA      | 478634    | -0,18            | -0,44      | -0,23       | -0,37       | succinate dehydrogenase complex, subunit A, flavoprotein (Fp)                   |
| NOP56     | 612871    | -0,16            | -0,11      | -0,22       | -0,27       | NOP56 ribonucleoprotein homolog (yeast)                                         |
| PNPT1     | 481376    | -0,21            | -0,52      | -0,22       | -0,89       | polyribonucleotide nucleotidyltransferase 1                                     |
| NUP155    | 479360    | -0,12            | -0,10      | -0,22       | -0,31       | nucleoporin 155kDa                                                              |
| PITRM1    | 478018    | -0,15            | -0,10      | -0,22       | -0,29       | pitrilysin metalloproteinase 1                                                  |
| HSP90B1   | 404019    | -0,10            | -0,52      | -0,21       | -0,31       | heat shock protein 90kDa beta (Grp94), member 1                                 |
| OXCT1     | 479347    | 0,17             | -0,15      | -0,21       | -0,17       | 3-oxoacid CoA transferase 1                                                     |
| HADH      | 478506    | -0,20            | -0,56      | -0,21       | -0,35       | hydroxyacyl-CoA dehydrogenase                                                   |
| TAS1R2    | 478213    | 0,07             | -0,11      | -0,21       | 0,05        | taste receptor, type 1, member 2                                                |
| ETFA      | 610134    | -0,17            | -0,24      | -0,21       | -0,15       | electron-transfer-flavoprotein, alpha polypeptide                               |
| ESRP2     | 489745    | 0,19             | 0,01       | -0,20       | -0,24       | epithelial splicing regulatory protein 2                                        |
| LOC488888 | 488888    | 0,25             | -0,38      | -0,20       | -0,06       | hypothetical LOC488888                                                          |
| DLST      | 480388    | -0,08            | -0,17      | -0,20       | -0,25       | dihydrolipoamide S-succinyltransferase (E2 component of 2-oxoglutarate complex) |
| ERO1L     | 490691    | -0,11            | -0,51      | -0,20       | -0,33       | ERO1-like (S. cerevisiae)                                                       |
| LOC478864 | 478864    | 0,21             | 0,12       | -0,20       | 0,01        | similar to 60S ribosomal protein L21                                            |
| RPL19     | 403682    | 0,31             | 0,23       | -0,20       | 0,09        | ribosomal protein L19                                                           |

| Symbol    | Entrez Id | log2 fold change |            |             |             | Name                                                                                                                                              |
|-----------|-----------|------------------|------------|-------------|-------------|---------------------------------------------------------------------------------------------------------------------------------------------------|
|           |           | 4hrs p.i.        | 8 hrs p.i. | 10 hrs p.i. | 12 hrs p.i. |                                                                                                                                                   |
| STAT3     | 490967    | 0,37             | -0,18      | -0,19       | -0,45       | signal transducer and activator of transcription 3 (acute-phase response factor)                                                                  |
| CALR      | 476694    | -0,09            | -0,58      | -0,19       | -0,29       | calreticulin                                                                                                                                      |
| CNPY2     | 607115    | -0,21            | -0,58      | -0,19       | -0,26       | canopy 2 homolog (zebrafish)                                                                                                                      |
| RAB11B    | 611619    | -0,06            | -0,15      | -0,19       | -0,20       | RAB11B, member RAS oncogene family                                                                                                                |
| ASNA1     | 476699    | -0,24            | -0,86      | -0,19       | -0,57       | arsA arsenite transporter, ATP-binding, homolog 1 (bacterial)                                                                                     |
| PDIA3     | 478279    | -0,06            | -0,36      | -0,19       | -0,12       | protein disulfide isomerase family A, member 3                                                                                                    |
| PRKCSH    | 484941    | -0,23            | -0,53      | -0,19       | -0,52       | protein kinase C substrate 80K-H                                                                                                                  |
| ACAA1     | 477023    | -0,25            | -0,72      | -0,19       | -0,29       | acetyl-CoA acyltransferase 1                                                                                                                      |
| SNRPF     | 482609    | 0,01             | -0,33      | -0,18       | -0,38       | small nuclear ribonucleoprotein polypeptide F                                                                                                     |
| SCP2      | 479564    | 0,02             | -0,40      | -0,18       | -0,45       | sterol carrier protein 2                                                                                                                          |
| IDH2      | 479043    | 0,08             | -0,22      | -0,18       | -0,01       | isocitrate dehydrogenase 2 (NADP+), mitochondrial                                                                                                 |
| MTHFD1L   | 476245    | -0,16            | -0,47      | -0,18       | -0,36       | methylenetetrahydrofolate dehydrogenase (NADP+ dependent) 1-like                                                                                  |
| CAPRIN1   | 607420    | 0,17             | 0,11       | -0,18       | -0,05       | cell cycle associated protein 1                                                                                                                   |
| TBL3      | 490064    | 0,03             | 0,04       | -0,17       | -0,10       | transducin (beta)-like 3                                                                                                                          |
| CDC42     | 403934    | -0,40            | -0,64      | -0,17       | -0,85       | cell division cycle 42 (GTP binding protein, 25kDa)                                                                                               |
| TUBA1C    | 608138    | 0,23             | 0,07       | -0,17       | -0,24       | tubulin, alpha 1c                                                                                                                                 |
| PCK2      | 480255    | 0,02             | -0,18      | -0,16       | -0,28       | phosphoenolpyruvate carboxykinase 2 (mitochondrial)                                                                                               |
| PDHB      | 476574    | -0,25            | -0,41      | -0,16       | -0,32       | pyruvate dehydrogenase (lipoamide) beta                                                                                                           |
| BCAS2     | 475805    | 0,11             | 0,15       | -0,16       | -0,07       | breast carcinoma amplified sequence 2                                                                                                             |
| LOC474524 | 474524    | 0,09             | 0,02       | -0,16       | -0,11       | similar to CG9987-PA                                                                                                                              |
| ME2       | 476198    | -0,17            | -0,57      | -0,15       | -0,44       | malic enzyme 2, NAD(+)-dependent, mitochondrial                                                                                                   |
| HNRNPA0   | 481524    | 0,11             | -0,16      | -0,15       | -0,04       | heterogeneous nuclear ribonucleoprotein A0                                                                                                        |
| LOC475044 | 475044    | 0,03             | -0,07      | -0,15       | -0,01       | similar to Heterogeneous nuclear ribonucleoprotein A1 (Helix-destabilizing protein) (Single-strand binding protein) (hnRNP core protein A1) (HDP) |
| STXBP2    | 403880    | -0,35            | -0,61      | -0,14       | -0,65       | syntaxin binding protein 2                                                                                                                        |
| ALDH18A1  | 477781    | -0,10            | -0,29      | -0,14       | -0,28       | aldehyde dehydrogenase 18 family, member A1                                                                                                       |
| PA2G4     | 474396    | 0,25             | 0,08       | -0,14       | 0,05        | proliferation-associated 2G4, 38kDa                                                                                                               |
| PTPN11    | 477488    | -0,03            | -1,09      | -0,14       | -0,24       | protein tyrosine phosphatase, non-receptor type 11                                                                                                |
| PRPF8     | 480651    | -0,15            | -0,21      | -0,14       | -0,34       | PRP8 pre-mRNA processing factor 8 homolog (S. cerevisiae)                                                                                         |
| TUBB6     | 480213    | 0,25             | 0,07       | -0,13       | -0,08       | tubulin, beta 6                                                                                                                                   |
| GNB2      | 479733    | 0,41             | 0,33       | -0,13       | 0,24        | guanine nucleotide binding protein (G protein), beta polypeptide 2                                                                                |
| TIMM44    | 485005    | -0,18            | -0,51      | -0,13       | -0,50       | translocase of inner mitochondrial membrane 44 homolog (yeast)                                                                                    |
| LOC607081 | 607081    | -0,03            | 0,00       | -0,12       | -0,16       | similar to non-POU domain containing, octamer-binding                                                                                             |
| ATP6V0D1  | 479685    | -0,33            | -0,35      | -0,12       | -0,05       | ATPase, H+ transporting, lysosomal 38kDa, V0 subunit                                                                                              |

| Symbol           | Entrez Id | log2 fold change |            |             |             | Name                                                                   |
|------------------|-----------|------------------|------------|-------------|-------------|------------------------------------------------------------------------|
|                  |           | 4hrs p.i.        | 8 hrs p.i. | 10 hrs p.i. | 12 hrs p.i. |                                                                        |
|                  |           |                  |            |             |             | d1                                                                     |
| <b>LOC478855</b> | 478855    | -0,03            | -0,29      | -0,12       | -0,19       | similar to heat shock 10kDa protein 1 (chaperonin 10)                  |
| <b>M6PR</b>      | 477700    | -0,10            | -0,16      | -0,12       | -0,11       | mannose-6-phosphate receptor (cation dependent)                        |
| <b>ZNF326</b>    | 612406    | -0,15            | -0,10      | -0,12       | -0,13       | zinc finger protein 326                                                |
| <b>ANXA13</b>    | 403935    | -0,08            | -0,12      | -0,11       | -0,04       | annexin A13                                                            |
| <b>AP1G1</b>     | 479666    | 0,20             | -0,07      | -0,11       | -0,14       | adaptor-related protein complex 1, gamma 1 subunit                     |
| <b>HSPD1</b>     | 478854    | -0,11            | -0,29      | -0,11       | -0,14       | heat shock 60kDa protein 1 (chaperonin)                                |
| <b>EIF1</b>      | 403674    | 0,17             | -0,24      | -0,11       | -0,14       | eukaryotic translation initiation factor 1                             |
| <b>PSPC1</b>     | 477347    | -0,07            | -0,09      | -0,11       | -0,27       | paraspeckle component 1                                                |
| <b>RNPS1</b>     | 479880    | -0,13            | -0,32      | -0,11       | -0,23       | RNA binding protein S1, serine-rich domain                             |
| <b>HNRNPCL1</b>  | 474964    | 0,14             | -0,05      | -0,10       | 0,00        | heterogeneous nuclear ribonucleoprotein C-like 1                       |
| <b>TUBB</b>      | 474830    | 0,19             | 0,03       | -0,10       | -0,24       | tubulin, beta                                                          |
| <b>PRKCDBP</b>   | 476831    | 0,35             | -0,24      | -0,10       | -0,10       | protein kinase C, delta binding protein                                |
| <b>NOP58</b>     | 607667    | 0,01             | 0,02       | -0,10       | -0,11       | NOP58 ribonucleoprotein homolog (yeast)                                |
| <b>TIAL1</b>     | 477841    | -0,04            | -0,12      | -0,10       | -0,32       | TIA1 cytotoxic granule-associated RNA binding protein-like 1           |
| <b>RDX</b>       | 479446    | 0,03             | -0,30      | -0,10       | -0,06       | radixin                                                                |
| <b>RPL23</b>     | 403683    | 0,26             | 0,12       | -0,09       | 0,06        | ribosomal protein L23                                                  |
| <b>PDIA6</b>     | 475668    | 0,05             | -0,37      | -0,09       | -0,14       | protein disulfide isomerase family A, member 6                         |
| <b>GLS</b>       | 488448    | 0,00             | -0,04      | -0,08       | 0,08        | glutaminase                                                            |
| <b>SNRNP70</b>   | 484388    | -0,08            | -0,28      | -0,08       | -0,27       | small nuclear ribonucleoprotein 70kDa (U1)                             |
| <b>HSD17B10</b>  | 480930    | -0,24            | -0,37      | -0,08       | -0,21       | hydroxysteroid (17-beta) dehydrogenase 10                              |
| <b>DHX15</b>     | 488856    | 0,25             | 0,36       | -0,07       | 0,14        | DEAH (Asp-Glu-Ala-His) box polypeptide 15                              |
| <b>AKR7A2</b>    | 478210    | 0,32             | -0,13      | -0,07       | -0,41       | aldo-keto reductase family 7, member A2 (aflatoxin aldehyde reductase) |
| <b>MRPS31</b>    | 477294    | -0,04            | -0,30      | -0,07       | -0,31       | mitochondrial ribosomal protein S31                                    |
| <b>TOM1</b>      | 608746    | -0,38            | -0,73      | -0,07       | -0,36       | target of myb1 (chicken)                                               |
| <b>SNRPD1</b>    | 480178    | -0,29            | -0,41      | -0,07       | -0,35       | small nuclear ribonucleoprotein D1 polypeptide 16kDa                   |
| <b>SNRNP200</b>  | 475742    | 0,09             | -0,05      | -0,07       | -0,14       | small nuclear ribonucleoprotein 200kDa (U5)                            |
| <b>GNMB</b>      | 482355    | 0,02             | -0,18      | -0,07       | -0,01       | glycoprotein (transmembrane) nmb                                       |
| <b>LOC474696</b> | 474696    | 0,31             | 0,07       | -0,06       | 0,03        | similar to eukaryotic translation termination factor 1 (predicted)     |
| <b>CS</b>        | 474403    | 0,05             | -0,25      | -0,06       | -0,17       | citrate synthase                                                       |
| <b>ABCF1</b>     | 474826    | 0,28             | 0,02       | -0,06       | -0,19       | ATP-binding cassette, sub-family F (GCN20), member 1                   |
| <b>STX7</b>      | 483987    | -0,25            | 0,10       | -0,06       | -0,06       | syntaxin 7                                                             |
| <b>LOC610135</b> | 610135    | 0,09             | -0,17      | -0,06       | -0,12       | similar to small nuclear ribonucleoprotein polypeptide G               |
| <b>LONP1</b>     | 611425    | 0,16             | -0,08      | -0,06       | -0,07       | lon peptidase 1, mitochondrial                                         |
| <b>JUP</b>       | 480522    | 0,22             | -0,01      | -0,05       | -0,03       | junction plakoglobin                                                   |
| <b>TUBB2A</b>    | 478701    | 0,10             | 0,03       | -0,05       | -0,19       | tubulin, beta 2A                                                       |
| <b>CALU</b>      | 475201    | -0,03            | -0,41      | -0,05       | -0,08       | calumenin                                                              |
| <b>SUCLG1</b>    | 475775    | 0,15             | -0,10      | -0,05       | -0,09       | succinate-CoA ligase, alpha subunit                                    |
| <b>LOC477554</b> | 477554    | 0,03             | -0,20      | -0,05       | -0,11       | similar to small nuclear                                               |

| Symbol         | Entrez Id | log2 fold change |            |             |             | Name                                                        |
|----------------|-----------|------------------|------------|-------------|-------------|-------------------------------------------------------------|
|                |           | 4hrs p.i.        | 8 hrs p.i. | 10 hrs p.i. | 12 hrs p.i. |                                                             |
|                |           |                  |            |             |             | ribonucleoprotein D3                                        |
| <b>PFDN5</b>   | 477597    | -0,08            | -0,85      | -0,05       | -0,27       | prefoldin subunit 5                                         |
| <b>MYOF</b>    | 607472    | -0,46            | -0,20      | -0,04       | -0,53       | myoferlin                                                   |
| <b>FECH</b>    | 610360    | -0,19            | -0,66      | -0,04       | -0,15       | ferrochelataze                                              |
| <b>FH</b>      | 480092    | -0,01            | -0,40      | -0,03       | -0,22       | fumarate hydratase                                          |
| <b>CAPZA2</b>  | 503863    | 0,09             | -0,47      | -0,03       | -0,10       | capping protein (actin filament) muscle Z-line, alpha 2     |
| <b>PDHA1</b>   | 480858    | 0,12             | -0,15      | -0,03       | 0,06        | pyruvate dehydrogenase (lipoamide) alpha 1                  |
| <b>RAB5C</b>   | 403941    | 0,02             | -0,32      | -0,03       | -0,03       | RAB5C, member RAS oncogene family                           |
| <b>ACAT1</b>   | 489421    | 0,07             | -0,14      | -0,03       | 0,00        | acetyl-CoA acetyltransferase 1                              |
| <b>DLD</b>     | 403978    | 0,10             | -0,19      | -0,03       | -0,12       | dihydrolipoamide dehydrogenase                              |
| <b>MYH9</b>    | 481280    | 0,46             | 0,26       | -0,03       | 0,10        | myosin, heavy chain 9, non-muscle                           |
| <b>SF3B3</b>   | 479659    | 0,02             | -0,16      | -0,02       | -0,17       | splicing factor 3b, subunit 3, 130kDa                       |
| <b>EIF5A</b>   | 489468    | 0,45             | 0,19       | -0,02       | 0,01        | eukaryotic translation initiation factor 5A                 |
| <b>DSG2</b>    | 490500    | -0,28            | -0,61      | -0,02       | -0,07       | desmoglein 2                                                |
| <b>MYL12B</b>  | 480193    | 0,43             | 0,31       | -0,02       | 0,19        | myosin, light chain 12B, regulatory                         |
| <b>RPL23A</b>  | 476799    | 0,52             | 0,35       | -0,01       | 0,17        | ribosomal protein L23a                                      |
| <b>NAPA</b>    | 612960    | -0,03            | -0,29      | -0,01       | -0,20       | N-ethylmaleimide-sensitive factor attachment protein, alpha |
| <b>ACO1</b>    | 481576    | 0,09             | -0,53      | -0,01       | -0,27       | aconitase 1, soluble                                        |
| <b>AP2B1</b>   | 480605    | 0,15             | -0,24      | -0,01       | -0,11       | adaptor-related protein complex 2, beta 1 subunit           |
| <b>POLR2E</b>  | 611859    | 0,02             | -0,43      | 0,00        | -0,17       | polymerase (RNA) II (DNA directed) polypeptide E, 25kDa     |
| <b>C1QBP</b>   | 489450    | 0,12             | 0,14       | 0,00        | 0,18        | complement component 1, q subcomponent binding protein      |
| <b>LMNB1</b>   | 474663    | 0,27             | 0,19       | 0,00        | -0,03       | lamin B1                                                    |
| <b>SRSF5</b>   | 490754    | 0,16             | 0,07       | 0,00        | 0,08        | serine/arginine-rich splicing factor 5                      |
| <b>ALDH5A1</b> | 488246    | 0,16             | -0,25      | 0,01        | -0,34       | aldehyde dehydrogenase 5 family, member A1                  |
| <b>EPS8</b>    | 477686    | 0,06             | -0,47      | 0,01        | -0,20       | epidermal growth factor receptor pathway substrate 8        |
| <b>TUFM</b>    | 479796    | -0,11            | -0,33      | 0,01        | -0,19       | Tu translation elongation factor, mitochondrial             |
| <b>SRSF7</b>   | 475730    | -0,05            | -0,26      | 0,01        | -0,22       | serine/arginine-rich splicing factor 7                      |
| <b>NUCB1</b>   | 484391    | -0,16            | -0,13      | 0,01        | -0,17       | nucleobindin 1                                              |
| <b>MATR3</b>   | 474700    | 0,03             | -0,05      | 0,02        | -0,08       | matrin 3                                                    |
| <b>MCM4</b>    | 477871    | 0,52             | -0,03      | 0,02        | 0,40        | minichromosome maintenance complex component 4              |
| <b>MKI67IP</b> | 476111    | 0,06             | 0,05       | 0,03        | 0,01        | MKI67 (FHA domain) interacting nucleolar phosphoprotein     |
| <b>NOL6</b>    | 481582    | -0,30            | -0,25      | 0,03        | -0,25       | nucleolar protein family 6 (RNA-associated)                 |
| <b>NOB1</b>    | 489733    | 0,28             | 0,33       | 0,03        | 0,25        | NIN1/RPN12 binding protein 1 homolog (S. cerevisiae)        |
| <b>EFTUD2</b>  | 490935    | 0,00             | -0,11      | 0,03        | -0,29       | elongation factor Tu GTP binding domain containing 2        |
| <b>TUBB2C</b>  | 491231    | 0,25             | 0,14       | 0,04        | -0,11       | tubulin, beta 2C                                            |
| <b>CCAR1</b>   | 479230    | 0,19             | -0,04      | 0,04        | -0,06       | cell division cycle and apoptosis regulator 1               |
| <b>RBM3</b>    | 609457    | 0,04             | -0,01      | 0,04        | -0,01       | RNA binding motif (RNP1, RRM) protein 3                     |
| <b>SNRPE</b>   | 478934    | 0,06             | -0,25      | 0,04        | -0,15       | small nuclear ribonucleoprotein                             |

| Symbol    | Entrez Id | log2 fold change |            |             |             | Name                                                                                                               |
|-----------|-----------|------------------|------------|-------------|-------------|--------------------------------------------------------------------------------------------------------------------|
|           |           | 4hrs p.i.        | 8 hrs p.i. | 10 hrs p.i. | 12 hrs p.i. |                                                                                                                    |
|           |           |                  |            |             |             | polypeptide E                                                                                                      |
| PMPCA     | 480677    | -0,11            | -0,37      | 0,04        | -0,19       | peptidase (mitochondrial processing) alpha                                                                         |
| NXF1      | 483780    | 0,09             | -0,22      | 0,04        | -0,15       | nuclear RNA export factor 1                                                                                        |
| UBAP2L    | 480135    | 0,20             | -0,28      | 0,04        | -0,02       | ubiquitin associated protein 2-like                                                                                |
| ACO2      | 474487    | 0,07             | -0,20      | 0,04        | -0,05       | aconitase 2, mitochondrial                                                                                         |
| TRIM28    | 403689    | 0,29             | -0,21      | 0,05        | -0,13       | tripartite motif containing 28                                                                                     |
| LOC479969 | 479969    | 0,30             | 0,25       | 0,05        | 0,19        | similar to Protein C14orf166                                                                                       |
| SAR1A     | 479237    | 0,31             | 0,05       | 0,05        | 0,11        | SAR1 homolog A (S. cerevisiae)                                                                                     |
| VAPB      | 477274    | 0,16             | 0,01       | 0,05        | 0,00        | VAMP (vesicle-associated membrane protein)-associated protein B and C                                              |
| CPSF7     | 476066    | 0,01             | -0,17      | 0,06        | -0,05       | cleavage and polyadenylation specific factor 7, 59kDa                                                              |
| CHD4      | 477714    | 0,29             | 0,11       | 0,06        | 0,20        | chromodomain helicase DNA binding protein 4                                                                        |
| ALB       | 403550    | -8,44            | -7,87      | 0,06        | -7,76       | albumin                                                                                                            |
| TMPO      | 482618    | -0,11            | -0,10      | 0,06        | -0,19       | thymopoietin                                                                                                       |
| PRKAG1    | 486559    | 0,34             | -0,28      | 0,06        | 0,07        | protein kinase, AMP-activated, gamma 1 non-catalytic subunit                                                       |
| TOP2A     | 480525    | 0,19             | -0,37      | 0,07        | -0,04       | topoisomerase (DNA) II alpha 170kDa                                                                                |
| SND1      | 475204    | 0,42             | 0,18       | 0,07        | 0,04        | staphylococcal nuclease and tudor domain containing 1                                                              |
| PTRF      | 490966    | 0,41             | 0,01       | 0,07        | 0,06        | polymerase I and transcript release factor                                                                         |
| LOC474576 | 474576    | 0,12             | 0,12       | 0,07        | -0,04       | similar to DnaJ homolog subfamily A member 1 (Heat shock 40 kDa protein 4) (DnaJ protein homolog 2) (HSJ-2) (HSDJ) |
| RPS14     | 403690    | 0,41             | 0,31       | 0,08        | 0,28        | ribosomal protein S14                                                                                              |
| GOT2      | 478103    | 0,08             | -0,16      | 0,08        | -0,01       | glutamic-oxaloacetic transaminase 2, mitochondrial (aspartate aminotransferase 2)                                  |
| ASAH1     | 482897    | 0,03             | -0,54      | 0,08        | 0,04        | N-acylsphingosine amidohydrolase (acid ceramidase) 1                                                               |
| LOC482601 | 482601    | -0,02            | -0,25      | 0,08        | 0,00        | similar to malate dehydrogenase 2, NAD (mitochondrial)                                                             |
| MSN       | 491924    | 0,29             | -0,34      | 0,09        | -0,15       | moesin                                                                                                             |
| TRAP1     | 490032    | 0,04             | -0,29      | 0,09        | -0,07       | TNF receptor-associated protein 1                                                                                  |
| SMU1      | 474740    | 0,35             | 0,18       | 0,09        | -0,13       | smu-1 suppressor of mec-8 and unc-52 homolog (C. elegans)                                                          |
| CAMK2D    | 610764    | 0,51             | -0,10      | 0,09        | -0,02       | calcium/calmodulin-dependent protein kinase II delta                                                               |
| METAP2    | 475429    | 0,33             | 0,05       | 0,09        | 0,09        | methionyl aminopeptidase 2                                                                                         |
| NAA15     | 483817    | 0,20             | -0,19      | 0,09        | 0,04        | N(alpha)-acetyltransferase 15, NatA auxiliary subunit                                                              |
| OGDH      | 475499    | 0,05             | -0,33      | 0,09        | -0,04       | oxoglutarate (alpha-ketoglutarate) dehydrogenase (lipoamide)                                                       |
| LOC609251 | 609251    | 0,24             | -0,36      | 0,09        | -0,05       | similar to niban protein                                                                                           |
| SNX4      | 478595    | 0,22             | -0,60      | 0,10        | -0,12       | sorting nexin 4                                                                                                    |
| GRSF1     | 475170    | 0,13             | -0,05      | 0,10        | -0,01       | G-rich RNA sequence binding factor 1                                                                               |
| OAT       | 477858    | -0,11            | -0,14      | 0,10        | 0,09        | ornithine aminotransferase                                                                                         |
| ARF6      | 490679    | 0,21             | -0,43      | 0,10        | -0,29       | ADP-ribosylation factor 6                                                                                          |
| GRPEL1    | 488784    | 0,20             | -0,15      | 0,10        | 0,03        | GrpE-like 1, mitochondrial (E. coli)                                                                               |
| YARS      | 478148    | 0,18             | -0,28      | 0,11        | 0,22        | tyrosyl-tRNA synthetase                                                                                            |



| Symbol    | Entrez Id | log2 fold change |            |             |             | Name                                                                                                                     |
|-----------|-----------|------------------|------------|-------------|-------------|--------------------------------------------------------------------------------------------------------------------------|
|           |           | 4hrs p.i.        | 8 hrs p.i. | 10 hrs p.i. | 12 hrs p.i. |                                                                                                                          |
| COL17A1   | 403739    | 0,39             | -0,39      | 0,11        | -0,38       | collagen, type XVII, alpha 1                                                                                             |
| NARS      | 607631    | 0,41             | 0,02       | 0,11        | 0,32        | asparaginyl-tRNA synthetase                                                                                              |
| MNDA      | 488622    | -0,07            | -0,49      | 0,11        | 0,34        | myeloid cell nuclear differentiation antigen                                                                             |
| SRP68     | 403952    | 0,30             | 0,26       | 0,11        | 0,01        | signal recognition particle 68kDa                                                                                        |
| LOC479071 | 479071    | 0,35             | 0,33       | 0,11        | 0,20        | similar to Probable ATP-dependent RNA helicase DDX6 (DEAD-box protein 6) (ATP-dependent RNA helicase p54) (Oncogene RCK) |
| PRPF40A   | 476152    | 0,07             | -0,12      | 0,11        | -0,16       | PRP40 pre-mRNA processing factor 40 homolog A (S. cerevisiae)                                                            |
| HNRNPF    | 477757    | 0,14             | 0,11       | 0,11        | 0,03        | heterogeneous nuclear ribonucleoprotein F                                                                                |
| SEC22B    | 475816    | 0,24             | 0,08       | 0,11        | 0,09        | SEC22 vesicle trafficking protein homolog B (S. cerevisiae) (gene/pseudogene)                                            |
| IQGAP1    | 479050    | 0,14             | -0,19      | 0,12        | 0,29        | IQ motif containing GTPase activating protein 1                                                                          |
| HNRNPH3   | 479227    | 0,09             | 0,00       | 0,12        | 0,02        | heterogeneous nuclear ribonucleoprotein H3 (2H9)                                                                         |
| HIBCH     | 607040    | -0,11            | -0,42      | 0,12        | -0,21       | 3-hydroxyisobutyryl-CoA hydrolase                                                                                        |
| LOC478254 | 478254    | 0,24             | 0,20       | 0,12        | 0,25        | similar to CG5913-PA                                                                                                     |
| IDH3B     | 477177    | 0,06             | -0,05      | 0,12        | 0,23        | isocitrate dehydrogenase 3 (NAD+) beta                                                                                   |
| LOC475374 | 475374    | 0,22             | -1,01      | 0,13        | -0,48       | similar to Alcohol dehydrogenase [NADP+] (Aldehyde reductase) (Aldo-keto reductase family 1 member A1)                   |
| RPS20     | 477887    | 0,45             | 0,33       | 0,13        | 0,30        | ribosomal protein S20                                                                                                    |
| PSIP1     | 474712    | 0,15             | -0,35      | 0,13        | -0,05       | PC4 and SFRS1 interacting protein 1                                                                                      |
| VAT1      | 490953    | 0,27             | -0,33      | 0,13        | -0,04       | vesicle amine transport protein 1 homolog (T. californica)                                                               |
| PRMT5     | 480242    | 0,31             | -0,18      | 0,13        | 0,32        | protein arginine methyltransferase 5                                                                                     |
| LOC607058 | 607058    | 0,00             | -0,30      | 0,14        | -0,05       | similar to SVH protein                                                                                                   |
| LOC477550 | 477550    | 0,28             | -0,22      | 0,14        | 0,00        | similar to poly(rC) binding protein 2 (predicted)                                                                        |
| ATPIF1    | 478165    | 0,36             | 0,20       | 0,14        | 0,34        | ATPase inhibitory factor 1                                                                                               |
| RPS7      | 475649    | 0,66             | 0,53       | 0,14        | 0,39        | ribosomal protein S7                                                                                                     |
| ALDH6A1   | 490779    | 0,14             | -0,26      | 0,14        | 0,07        | aldehyde dehydrogenase 6 family, member A1                                                                               |
| DDX17     | 474508    | 0,36             | 0,17       | 0,14        | 0,13        | DEAD (Asp-Glu-Ala-Asp) box polypeptide 17                                                                                |
| LOC476337 | 476337    | 0,19             | -0,66      | 0,15        | 0,05        | similar to D19Bwg1357e protein                                                                                           |
| RPL36AL   | 480311    | 0,70             | 0,42       | 0,15        | 0,45        | ribosomal protein L36a-like                                                                                              |
| GOLPH3L   | 475838    | 0,32             | 0,00       | 0,15        | -0,10       | golgi phosphoprotein 3-like                                                                                              |
| POLR1C    | 474912    | 0,17             | -0,08      | 0,15        | 0,16        | polymerase (RNA) I polypeptide C, 30kDa                                                                                  |
| HNRNPUL2  | 476053    | 0,33             | 0,07       | 0,15        | 0,09        | heterogeneous nuclear ribonucleoprotein U-like 2                                                                         |
| HNRNPA2B1 | 475260    | 0,20             | 0,10       | 0,15        | 0,21        | heterogeneous nuclear ribonucleoprotein A2/B1                                                                            |
| FARSA     | 476695    | 0,38             | -0,09      | 0,15        | 0,07        | phenylalanyl-tRNA synthetase, alpha subunit                                                                              |
| ECHS1     | 480828    | 0,06             | -0,25      | 0,16        | -0,10       | enoyl CoA hydratase, short chain, 1, mitochondrial                                                                       |
| LMNA      | 480124    | 0,42             | 0,36       | 0,16        | 0,21        | lamin A/C                                                                                                                |
| EIF1AX    | 611715    | 0,73             | 0,39       | 0,17        | 0,22        | eukaryotic translation initiation factor 1A, X-linked                                                                    |
| BUB3      | 477857    | 0,51             | 0,13       | 0,17        | 0,30        | budding uninhibited by                                                                                                   |

| Symbol    | Entrez Id | log2 fold change |            |             |             | Name                                                                          |
|-----------|-----------|------------------|------------|-------------|-------------|-------------------------------------------------------------------------------|
|           |           | 4hrs p.i.        | 8 hrs p.i. | 10 hrs p.i. | 12 hrs p.i. |                                                                               |
| COPE      | 476663    | 0,29             | 0,12       | 0,17        | 0,07        | benzimidazoles 3 homolog (yeast)<br>coatomer protein complex, subunit epsilon |
| RPS27     | 490449    | 0,47             | 0,34       | 0,17        | 0,23        | ribosomal protein S27                                                         |
| DDX1      | 475671    | 0,33             | 0,43       | 0,18        | 0,22        | DEAD (Asp-Glu-Ala-Asp) box polypeptide 1                                      |
| SEC13     | 607653    | 0,90             | 0,41       | 0,18        | 0,69        | SEC13 homolog (S. cerevisiae)                                                 |
| RPS6      | 474722    | 0,65             | 0,59       | 0,19        | 0,47        | ribosomal protein S6                                                          |
| CHADL     | 481234    | 0,68             | -0,17      | 0,20        | -0,50       | chondroadherin-like                                                           |
| SNRPB     | 485806    | 0,51             | 0,18       | 0,20        | 0,24        | small nuclear ribonucleoprotein polypeptides B and B1                         |
| VAMP8     | 609784    | 0,36             | 0,10       | 0,20        | 0,18        | vesicle-associated membrane protein 8 (endobrevin)                            |
| RAE1      | 485942    | 0,11             | -0,03      | 0,21        | 0,05        | RAE1 RNA export 1 homolog (S. pombe)                                          |
| WDR61     | 479068    | 0,21             | -0,08      | 0,21        | 0,47        | WD repeat domain 61                                                           |
| CARS      | 475998    | 0,32             | -0,33      | 0,21        | 0,05        | cysteinyl-tRNA synthetase                                                     |
| IFIT5     | 486788    | 0,67             | 0,02       | 0,21        | 0,62        | interferon-induced protein with tetratricopeptide repeats 5                   |
| GRWD1     | 612058    | 0,35             | 0,21       | 0,21        | 0,16        | glutamate-rich WD repeat containing 1                                         |
| ABCE1     | 475454    | 0,37             | -0,01      | 0,22        | 0,13        | ATP-binding cassette, subfamily E (OABP), member 1                            |
| CDK1      | 488997    | 0,27             | -0,17      | 0,22        | -0,20       | cyclin-dependent kinase 1                                                     |
| LOC475682 | 475682    | 0,46             | 0,49       | 0,22        | 0,40        | similar to splicing factor 3B, 14 kDa subunit                                 |
| NACA      | 474408    | 0,62             | 0,13       | 0,22        | 0,12        | nascent polypeptide-associated complex alpha subunit                          |
| IVD       | 478259    | -0,15            | -0,34      | 0,22        | -0,13       | isovaleryl-CoA dehydrogenase                                                  |
| MCM5      | 610519    | 0,47             | 0,15       | 0,22        | 0,10        | minichromosome maintenance complex component 5                                |
| ALDH7A1   | 481486    | 0,26             | -0,44      | 0,23        | -0,17       | aldehyde dehydrogenase 7 family, member A1                                    |
| RAB5B     | 474394    | 0,30             | -0,05      | 0,23        | 0,17        | RAB5B, member RAS oncogene family                                             |
| PRPF19    | 611552    | 0,22             | 0,08       | 0,23        | 0,11        | PRP19/PSO4 pre-mRNA processing factor 19 homolog (S. cerevisiae)              |
| KTN1      | 480332    | 0,32             | 0,17       | 0,23        | 0,25        | kinectin 1 (kinesin receptor)                                                 |
| PSAP      | 479240    | 0,38             | -0,21      | 0,24        | 0,23        | prosaposin                                                                    |
| PPL       | 490021    | 0,38             | -0,10      | 0,24        | -0,01       | periplakin                                                                    |
| PRKCI     | 478686    | 0,25             | -0,37      | 0,24        | -0,03       | protein kinase C, iota                                                        |
| CDK11A    | 489591    | 0,57             | 0,08       | 0,24        | 0,08        | cyclin-dependent kinase 11A                                                   |
| TARS      | 479370    | 0,48             | -0,35      | 0,24        | 0,16        | threonyl-tRNA synthetase                                                      |
| LOC487948 | 487948    | 0,41             | -0,06      | 0,24        | 0,22        | similar to coproporphyrinogen oxidase                                         |
| IDH3A     | 479066    | 0,19             | -0,06      | 0,25        | 0,16        | isocitrate dehydrogenase 3 (NAD+) alpha                                       |
| RHOA      | 403954    | 0,29             | -0,26      | 0,25        | -0,03       | ras homolog gene family, member A                                             |
| TUBA3C    | 610636    | 0,51             | 0,32       | 0,25        | 0,14        | tubulin, alpha 3c                                                             |
| USP39     | 475767    | 0,12             | 0,14       | 0,25        | 0,18        | ubiquitin specific peptidase 39                                               |
| PSMA8     | 490508    | 0,50             | -0,23      | 0,26        | 0,35        | proteasome (prosome, macropain) subunit, alpha type, 8                        |
| KIF5B     | 477968    | 0,44             | 0,29       | 0,26        | 0,32        | kinesin family member 5B                                                      |
| SRRT      | 479731    | 0,25             | -0,14      | 0,26        | 0,20        | serrate RNA effector molecule homolog (Arabidopsis)                           |
| AARS      | 479656    | 0,38             | -0,56      | 0,26        | 0,03        | alanyl-tRNA synthetase                                                        |

| Symbol    | Entrez Id | log2 fold change |            |             |             | Name                                                                                                                                                                                      |
|-----------|-----------|------------------|------------|-------------|-------------|-------------------------------------------------------------------------------------------------------------------------------------------------------------------------------------------|
|           |           | 4hrs p.i.        | 8 hrs p.i. | 10 hrs p.i. | 12 hrs p.i. |                                                                                                                                                                                           |
| FBL       | 476460    | 0,46             | 0,46       | 0,26        | 0,34        | fibrillarin                                                                                                                                                                               |
| SF3B4     | 483177    | 0,18             | 0,00       | 0,26        | -0,06       | splicing factor 3b, subunit 4, 49kDa                                                                                                                                                      |
| FKBP3     | 480306    | 0,44             | 0,13       | 0,26        | 0,10        | FK506 binding protein 3, 25kDa                                                                                                                                                            |
| CLTA      | 474765    | 0,43             | 0,05       | 0,26        | -0,06       | clathrin, light chain A                                                                                                                                                                   |
| DDX5      | 480472    | 0,38             | 0,21       | 0,26        | 0,20        | DEAD (Asp-Glu-Ala-Asp) box polypeptide 5                                                                                                                                                  |
| TROVE2    | 478957    | 0,47             | 0,02       | 0,27        | 0,25        | TROVE domain family, member 2                                                                                                                                                             |
| EIF5B     | 474556    | 0,48             | 0,32       | 0,27        | 0,33        | eukaryotic translation initiation factor 5B                                                                                                                                               |
| DSP       | 488207    | 0,49             | 0,23       | 0,28        | 0,18        | desmoplakin                                                                                                                                                                               |
| LOC474513 | 474513    | 0,42             | -0,04      | 0,29        | 0,35        | similar to eukaryotic translation initiation factor 3 subunit 6 interacting protein                                                                                                       |
| PIP5K1A   | 475846    | 0,24             | -0,28      | 0,29        | 0,16        | phosphatidylinositol-4-phosphate 5-kinase, type I, alpha                                                                                                                                  |
| NSUN2     | 478625    | 0,19             | -0,13      | 0,29        | 0,02        | NOP2/Sun domain family, member 2                                                                                                                                                          |
| ACADM     | 490207    | 0,16             | -0,07      | 0,30        | -0,28       | acyl-CoA dehydrogenase, C-4 to C-12 straight chain                                                                                                                                        |
| LOC610939 | 610939    | 0,03             | -0,61      | 0,30        | -0,09       | similar to LSM5 homolog, U6 small nuclear RNA associated                                                                                                                                  |
| RARS      | 609803    | 0,33             | -0,38      | 0,30        | 0,47        | arginyl-tRNA synthetase                                                                                                                                                                   |
| NUDT21    | 478123    | 0,28             | -0,19      | 0,30        | 0,16        | nudix (nucleoside diphosphate linked moiety X)-type motif 21                                                                                                                              |
| TJP2      | 403854    | 0,00             | -1,01      | 0,31        | -0,17       | tight junction protein 2 (zona occludens 2)                                                                                                                                               |
| WARS      | 480435    | 0,37             | -0,44      | 0,31        | 0,15        | tryptophanyl-tRNA synthetase                                                                                                                                                              |
| LOC488269 | 488269    | -0,06            | -0,42      | 0,31        | -0,52       | similar to Histone H1.4 (Histone H1b)                                                                                                                                                     |
| RRBP1     | 403809    | 0,37             | 0,05       | 0,31        | 0,30        | ribosome binding protein 1 homolog 180kDa (dog)                                                                                                                                           |
| STRAP     | 486663    | 0,54             | 0,31       | 0,31        | 0,37        | serine/threonine kinase receptor associated protein                                                                                                                                       |
| LYPLA2    | 487374    | 0,42             | -0,30      | 0,31        | -0,24       | lysophospholipase II                                                                                                                                                                      |
| LGALS3BP  | 483345    | 0,70             | -0,24      | 0,31        | 0,20        | lectin, galactoside-binding, soluble, 3 binding protein                                                                                                                                   |
| EIF3H     | 475081    | 0,31             | -0,19      | 0,31        | 0,33        | eukaryotic translation initiation factor 3, subunit H                                                                                                                                     |
| HDLBP     | 477431    | 0,63             | 0,25       | 0,31        | 0,30        | high density lipoprotein binding protein                                                                                                                                                  |
| POLR2H    | 478656    | 0,35             | -0,22      | 0,32        | -0,16       | polymerase (RNA) II (DNA directed) polypeptide H                                                                                                                                          |
| CTSD      | 483662    | 0,22             | 0,00       | 0,32        | 0,25        | cathepsin D                                                                                                                                                                               |
| LOC474484 | 474484    | 0,42             | -0,04      | 0,32        | 0,12        | similar to NHP2-like protein 1 (High mobility group-like nuclear protein 2 homolog 1) ([U4/U6.U5] tri-snRNP 15.5 kDa protein) (Sperm specific antigen 1) (Fertilization antigen 1) (FA-1) |
| PSMB6     | 607466    | -0,15            | -0,65      | 0,32        | 0,00        | proteasome (prosome, macropain) subunit, beta type, 6                                                                                                                                     |
| GNB2L1    | 480818    | 0,85             | 0,55       | 0,33        | 0,35        | guanine nucleotide binding protein (G protein), beta polypeptide 2-like 1                                                                                                                 |
| LOC480437 | 480437    | 0,40             | 0,08       | 0,33        | 0,31        | similar to dynein, cytoplasmic, heavy polypeptide 1                                                                                                                                       |
| SNRPA1    | 607102    | 0,42             | 0,21       | 0,33        | 0,45        | small nuclear ribonucleoprotein polypeptide A'                                                                                                                                            |
| ACLY      | 607852    | 0,70             | 0,28       | 0,35        | 0,15        | ATP citrate lyase                                                                                                                                                                         |
| LOC489167 | 489167    | 0,55             | 0,16       | 0,35        | 0,44        | similar to CG9590-PA                                                                                                                                                                      |

| Symbol           | Entrez Id | log2 fold change |            |             |             | Name                                                                                                                                |
|------------------|-----------|------------------|------------|-------------|-------------|-------------------------------------------------------------------------------------------------------------------------------------|
|                  |           | 4hrs p.i.        | 8 hrs p.i. | 10 hrs p.i. | 12 hrs p.i. |                                                                                                                                     |
| <b>MCM3</b>      | 481839    | 0,58             | 0,16       | 0,35        | 0,31        | minichromosome maintenance complex component 3                                                                                      |
| <b>LOC607948</b> | 607948    | 0,55             | 0,44       | 0,36        | 0,46        | similar to THO complex subunit 4 (Tho4) (Ally of AML-1 and LEF-1) (Transcriptional coactivator Aly/REF) (bZIP enhancing factor BEF) |
| <b>CTNBL1</b>    | 477224    | 0,66             | 0,19       | 0,36        | 0,37        | catenin, beta like 1                                                                                                                |
| <b>TIMM10</b>    | 475968    | 0,69             | 0,17       | 0,36        | 0,66        | translocase of inner mitochondrial membrane 10 homolog (yeast)                                                                      |
| <b>SEPT2</b>     | 487886    | 0,56             | -0,02      | 0,36        | 0,39        | septin 2                                                                                                                            |
| <b>HDGF</b>      | 612089    | 0,30             | -0,36      | 0,36        | 0,19        | hepatoma-derived growth factor                                                                                                      |
| <b>SCPEP1</b>    | 480566    | 0,27             | -0,41      | 0,36        | 0,08        | serine carboxypeptidase 1                                                                                                           |
| <b>KPNA4</b>     | 478680    | 0,50             | 0,13       | 0,37        | 0,33        | karyopherin alpha 4 (importin alpha 3)                                                                                              |
| <b>ACTR1A</b>    | 403791    | 0,56             | 0,04       | 0,37        | 0,33        | ARP1 actin-related protein 1 homolog A, centractin alpha (yeast)                                                                    |
| <b>DPY30</b>     | 475715    | 0,20             | 0,08       | 0,37        | 0,31        | dpy-30 homolog (C. elegans)                                                                                                         |
| <b>S100A10</b>   | 475851    | 0,60             | 0,24       | 0,37        | 0,16        | S100 calcium binding protein A10                                                                                                    |
| <b>ETFB</b>      | 476400    | 0,55             | 0,13       | 0,37        | 0,32        | electron-transfer-flavoprotein, beta polypeptide                                                                                    |
| <b>KARS</b>      | 479644    | 0,43             | 0,10       | 0,38        | 0,57        | lysyl-tRNA synthetase                                                                                                               |
| <b>SSB</b>       | 478787    | 0,47             | 0,07       | 0,38        | 0,44        | Sjogren syndrome antigen B (autoantigen La)                                                                                         |
| <b>ARG2</b>      | 480364    | 0,15             | -0,33      | 0,38        | 0,22        | arginase, type II                                                                                                                   |
| <b>HK2</b>       | 475781    | 0,38             | -0,35      | 0,38        | 0,32        | hexokinase 2                                                                                                                        |
| <b>TMOD3</b>     | 487554    | 0,55             | 0,26       | 0,38        | 0,39        | tropomodulin 3 (ubiquitous)                                                                                                         |
| <b>RBMX</b>      | 481063    | 0,38             | 0,15       | 0,38        | 0,29        | RNA binding motif protein, X-linked                                                                                                 |
| <b>RCC2</b>      | 487412    | 0,39             | 0,00       | 0,38        | 0,03        | regulator of chromosome condensation 2                                                                                              |
| <b>OXSR1</b>     | 607809    | 0,47             | -0,24      | 0,38        | 0,12        | oxidative-stress responsive 1                                                                                                       |
| <b>MSH2</b>      | 494002    | 0,21             | -0,13      | 0,38        | 0,11        | mutS homolog 2, colon cancer, nonpolyposis type 1 (E. coli)                                                                         |
| <b>LOC607254</b> | 607254    | 0,53             | -0,16      | 0,38        | 0,15        | similar to EF hand domain containing 2                                                                                              |
| <b>PAK2</b>      | 612814    | 0,25             | -0,73      | 0,39        | -0,30       | p21 protein (Cdc42/Rac)-activated kinase 2                                                                                          |
| <b>RPSA</b>      | 477029    | 0,79             | 0,55       | 0,39        | 0,57        | ribosomal protein SA                                                                                                                |
| <b>TK1</b>       | 483343    | 0,60             | -0,56      | 0,39        | 0,23        | thymidine kinase 1, soluble                                                                                                         |
| <b>LOC476840</b> | 476840    | 0,51             | 0,02       | 0,40        | 0,39        | similar to eukaryotic translation initiation factor 3, subunit 5 epsilon, 47kDa                                                     |
| <b>DDX39B</b>    | 474839    | 0,49             | 0,09       | 0,40        | 0,29        | DEAD (Asp-Glu-Ala-Asp) box polypeptide 39B                                                                                          |
| <b>SLC9A3R1</b>  | 483299    | 0,42             | -0,01      | 0,40        | 0,23        | solute carrier family 9 (sodium/hydrogen exchanger), member 3 regulator 1                                                           |
| <b>VPS4B</b>     | 607306    | 0,50             | -0,35      | 0,40        | 0,37        | vacuolar protein sorting 4 homolog B (S. cerevisiae)                                                                                |
| <b>DDX19A</b>    | 479658    | 0,48             | -0,04      | 0,40        | 0,15        | DEAD (Asp-Glu-Ala-As) box polypeptide 19A                                                                                           |
| <b>TNPO1</b>     | 478093    | 0,65             | 0,08       | 0,40        | 0,20        | transportin 1                                                                                                                       |
| <b>SAFB</b>      | 485028    | 0,73             | 0,41       | 0,41        | 0,69        | scaffold attachment factor B                                                                                                        |
| <b>CIRH1A</b>    | 489738    | 0,51             | 0,34       | 0,41        | 0,35        | cirrhosis, autosomal recessive 1A (cirhin)                                                                                          |
| <b>MCM2</b>      | 484622    | 0,69             | 0,22       | 0,41        | 0,40        | minichromosome maintenance complex component 2                                                                                      |
| <b>FARSB</b>     | 478926    | 0,70             | 0,15       | 0,42        | 0,50        | phenylalanyl-tRNA synthetase, beta subunit                                                                                          |

| Symbol    | Entrez Id | log2 fold change |            |             |             | Name                                                                       |
|-----------|-----------|------------------|------------|-------------|-------------|----------------------------------------------------------------------------|
|           |           | 4hrs p.i.        | 8 hrs p.i. | 10 hrs p.i. | 12 hrs p.i. |                                                                            |
| RPS12     | 476206    | 0,63             | 0,39       | 0,42        | 0,52        | ribosomal protein S12                                                      |
| DNPEP     | 478922    | 0,49             | -0,08      | 0,42        | 0,38        | aspartyl aminopeptidase                                                    |
| RRM2      | 482963    | 0,67             | 0,20       | 0,42        | 0,17        | ribonucleotide reductase M2                                                |
| XPO1      | 474609    | 0,43             | -0,16      | 0,42        | 0,19        | exportin 1 (CRM1 homolog, yeast)                                           |
| CCT6B     | 491146    | 0,57             | 0,20       | 0,42        | 0,43        | chaperonin containing TCP1, subunit 6B (zeta 2)                            |
| HNRNPM    | 476725    | 0,55             | 0,31       | 0,42        | 0,57        | heterogeneous nuclear ribonucleoprotein M                                  |
| OSBP      | 483448    | 0,35             | -0,07      | 0,42        | 0,18        | oxysterol binding protein                                                  |
| MCM6      | 476131    | 0,56             | -0,09      | 0,42        | 0,35        | minichromosome maintenance complex component 6                             |
| TES       | 475293    | 0,67             | -0,39      | 0,42        | 0,16        | testis derived transcript (3 LIM domains)                                  |
| PLCD1     | 485586    | 0,64             | 0,39       | 0,43        | 0,26        | phospholipase C, delta 1                                                   |
| RBM39     | 477216    | 0,54             | 0,17       | 0,43        | 0,37        | RNA binding motif protein 39                                               |
| MAP4      | 484781    | 0,38             | -0,42      | 0,43        | 0,22        | microtubule-associated protein 4                                           |
| ACTC1     | 478250    | 0,43             | -0,18      | 0,43        | 0,28        | actin, alpha, cardiac muscle 1                                             |
| RPL5      | 479949    | 0,82             | 0,45       | 0,43        | 0,59        | ribosomal protein L5                                                       |
| ARPC1B    | 479744    | 0,57             | -0,19      | 0,44        | 0,18        | actin related protein 2/3 complex, subunit 1B, 41kDa                       |
| EIF3J     | 487532    | 0,38             | -0,16      | 0,44        | 0,74        | eukaryotic translation initiation factor 3, subunit J                      |
| GTF2I     | 479714    | -0,70            | -1,10      | 0,44        | -0,40       | general transcription factor Iii                                           |
| PPP2R2A   | 477374    | 0,62             | -0,02      | 0,44        | 0,25        | protein phosphatase 2, regulatory subunit B, alpha                         |
| LOC475156 | 475156    | 0,20             | -0,34      | 0,44        | 0,23        | similar to peroxiredoxin 1                                                 |
| SCFD1     | 480281    | 0,36             | -0,13      | 0,45        | 0,37        | sec1 family domain containing 1                                            |
| LTA4H     | 482611    | 0,46             | -0,32      | 0,45        | -0,02       | leukotriene A4 hydrolase                                                   |
| PAFAH1B3  | 476449    | 0,41             | -0,55      | 0,45        | -0,01       | platelet-activating factor acetylhydrolase 1b, catalytic subunit 3 (29kDa) |
| USO1      | 478430    | 0,48             | 0,06       | 0,45        | 0,34        | USO1 vesicle docking protein homolog (yeast)                               |
| LOC479165 | 479165    | 0,21             | -0,80      | 0,45        | 0,01        | similar to Dihydrofolate reductase                                         |
| BCLAF1    | 483999    | 0,46             | 0,17       | 0,46        | 0,39        | BCL2-associated transcription factor 1                                     |
| GLO1      | 474894    | 0,67             | -0,60      | 0,46        | 0,08        | glyoxalase I                                                               |
| SEPT7     | 475284    | 0,44             | -0,07      | 0,46        | 0,21        | septin 7                                                                   |
| LOC475721 | 475721    | 0,72             | 0,67       | 0,46        | 1,37        | similar to CG5913-PA                                                       |
| ACP6      | 475822    | 0,03             | -0,16      | 0,46        | 0,10        | acid phosphatase 6, lysophosphatidic                                       |
| GORASP2   | 488395    | 0,17             | -0,43      | 0,47        | 0,05        | golgi reassembly stacking protein 2, 55kDa                                 |
| HNRNPH2   | 480989    | 0,12             | 0,04       | 0,47        | 0,30        | heterogeneous nuclear ribonucleoprotein H2 (H')                            |
| CBR1      | 610164    | 0,41             | -0,52      | 0,47        | 0,06        | carbonyl reductase 1                                                       |
| USP7      | 479854    | 0,43             | -0,21      | 0,47        | 0,19        | ubiquitin specific peptidase 7 (herpes virus-associated)                   |
| LOC481459 | 481459    | -0,22            | -0,12      | 0,48        | 0,20        | similar to sequestosome 1                                                  |
| TCEA1     | 477879    | 0,59             | 3,33       | 0,48        | 0,97        | transcription elongation factor A (SII), 1                                 |
| LOC475722 | 475722    | 0,63             | 0,62       | 0,49        | 0,72        | similar to nucleophosmin 1                                                 |
| EIF5      | 480442    | 0,71             | 0,30       | 0,49        | 0,46        | eukaryotic translation initiation factor 5                                 |
| BZW2      | 475250    | 0,68             | 0,04       | 0,49        | 0,51        | basic leucine zipper and W2 domains 2                                      |
| SRP72     | 403944    | 0,66             | 0,51       | 0,49        | 0,34        | signal recognition particle 72kDa                                          |
| KPNA6     | 487314    | 0,72             | 0,49       | 0,49        | 0,43        | karyopherin alpha 6 (importin alpha 7)                                     |
| LAP3      | 479081    | 0,27             | -0,46      | 0,49        | 0,13        | leucine aminopeptidase 3                                                   |
| EPRS      | 478962    | 0,55             | 0,02       | 0,50        | 0,60        | glutamyl-prolyl-tRNA synthetase                                            |

| Symbol  | Entrez Id | log2 fold change |            |             |             | Name                                                                             |
|---------|-----------|------------------|------------|-------------|-------------|----------------------------------------------------------------------------------|
|         |           | 4hrs p.i.        | 8 hrs p.i. | 10 hrs p.i. | 12 hrs p.i. |                                                                                  |
| CAPNS1  | 611746    | 0,68             | -0,16      | 0,50        | 0,25        | calpain, small subunit 1                                                         |
| EIF3E   | 475070    | 0,58             | 0,13       | 0,51        | 0,38        | eukaryotic translation initiation factor 3, subunit E                            |
| SERBP1  | 479535    | 0,93             | 0,71       | 0,51        | 0,83        | SERPINE1 mRNA binding protein 1                                                  |
| PIR     | 480846    | 0,28             | -0,70      | 0,51        | -0,18       | pirin (iron-binding nuclear protein)                                             |
| NUDT5   | 478006    | 0,46             | -0,66      | 0,51        | 0,25        | nudix (nucleoside diphosphate linked moiety X)-type motif 5                      |
| VARS    | 481716    | 0,25             | -0,21      | 0,51        | 0,41        | valyl-tRNA synthetase                                                            |
| CAD     | 483009    | 0,76             | 0,43       | 0,51        | 0,56        | carbamoyl-phosphate synthetase 2, aspartate transcarbamylase, and dihydroorotase |
| CTSB    | 486077    | 0,48             | -0,21      | 0,52        | 0,35        | cathepsin B                                                                      |
| PPP2R1B | 479444    | 0,41             | -0,13      | 0,52        | 0,23        | protein phosphatase 2, regulatory subunit A, beta                                |
| EML4    | 483048    | 0,45             | 0,02       | 0,52        | 0,49        | echinoderm microtubule associated protein like 4                                 |
| CAST    | 479148    | 0,46             | 0,18       | 0,52        | 0,72        | calpastatin                                                                      |
| MCM7    | 479737    | 0,47             | -0,06      | 0,52        | 0,36        | minichromosome maintenance complex component 7                                   |
| COPG    | 476517    | 0,51             | 0,00       | 0,53        | 0,36        | coatamer protein complex, subunit gamma                                          |
| PDCD6IP | 477015    | 0,53             | -0,22      | 0,53        | 0,28        | programmed cell death 6 interacting protein                                      |
| UBE2V1  | 477262    | 0,42             | -0,71      | 0,53        | 0,08        | ubiquitin-conjugating enzyme E2 variant 1                                        |
| CAPZB   | 478209    | 0,67             | 0,12       | 0,54        | 0,51        | capping protein (actin filament) muscle Z-line, beta                             |
| ARPC2   | 478907    | 0,68             | -0,07      | 0,54        | 0,33        | actin related protein 2/3 complex, subunit 2, 34kDa                              |
| QARS    | 476628    | 0,52             | -0,02      | 0,54        | 0,52        | glutamyl-tRNA synthetase                                                         |
| ADK     | 479253    | 0,57             | -0,51      | 0,55        | 0,20        | adenosine kinase                                                                 |
| IPO7    | 485383    | 0,61             | -0,12      | 0,55        | 0,45        | importin 7                                                                       |
| EIF4G2  | 476854    | 0,72             | 0,10       | 0,55        | 0,53        | eukaryotic translation initiation factor 4 gamma, 2                              |
| TLN1    | 474759    | 0,42             | -0,17      | 0,55        | 0,29        | talin 1                                                                          |
| PCBP1   | 481417    | 0,73             | 0,23       | 0,55        | 0,39        | poly(rC) binding protein 1                                                       |
| EIF3M   | 475950    | 0,74             | 0,11       | 0,55        | 0,59        | eukaryotic translation initiation factor 3, subunit M                            |
| ARF1    | 474591    | 0,61             | 0,02       | 0,55        | 0,27        | ADP-ribosylation factor 1                                                        |
| KPNA2   | 480469    | 0,48             | 0,08       | 0,56        | 0,25        | karyopherin alpha 2 (RAG cohort 1, importin alpha 1)                             |
| KPNA3   | 476909    | 0,71             | 0,20       | 0,56        | 0,42        | karyopherin alpha 3 (importin alpha 4)                                           |
| NAP1L4  | 483670    | 0,59             | 0,15       | 0,56        | 0,45        | nucleosome assembly protein 1-like 4                                             |
| PGM1    | 479545    | 0,37             | -0,62      | 0,56        | 0,06        | phosphoglucomutase 1                                                             |
| NAMPT   | 483267    | 0,49             | -0,04      | 0,56        | 0,17        | nicotinamide phosphoribosyltransferase                                           |
| COPS2   | 478295    | 0,20             | -0,25      | 0,56        | 0,31        | COP9 constitutive photomorphogenic homolog subunit 2 (Arabidopsis)               |
| EZR     | 484056    | 0,69             | -0,23      | 0,56        | 0,23        | ezrin                                                                            |
| PSAT1   | 476318    | 0,99             | -0,19      | 0,56        | 0,25        | phosphoserine aminotransferase 1                                                 |
| CLTC    | 480578    | 0,63             | 0,43       | 0,57        | 0,53        | clathrin, heavy chain (Hc)                                                       |
| MTPN    | 403487    | 0,63             | -0,49      | 0,57        | -0,22       | myotrophin                                                                       |
| SAE1    | 476425    | -0,03            | -0,89      | 0,57        | 0,04        | SUMO1 activating enzyme subunit 1                                                |
| HSP70   | 403612    | 0,41             | 0,09       | 0,58        | 0,47        | heat shock protein 70                                                            |
| API5    | 483413    | 0,62             | 0,13       | 0,58        | 0,53        | apoptosis inhibitor 5                                                            |
| TCP1    | 484064    | 0,60             | 0,14       | 0,58        | 0,56        | t-complex 1                                                                      |
| TSTA3   | 475116    | 0,82             | -0,40      | 0,58        | -0,09       | tissue specific transplantation antigen P35B                                     |
| ARF4    | 607073    | 0,56             | -0,08      | 0,58        | 0,39        | ADP-ribosylation factor 4                                                        |

| Symbol    | Entrez Id | log2 fold change |            |             |             | Name                                                                                                                    |
|-----------|-----------|------------------|------------|-------------|-------------|-------------------------------------------------------------------------------------------------------------------------|
|           |           | 4hrs p.i.        | 8 hrs p.i. | 10 hrs p.i. | 12 hrs p.i. |                                                                                                                         |
| DDX3X     | 480886    | 0,79             | 0,45       | 0,58        | 0,50        | DEAD (Asp-Glu-Ala-Asp) box polypeptide 3, X-linked                                                                      |
| AP1B1     | 486344    | 0,05             | 0,01       | 0,58        | 0,13        | adaptor-related protein complex 1, beta 1 subunit                                                                       |
| LOC606787 | 606787    | 0,75             | 0,34       | 0,58        | 0,54        | similar to T-complex protein 1, zeta subunit (TCP-1-zeta) (CCT-zeta) (CCT-zeta-1)                                       |
| ACTN4     | 484526    | 0,70             | 0,04       | 0,58        | 0,38        | actinin, alpha 4                                                                                                        |
| HSBP1     | 609752    | 0,64             | -0,15      | 0,59        | 0,36        | heat shock factor binding protein 1                                                                                     |
| DARS      | 476132    | 0,72             | 0,07       | 0,59        | 0,78        | aspartyl-tRNA synthetase                                                                                                |
| AATF      | 480595    | 0,62             | 0,28       | 0,59        | 0,67        | apoptosis antagonizing transcription factor                                                                             |
| FLNA      | 481084    | 0,69             | -0,12      | 0,60        | 0,48        | filamin A, alpha                                                                                                        |
| TNNT2     | 403532    | 0,66             | -0,43      | 0,60        | 0,24        | troponin T type 2 (cardiac)                                                                                             |
| LOC475208 | 475208    | 0,84             | 0,16       | 0,61        | 0,43        | similar to Microtubule-associated protein RP/EB family member 1 (APC-binding protein EB1) (End-binding protein 1) (EB1) |
| TXNRD1    | 474536    | 0,17             | -0,59      | 0,61        | 0,77        | thioredoxin reductase 1                                                                                                 |
| HNRNPU    | 480100    | 0,79             | 0,49       | 0,61        | 0,65        | heterogeneous nuclear ribonucleoprotein U (scaffold attachment factor A)                                                |
| FXR1      | 478642    | 0,69             | 0,45       | 0,61        | 0,49        | fragile X mental retardation, autosomal homolog 1                                                                       |
| SMARCC1   | 476640    | 0,70             | 0,12       | 0,61        | 0,81        | SWI/SNF related, matrix associated, actin dependent regulator of chromatin, subfamily c, member 1                       |
| PRKAR2A   | 484774    | 0,41             | -0,09      | 0,62        | 0,51        | protein kinase, cAMP-dependent, regulatory, type II, alpha                                                              |
| TAX1BP3   | 491221    | 0,52             | -0,45      | 0,62        | 0,38        | Tax1 (human T-cell leukemia virus type I) binding protein 3                                                             |
| VPS35     | 475346    | 0,66             | 0,01       | 0,62        | 0,44        | vacuolar protein sorting 35 homolog (S. cerevisiae)                                                                     |
| VPS26A    | 479233    | 0,66             | -0,17      | 0,62        | 0,38        | vacuolar protein sorting 26 homolog A (S. pombe)                                                                        |
| EIF3A     | 486914    | 0,62             | 0,06       | 0,62        | 0,53        | eukaryotic translation initiation factor 3, subunit A                                                                   |
| CCT4      | 482271    | 0,68             | 0,27       | 0,62        | 0,60        | chaperonin containing TCP1, subunit 4 (delta)                                                                           |
| SEPT9     | 483339    | 0,79             | 0,06       | 0,62        | 0,51        | septin 9                                                                                                                |
| EIF3I     | 478152    | 0,64             | 0,20       | 0,62        | 0,57        | eukaryotic translation initiation factor 3, subunit I                                                                   |
| OLA1      | 478803    | 0,59             | -0,28      | 0,62        | 0,28        | Obg-like ATPase 1                                                                                                       |
| EEF1E1    | 478717    | 0,57             | -0,05      | 0,63        | 0,68        | eukaryotic translation elongation factor 1 epsilon 1                                                                    |
| LOC608479 | 608479    | 0,66             | -0,05      | 0,63        | 0,62        | similar to Glyceraldehyde-3-phosphate dehydrogenase (GAPDH)                                                             |
| LOC477309 | 477309    | 0,82             | 0,34       | 0,63        | 0,38        | similar to Transcription factor BTF3 homolog 3                                                                          |
| UCK2      | 608979    | 0,69             | -0,11      | 0,63        | 0,59        | uridine-cytidine kinase 2                                                                                               |
| UCHL5     | 478958    | 0,64             | -0,23      | 0,63        | 0,47        | ubiquitin carboxyl-terminal hydrolase L5                                                                                |
| DDX39A    | 476689    | 0,52             | 0,01       | 0,63        | 0,33        | DEAD (Asp-Glu-Ala-Asp) box polypeptide 39A                                                                              |
| UBE2L3    | 477572    | 0,65             | -0,25      | 0,64        | -0,05       | ubiquitin-conjugating enzyme E2L 3                                                                                      |
| MARS      | 474414    | 0,43             | -0,12      | 0,64        | 0,54        | methionyl-tRNA synthetase                                                                                               |
| EDF1      | 480674    | 0,87             | 0,32       | 0,64        | 0,32        | endothelial differentiation-related factor 1                                                                            |
| RBM14     | 610639    | 0,67             | 0,14       | 0,64        | 0,58        | RNA binding motif protein 14                                                                                            |
| ANXA7     | 479246    | 0,58             | -0,42      | 0,64        | 0,16        | annexin A7                                                                                                              |
| EIF3B     | 479766    | 0,75             | 0,28       | 0,65        | 0,64        | eukaryotic translation initiation factor 3, subunit B                                                                   |
| WDR1      | 611070    | 0,78             | -0,03      | 0,65        | 0,42        | WD repeat domain 1                                                                                                      |
| LOC491969 | 491969    | 0,68             | -0,10      | 0,65        | 0,43        | similar to CG7519-PA                                                                                                    |

| Symbol    | Entrez Id | log2 fold change |            |             |             | Name                                                                                      |
|-----------|-----------|------------------|------------|-------------|-------------|-------------------------------------------------------------------------------------------|
|           |           | 4hrs p.i.        | 8 hrs p.i. | 10 hrs p.i. | 12 hrs p.i. |                                                                                           |
| IDH1      | 478889    | 0,74             | -0,36      | 0,65        | 0,46        | isocitrate dehydrogenase 1 (NADP+), soluble                                               |
| ACACA     | 491130    | 0,74             | 0,14       | 0,65        | 0,48        | acetyl-CoA carboxylase alpha                                                              |
| IPO4      | 480260    | 0,44             | -0,33      | 0,66        | 0,34        | importin 4                                                                                |
| ARCN1     | 479415    | 0,66             | 0,07       | 0,66        | 0,57        | archain 1                                                                                 |
| MAPK1     | 477575    | 0,65             | 0,34       | 0,66        | 0,60        | mitogen-activated protein kinase 1                                                        |
| HRSP12    | 475043    | 0,63             | -0,24      | 0,66        | 0,43        | heat-responsive protein 12                                                                |
| EIF3K     | 476468    | 0,67             | 0,06       | 0,66        | 0,60        | eukaryotic translation initiation factor 3, subunit K                                     |
| YWHAG     | 489818    | 0,55             | -0,01      | 0,66        | 0,55        | tyrosine 3-monooxygenase/tryptophan 5-monooxygenase activation protein, gamma polypeptide |
| PPP1R7    | 477430    | 0,66             | -0,34      | 0,66        | 0,62        | protein phosphatase 1, regulatory (inhibitor) subunit 7                                   |
| SERPINB5  | 476177    | 0,40             | -0,88      | 0,67        | -0,16       | serpin peptidase inhibitor, clade B (ovalbumin), member 5                                 |
| CAPZA1    | 475857    | 0,64             | -0,02      | 0,67        | 0,55        | capping protein (actin filament) muscle Z-line, alpha 1                                   |
| GLOD4     | 480640    | 0,61             | -0,61      | 0,67        | 0,29        | glyoxalase domain containing 4                                                            |
| CSE1L     | 477257    | 0,49             | -0,06      | 0,67        | 0,42        | CSE1 chromosome segregation 1-like (yeast)                                                |
| PSMD14    | 478765    | 0,55             | 0,05       | 0,67        | 0,63        | proteasome (prosome, macropain) 26S subunit, non-ATPase, 14                               |
| NSF       | 490921    | 0,64             | -0,02      | 0,67        | 0,86        | N-ethylmaleimide-sensitive factor                                                         |
| GARS      | 475268    | 0,70             | -0,11      | 0,67        | 0,55        | glycyl-tRNA synthetase                                                                    |
| PSME3     | 480512    | 0,78             | 0,06       | 0,67        | 0,50        | proteasome (prosome, macropain) activator subunit 3 (PA28 gamma; Ki)                      |
| EIF3D     | 608665    | 0,85             | 0,40       | 0,67        | 0,71        | eukaryotic translation initiation factor 3, subunit D                                     |
| PEA15     | 610113    | 0,85             | -0,76      | 0,67        | 0,15        | phosphoprotein enriched in astrocytes 15                                                  |
| PSMD11    | 480610    | 0,64             | 0,02       | 0,68        | 0,63        | proteasome (prosome, macropain) 26S subunit, non-ATPase, 11                               |
| PSME1     | 480256    | 0,88             | -0,16      | 0,68        | 0,45        | proteasome (prosome, macropain) activator subunit 1 (PA28 alpha)                          |
| PSMC5     | 480478    | 0,48             | -0,18      | 0,68        | 0,45        | proteasome (prosome, macropain) 26S subunit, ATPase, 5                                    |
| COPB1     | 476866    | 0,60             | 0,16       | 0,68        | 0,43        | coatamer protein complex, subunit beta 1                                                  |
| RRM1      | 476823    | 0,54             | -0,09      | 0,68        | 0,30        | ribonucleotide reductase M1                                                               |
| TUBA4A    | 478918    | 0,75             | 0,54       | 0,68        | 0,39        | tubulin, alpha 4a                                                                         |
| PMPCB     | 475897    | 0,19             | -0,23      | 0,68        | -0,08       | peptidase (mitochondrial processing) beta                                                 |
| LOC476790 | 476790    | 0,79             | 0,45       | 0,69        | 0,68        | similar to chaperonin containing TCP1, subunit 3 isoform c                                |
| PSMC4     | 476459    | 0,51             | -0,24      | 0,69        | 0,66        | proteasome (prosome, macropain) 26S subunit, ATPase, 4                                    |
| ACTR2     | 481396    | 0,69             | -0,07      | 0,69        | 0,31        | ARP2 actin-related protein 2 homolog (yeast)                                              |
| ACTN1     | 480369    | 0,81             | 0,09       | 0,69        | 0,47        | actinin, alpha 1                                                                          |
| KRT7      | 477602    | 1,08             | 0,91       | 0,69        | 0,75        | keratin 7                                                                                 |
| MAPK1IP1L | 480329    | 0,51             | -0,14      | 0,69        | 0,79        | mitogen-activated protein kinase 1 interacting protein 1-like                             |
| NUP85     | 475913    | 0,48             | -0,04      | 0,69        | 0,37        | nucleoporin 85kDa                                                                         |
| DDX46     | 474685    | 0,70             | -0,10      | 0,69        | 0,61        | DEAD (Asp-Glu-Ala-Asp)                                                                    |



| Symbol           | Entrez Id | log2 fold change |            |             |             | Name                                                                           |
|------------------|-----------|------------------|------------|-------------|-------------|--------------------------------------------------------------------------------|
|                  |           | 4hrs p.i.        | 8 hrs p.i. | 10 hrs p.i. | 12 hrs p.i. |                                                                                |
|                  |           |                  |            |             |             | box polypeptide 46                                                             |
| <b>AIMP1</b>     | 487893    | 0,44             | -0,24      | 0,69        | 0,69        | aminoacyl tRNA synthetase complex-interacting multifunctional protein 1        |
| <b>PSMC2</b>     | 475896    | 0,35             | -0,37      | 0,69        | 0,46        | proteasome (prosome, macropain) 26S subunit, ATPase, 2                         |
| <b>RPS21</b>     | 485959    | 1,01             | 0,86       | 0,69        | 0,87        | ribosomal protein S21                                                          |
| <b>HPRT1</b>     | 442945    | 0,86             | -0,18      | 0,70        | 0,35        | hypoxanthine phosphoribosyltransferase 1                                       |
| <b>FLNB</b>      | 484713    | 0,78             | -0,09      | 0,70        | 0,55        | filamin B, beta                                                                |
| <b>CAND1</b>     | 474437    | 0,66             | -0,02      | 0,70        | 0,48        | cullin-associated and neddylation-dissociated 1                                |
| <b>PSMA5</b>     | 490123    | 0,74             | 0,01       | 0,70        | 0,63        | proteasome (prosome, macropain) subunit, alpha type, 5                         |
| <b>PSMD5</b>     | 474703    | 0,45             | -0,22      | 0,70        | 0,30        | proteasome (prosome, macropain) 26S subunit, non-ATPase, 5                     |
| <b>DNM1L</b>     | 477649    | 0,58             | -0,35      | 0,70        | 0,57        | dynamitin 1-like                                                               |
| <b>LOC475101</b> | 475101    | 0,76             | -0,17      | 0,71        | 0,31        | similar to L-lactate dehydrogenase B chain (LDH-B) (LDH heart subunit) (LDH-H) |
| <b>MAP2K3</b>    | 489547    | 0,71             | -0,10      | 0,71        | 0,43        | mitogen-activated protein kinase kinase 3                                      |
| <b>MAT2A</b>     | 475770    | 0,89             | 0,24       | 0,71        | 0,47        | methionine adenosyltransferase II, alpha                                       |
| <b>COMMD9</b>    | 608575    | 0,89             | 0,37       | 0,71        | 0,49        | COMM domain containing 9                                                       |
| <b>APEX1</b>     | 482558    | 0,81             | 0,26       | 0,71        | 0,71        | APEX nuclease (multifunctional DNA repair enzyme) 1                            |
| <b>EIF3C</b>     | 479795    | 0,74             | 0,20       | 0,71        | 0,71        | eukaryotic translation initiation factor 3, subunit C                          |
| <b>ASNS</b>      | 475240    | 0,90             | 0,28       | 0,71        | 0,59        | asparagine synthetase (glutamine-hydrolyzing)                                  |
| <b>HSPA8</b>     | 479406    | 0,73             | 0,29       | 0,71        | 0,64        | heat shock 70kDa protein 8                                                     |
| <b>HDAC2</b>     | 475035    | 0,64             | 0,29       | 0,72        | 0,67        | histone deacetylase 2                                                          |
| <b>PABPN1</b>    | 490611    | 0,74             | 0,57       | 0,72        | 0,82        | poly(A) binding protein, nuclear 1                                             |
| <b>PTGR1</b>     | 474802    | 0,65             | -0,21      | 0,72        | 0,41        | prostaglandin reductase 1                                                      |
| <b>PDCD6</b>     | 609549    | 0,87             | -0,14      | 0,72        | 0,14        | programmed cell death 6                                                        |
| <b>G3BP1</b>     | 479322    | 0,91             | 0,62       | 0,73        | 0,79        | GTPase activating protein (SH3 domain) binding protein 1                       |
| <b>CALM2</b>     | 474584    | 0,89             | 0,35       | 0,73        | 0,66        | calmodulin 2 (phosphorylase kinase, delta)                                     |
| <b>DIABLO</b>    | 477463    | 0,68             | 0,21       | 0,73        | 0,84        | diablo, IAP-binding mitochondrial protein                                      |
| <b>U2AF1</b>     | 478422    | 0,44             | 0,42       | 0,73        | 0,52        | U2 small nuclear RNA auxiliary factor 1                                        |
| <b>BZW1</b>      | 478865    | 0,99             | 0,18       | 0,73        | 0,62        | basic leucine zipper and W2 domains 1                                          |
| <b>TNPO3</b>     | 482263    | 0,57             | 0,12       | 0,73        | 0,40        | transportin 3                                                                  |
| <b>UGDH</b>      | 479107    | 0,37             | -0,22      | 0,73        | 0,57        | UDP-glucose 6-dehydrogenase                                                    |
| <b>HSPH1</b>     | 477322    | 0,70             | 0,05       | 0,73        | 0,63        | heat shock 105kDa/110kDa protein 1                                             |
| <b>G3BP2</b>     | 478429    | 0,81             | 0,42       | 0,73        | 0,76        | GTPase activating protein (SH3 domain) binding protein 2                       |
| <b>LOC486736</b> | 486736    | 0,68             | -0,29      | 0,73        | 0,13        | similar to chromosome 12 open reading frame 5                                  |
| <b>KHDRBS1</b>   | 487316    | 0,59             | -0,05      | 0,74        | 0,55        | KH domain containing, RNA binding, signal transduction associated 1            |
| <b>SF3A1</b>     | 477538    | 0,49             | -0,27      | 0,74        | 0,41        | splicing factor 3a, subunit 1, 120kDa                                          |
| <b>VPS29</b>     | 477477    | 0,45             | -0,13      | 0,74        | 0,61        | vacuolar protein sorting 29 homolog (S. cerevisiae)                            |
| <b>SPR</b>       | 483118    | 0,67             | -0,45      | 0,74        | 0,27        | sepiapterin reductase (7,8-                                                    |

| Symbol  | Entrez Id | log2 fold change |            |             |             | Name                                                            |
|---------|-----------|------------------|------------|-------------|-------------|-----------------------------------------------------------------|
|         |           | 4hrs p.i.        | 8 hrs p.i. | 10 hrs p.i. | 12 hrs p.i. |                                                                 |
| GSPT1   | 479846    | 0,94             | 0,08       | 0,74        | 0,63        | dihydrobiopterin:NADP+ oxidoreductase)                          |
| CASP8   | 488473    | 1,01             | -0,05      | 0,74        | 0,65        | G1 to S phase transition 1                                      |
| PSMD2   | 478654    | 0,64             | -0,20      | 0,74        | 0,44        | caspase 8, apoptosis-related cysteine peptidase                 |
| CCT2    | 474445    | 0,79             | 0,27       | 0,74        | 0,77        | proteasome (prosome, macropain) 26S subunit, non-ATPase, 2      |
| PSMD8   | 476470    | 0,46             | -0,51      | 0,74        | 0,49        | chaperonin containing TCP1, subunit 2 (beta)                    |
| PFKP    | 478019    | 0,83             | 0,25       | 0,74        | 0,68        | proteasome (prosome, macropain) 26S subunit, non-ATPase, 8      |
| ARPC5L  | 612856    | 0,89             | 0,43       | 0,75        | 0,66        | phosphofructokinase, platelet                                   |
| ALDH1L1 | 476506    | 0,43             | -0,14      | 0,75        | 0,57        | actin related protein 2/3 complex, subunit 5-like               |
| RUVBL1  | 476512    | 0,67             | 0,29       | 0,75        | 0,57        | aldehyde dehydrogenase 1 family, member L1                      |
| TWF1    | 486600    | 0,81             | 0,06       | 0,75        | 0,52        | RuvB-like 1 (E. coli)                                           |
| PGM3    | 474981    | 0,70             | -0,31      | 0,75        | 0,15        | twinfilin, actin-binding protein, homolog 1 (Drosophila)        |
| ZW10    | 479433    | 0,86             | 0,52       | 0,75        | 0,89        | phosphoglucomutase 3                                            |
| CSTF2   | 492015    | 0,40             | -0,25      | 0,75        | 0,38        | ZW10, kinetochore associated, homolog (Drosophila)              |
| NUTF2   | 479681    | 0,55             | -0,34      | 0,75        | 0,40        | cleavage stimulation factor, 3' pre-RNA, subunit 2, 64kDa       |
| PLA2G4A | 480048    | 0,78             | -0,03      | 0,75        | 0,53        | nuclear transport factor 2                                      |
| SHMT1   | 489536    | 0,47             | -0,17      | 0,75        | 0,08        | phospholipase A2, group IVA (cytosolic, calcium-dependent)      |
| CCT5    | 606873    | 0,86             | 0,28       | 0,76        | 0,70        | serine hydroxymethyltransferase 1 (soluble)                     |
| DDX42   | 480479    | 0,60             | 0,29       | 0,76        | 0,56        | chaperonin containing TCP1, subunit 5 (epsilon)                 |
| NUP93   | 478119    | 0,59             | 0,03       | 0,76        | 0,50        | DEAD (Asp-Glu-Ala-Asp) box polypeptide 42                       |
| RSU1    | 477993    | 0,53             | -0,23      | 0,76        | 0,39        | nucleoporin 93kDa                                               |
| PSME2   | 480258    | 0,86             | 0,04       | 0,76        | 0,64        | Ras suppressor protein 1                                        |
| CLIC1   | 474847    | 0,69             | -0,25      | 0,76        | 0,22        | proteasome (prosome, macropain) activator subunit 2 (PA28 beta) |
| SUMO2   | 474963    | 0,68             | -0,40      | 0,76        | 0,48        | chloride intracellular channel 1                                |
| ACTR3   | 403702    | 0,91             | 0,16       | 0,77        | 0,64        | SMT3 suppressor of mif two 3 homolog 2 (S. cerevisiae)          |
| EIF4A2  | 488118    | 0,89             | 0,13       | 0,77        | 0,44        | ARP3 actin-related protein 3 homolog (yeast)                    |
| UTP14A  | 492128    | 0,85             | -0,39      | 0,77        | 0,89        | eukaryotic translation initiation factor 4A2                    |
| SPTAN1  | 403484    | 0,83             | 0,34       | 0,77        | 0,71        | UTP14, U3 small nucleolar ribonucleoprotein, homolog A (yeast)  |
| CTH     | 479991    | 0,66             | -0,37      | 0,77        | 0,38        | spectrin, alpha, non-erythrocytic 1 (alpha-fodrin)              |
| ACTB    | 403580    | 0,82             | 0,15       | 0,78        | 0,60        | cystathionase (cystathionine gamma-lyase)                       |
| ARPC3   | 477474    | 0,77             | -0,03      | 0,78        | 0,52        | actin, beta                                                     |
| TPR     | 480045    | 0,58             | -0,06      | 0,78        | 0,55        | actin related protein 2/3 complex, subunit 3, 21kDa             |
| RUVBL2  | 476418    | 0,79             | 0,34       | 0,78        | 0,73        | translocated promoter region (to activated MET oncogene)        |
| PSMC1   | 478703    | 0,58             | 0,14       | 0,78        | 0,72        | RuvB-like 2 (E. coli)                                           |
| UPP1    | 480772    | 1,02             | -0,21      | 0,78        | 0,48        | proteasome (prosome, macropain) 26S subunit, ATPase, 1          |
|         |           |                  |            |             |             | uridine phosphorylase 1                                         |

| Symbol    | Entrez Id | log2 fold change |            |             |             | Name                                                                                                                                    |
|-----------|-----------|------------------|------------|-------------|-------------|-----------------------------------------------------------------------------------------------------------------------------------------|
|           |           | 4hrs p.i.        | 8 hrs p.i. | 10 hrs p.i. | 12 hrs p.i. |                                                                                                                                         |
| DUT       | 609526    | 0,36             | -0,50      | 0,78        | 0,44        | deoxyuridine triphosphatase                                                                                                             |
| ANXA4     | 606756    | 0,89             | -0,11      | 0,78        | 0,33        | annexin A4                                                                                                                              |
| EEF1B2    | 478881    | 0,95             | 0,41       | 0,79        | 0,83        | eukaryotic translation elongation factor 1 beta 2                                                                                       |
| cOR2W9    | 488336    | 0,89             | 0,02       | 0,79        | 0,54        | cOR2W9 olfactory receptor family 2 subfamily W-like                                                                                     |
| FDPS      | 480129    | 0,76             | -0,26      | 0,79        | 0,42        | farnesyl diphosphate synthase                                                                                                           |
| DPYSL2    | 486107    | 0,67             | -0,23      | 0,79        | 0,66        | dihydropyrimidinase-like 2                                                                                                              |
| ARPC4     | 476540    | 0,94             | 0,18       | 0,79        | 0,61        | actin related protein 2/3 complex, subunit 4, 20kDa                                                                                     |
| CACYBP    | 480062    | 0,82             | -0,05      | 0,80        | 0,59        | calcyclin binding protein                                                                                                               |
| UFM1      | 477297    | 0,73             | -0,09      | 0,80        | 0,28        | ubiquitin-fold modifier 1                                                                                                               |
| HSPA4     | 474680    | 0,75             | 0,06       | 0,80        | 0,69        | heat shock 70kDa protein 4                                                                                                              |
| CNDP2     | 476166    | 0,99             | 0,04       | 0,80        | 0,73        | CNDP dipeptidase 2 (metallopeptidase M20 family)                                                                                        |
| PSMC6     | 478522    | 0,72             | 0,05       | 0,81        | 0,62        | proteasome (prosome, macropain) 26S subunit, ATPase, 6                                                                                  |
| PSMD12    | 480465    | 0,77             | 0,11       | 0,81        | 0,74        | proteasome (prosome, macropain) 26S subunit, non-ATPase, 12                                                                             |
| PARK7     | 479595    | 0,63             | -0,36      | 0,81        | 0,17        | parkinson protein 7                                                                                                                     |
| ANXA2     | 403435    | 1,11             | 0,69       | 0,81        | 0,72        | annexin A2                                                                                                                              |
| NPEPPS    | 480538    | 0,79             | -0,19      | 0,81        | 0,43        | aminopeptidase puromycin sensitive                                                                                                      |
| LOC489680 | 489680    | 1,09             | -0,29      | 0,81        | 0,48        | similar to coactosin-like 1                                                                                                             |
| RBBP7     | 480854    | 0,85             | 0,33       | 0,82        | 0,83        | retinoblastoma binding protein 7                                                                                                        |
| CFL2      | 490649    | 0,50             | -0,35      | 0,83        | 0,48        | cofilin 2 (muscle)                                                                                                                      |
| LOC609233 | 609233    | 1,10             | 0,43       | 0,83        | 0,75        | similar to dynein, cytoplasmic, light peptide                                                                                           |
| IPO5      | 485528    | 0,82             | 0,12       | 0,83        | 0,71        | importin 5                                                                                                                              |
| PSMA6     | 480290    | 0,84             | 0,07       | 0,83        | 0,77        | proteasome (prosome, macropain) subunit, alpha type, 6                                                                                  |
| UBA2      | 476490    | 0,56             | -0,21      | 0,83        | 0,68        | ubiquitin-like modifier activating enzyme 2                                                                                             |
| MBNL1     | 477116    | 0,75             | 0,28       | 0,83        | 0,97        | muscleblind-like (Drosophila)                                                                                                           |
| KRT17     | 490977    | 1,22             | 0,24       | 0,84        | 0,48        | keratin 17                                                                                                                              |
| SNRPA     | 476454    | 0,79             | 0,16       | 0,84        | 0,45        | small nuclear ribonucleoprotein polypeptide A                                                                                           |
| ATP6V1B2  | 486137    | 0,67             | 0,11       | 0,84        | 0,64        | ATPase, H+ transporting, lysosomal 56/58kDa, V1 subunit B2                                                                              |
| PRPS2     | 476855    | 1,08             | 0,68       | 0,84        | 0,88        | phosphoribosyl pyrophosphate synthetase 2                                                                                               |
| VIM       | 477991    | 0,84             | 0,55       | 0,85        | 0,60        | vimentin                                                                                                                                |
| PCNA      | 477166    | 0,95             | 0,24       | 0,85        | 0,72        | proliferating cell nuclear antigen                                                                                                      |
| RANBP1    | 477563    | 0,71             | -0,11      | 0,85        | 0,46        | RAN binding protein 1                                                                                                                   |
| PCMT1     | 476242    | 0,60             | -0,21      | 0,85        | 0,51        | protein-L-isoaspartate (D-aspartate) O-methyltransferase                                                                                |
| HNRNPK    | 476309    | 0,90             | 0,31       | 0,85        | 0,85        | heterogeneous nuclear ribonucleoprotein K                                                                                               |
| KHSRP     | 485022    | 0,91             | 0,36       | 0,85        | 0,75        | KH-type splicing regulatory protein                                                                                                     |
| CNN3      | 479937    | 0,61             | -0,39      | 0,86        | 0,38        | calponin 3, acidic                                                                                                                      |
| MTHFD1    | 480352    | 0,87             | -0,02      | 0,86        | 0,57        | methylenetetrahydrofolate dehydrogenase (NADP+ dependent) 1, methenyltetrahydrofolate cyclohydrolase, formyltetrahydrofolate synthetase |
| ARHGAP1   | 483631    | 0,86             | -0,42      | 0,86        | 0,29        | Rho GTPase activating                                                                                                                   |

| Symbol           | Entrez Id | log2 fold change |            |             |             | Name                                                                               |
|------------------|-----------|------------------|------------|-------------|-------------|------------------------------------------------------------------------------------|
|                  |           | 4hrs p.i.        | 8 hrs p.i. | 10 hrs p.i. | 12 hrs p.i. |                                                                                    |
|                  |           |                  |            |             |             | protein 1                                                                          |
| <b>TPI1</b>      | 477711    | 0,90             | -0,09      | 0,86        | 0,60        | triosephosphate isomerase 1                                                        |
| <b>ATIC</b>      | 488513    | 0,92             | -0,09      | 0,86        | 0,60        | 5-aminoimidazole-4-carboxamide ribonucleotide formyltransferase/IMP cyclohydrolase |
| <b>ERH</b>       | 480371    | 0,97             | 0,55       | 0,86        | 0,84        | enhancer of rudimentary homolog (Drosophila)                                       |
| <b>PRDX5</b>     | 476032    | 0,75             | -0,28      | 0,86        | 0,36        | peroxiredoxin 5                                                                    |
| <b>EEF1A1</b>    | 403506    | 0,99             | 0,36       | 0,86        | 0,70        | eukaryotic translation elongation factor 1 alpha 1                                 |
| <b>CBX3</b>      | 482015    | 0,89             | 0,39       | 0,86        | 0,76        | chromobox homolog 3                                                                |
| <b>CAP1</b>      | 475317    | 0,87             | 0,07       | 0,87        | 0,79        | CAP, adenylate cyclase-associated protein 1 (yeast)                                |
| <b>PSMA4</b>     | 475132    | 0,77             | -0,14      | 0,87        | 0,77        | proteasome (prosome, macropain) subunit, alpha type, 4                             |
| <b>BLVRB</b>     | 476456    | 0,56             | -0,41      | 0,87        | 0,12        | biliverdin reductase B (flavin reductase (NADPH))                                  |
| <b>SARS</b>      | 490124    | 0,58             | -0,39      | 0,87        | 0,60        | seryl-tRNA synthetase                                                              |
| <b>KATNAL2</b>   | 490465    | 0,46             | -0,23      | 0,87        | 0,51        | katanin p60 subunit A-like 2                                                       |
| <b>MDH1</b>      | 474614    | 1,04             | 0,09       | 0,87        | 0,63        | malate dehydrogenase 1, NAD (soluble)                                              |
| <b>COPS4</b>     | 478455    | 0,35             | -0,42      | 0,88        | 0,48        | COP9 constitutive photomorphogenic homolog subunit 4 (Arabidopsis)                 |
| <b>GLRX3</b>     | 477869    | 0,91             | 0,03       | 0,88        | 0,44        | glutaredoxin 3                                                                     |
| <b>PSMB5</b>     | 480246    | 0,93             | 0,09       | 0,88        | 0,83        | proteasome (prosome, macropain) subunit, beta type, 5                              |
| <b>FASN</b>      | 483378    | 0,90             | 0,07       | 0,88        | 0,59        | fatty acid synthase                                                                |
| <b>FUBP1</b>     | 490201    | 0,73             | 0,02       | 0,88        | 0,48        | far upstream element (FUSE) binding protein 1                                      |
| <b>CCT8</b>      | 478399    | 0,91             | 0,35       | 0,88        | 0,86        | chaperonin containing TCP1, subunit 8 (theta)                                      |
| <b>OTUB1</b>     | 476039    | 0,96             | -0,01      | 0,88        | 0,51        | OTU domain, ubiquitin aldehyde binding 1                                           |
| <b>HSPB1</b>     | 403979    | 0,37             | -0,35      | 0,88        | 0,43        | heat shock 27kDa protein 1                                                         |
| <b>ADSL</b>      | 474499    | 0,88             | -0,03      | 0,89        | 0,59        | adenylosuccinate lyase                                                             |
| <b>KRT8</b>      | 486513    | 1,25             | 0,97       | 0,89        | 0,96        | keratin 8                                                                          |
| <b>DDB1</b>      | 476067    | 0,73             | -0,04      | 0,89        | 0,68        | damage-specific DNA binding protein 1, 127kDa                                      |
| <b>PRMT1</b>     | 476411    | 0,97             | 0,67       | 0,89        | 0,79        | protein arginine methyltransferase 1                                               |
| <b>S100A6</b>    | 480143    | 1,01             | -0,25      | 0,89        | 0,47        | S100 calcium binding protein A6                                                    |
| <b>PDAP1</b>     | 489861    | 1,10             | 0,29       | 0,89        | 1,04        | PDGFA associated protein 1                                                         |
| <b>DDT</b>       | 607589    | 0,93             | -0,29      | 0,89        | 0,51        | D-dopachrome tautomerase                                                           |
| <b>PTGES3</b>    | 612760    | 0,92             | -0,14      | 0,89        | 0,71        | prostaglandin E synthase 3 (cytosolic)                                             |
| <b>DCTN2</b>     | 474415    | 0,72             | 0,11       | 0,89        | 0,97        | dynactin 2 (p50)                                                                   |
| <b>NME2</b>      | 480559    | 1,04             | 0,24       | 0,90        | 0,68        | non-metastatic cells 2, protein (NM23B) expressed in                               |
| <b>LOC607890</b> | 607890    | 1,15             | 0,36       | 0,90        | 0,86        | similar to D-3-phosphoglycerate dehydrogenase (3-PGDH)                             |
| <b>NUDC</b>      | 487349    | 0,68             | -0,25      | 0,90        | 0,60        | nuclear distribution gene C homolog (A. nidulans)                                  |
| <b>CDC37</b>     | 484955    | 0,74             | -0,02      | 0,90        | 0,90        | cell division cycle 37 homolog (S. cerevisiae)                                     |
| <b>ANXA3</b>     | 478447    | 1,11             | 0,16       | 0,90        | 0,66        | annexin A3                                                                         |
| <b>LDHA</b>      | 476882    | 1,03             | 0,22       | 0,90        | 0,73        | lactate dehydrogenase A                                                            |
| <b>PSMD6</b>     | 484700    | 0,83             | 0,21       | 0,90        | 0,77        | proteasome (prosome, macropain) 26S subunit, non-ATPase, 6                         |
| <b>PSMC3</b>     | 475980    | 0,68             | 0,06       | 0,90        | 0,60        | proteasome (prosome, macropain) 26S subunit, ATPase, 3                             |

| Symbol    | Entrez Id | log2 fold change |                              |             |             | Name                                                                                                                       |
|-----------|-----------|------------------|------------------------------|-------------|-------------|----------------------------------------------------------------------------------------------------------------------------|
|           |           | 4hrs p.i.        | 8 hrs p.i.                   | 10 hrs p.i. | 12 hrs p.i. |                                                                                                                            |
| PSMA1     | 476867    | 0,87             | -0,05                        | 0,91        | 0,82        | proteasome (prosome, macropain) subunit, alpha type, 1                                                                     |
| PAICS     | 475150    | 0,76             | -0,12                        | 0,91        | 0,67        | phosphoribosylaminoimidazole carboxylase, phosphoribosylaminoimidazole succinocarboxamide synthetase                       |
| PUF60     | 607245    | 0,61             | -0,08                        | 0,91        | 0,49        | poly-U binding splicing factor 60KDa                                                                                       |
| CAPN2     | 480118    | 1,11             | 0,04                         | 0,91        | 0,81        | calpain 2, (m/II) large subunit                                                                                            |
| PPM1G     | 475703    | 0,60             | -0,06                        | 0,91        | 0,72        | protein phosphatase, Mg2+/Mn2+ dependent, 1G                                                                               |
| PSMA7     | 404305    | 0,81             | 0,09                         | 0,91        | 0,69        | proteasome (prosome, macropain) subunit, alpha type, 7                                                                     |
| NASP      | 475373    | 0,79             | 0,23                         | 0,91        | 0,90        | nuclear autoantigenic sperm protein (histone-binding)                                                                      |
| PSMA2     | 475870    | 0,82             | 0,12                         | 0,92        | 0,87        | proteasome (prosome, macropain) subunit, alpha type, 2                                                                     |
| NDRG1     | 482049    | 1,03             | -0,02                        | 0,92        | 0,35        | N-myc downstream regulated 1                                                                                               |
| PDLIM5    | 478482    | 0,84             | -0,03                        | 0,92        | 0,27        | PDZ and LIM domain 5                                                                                                       |
| KRT18     | 477601    | 1,29             | 1,06                         | 0,92        | 1,06        | keratin 18                                                                                                                 |
| PLEC      | 482083    | 1,17             | 0,68                         | 0,92        | 0,79        | plectin                                                                                                                    |
| RNMT      | 476200    | 0,77             | 0,22                         | 0,92        | 0,75        | RNA (guanine-7-) methyltransferase                                                                                         |
| PGD       | 478236    | 0,77             | -0,07                        | 0,92        | 0,59        | phosphogluconate dehydrogenase                                                                                             |
| KPNB1     | 491042    | 0,88             | 0,25                         | 0,93        | 0,82        | karyopherin (importin) beta 1                                                                                              |
| HMGA1     | 442946    | 0,77             | 0,33                         | 0,93        | 0,38        | high mobility group AT-hook 1                                                                                              |
| TSNAX     | 479203    | 0,60             | -0,19                        | 0,93        | 0,56        | translin-associated factor X                                                                                               |
| PPP1CA    | 403609    | 0,92             | 0,48                         | 0,93        | 0,81        | protein phosphatase 1, catalytic subunit, alpha isozyme                                                                    |
| SF3B2     | 476015    | 0,72             | 0,18                         | 0,94        | 0,60        | splicing factor 3b, subunit 2, 145kDa                                                                                      |
| G6PD      | 481088    | 0,71             | -0,18                        | 0,94        | 0,47        | glucose-6-phosphate dehydrogenase                                                                                          |
| GART      | 487740    | 0,82             | 0,05                         | 0,94        | 0,66        | phosphoribosylglycinamide formyltransferase, phosphoribosylglycinamide synthetase, phosphoribosylaminoimidazole synthetase |
| PPA1      | 479238    | 0,80             | -0,28                        | 0,94        | 0,72        | pyrophosphatase (inorganic) 1                                                                                              |
| LOC474798 | 474798    | 0,95             | 3.8133256<br>2604872e-<br>05 | 0,95        | 0,26        | similar to Thioredoxin (ATL-derived factor) (ADF) (Surface associated sulphhydryl protein) (SASP)                          |
| THRAP3    | 482476    | 0,95             | 0,43                         | 0,95        | 0,86        | thyroid hormone receptor associated protein 3                                                                              |
| ACOT7     | 479589    | 0,84             | -0,30                        | 0,95        | 0,36        | acyl-CoA thioesterase 7                                                                                                    |
| LOC475852 | 475852    | 1,10             | 0,01                         | 0,95        | 0,56        | similar to Calcizzarin (S100 calcium-binding protein A11) (S100C protein) (MLN 70)                                         |
| NQO1      | 610935    | 0,90             | -0,27                        | 0,95        | 0,43        | NAD(P)H dehydrogenase, quinone 1                                                                                           |
| USP5      | 486718    | 0,68             | -0,40                        | 0,95        | 0,56        | ubiquitin specific peptidase 5 (isopeptidase T)                                                                            |
| CPNE1     | 477213    | 0,80             | -0,21                        | 0,96        | 0,57        | copine I                                                                                                                   |
| ALDH1A1   | 476323    | 1,16             | 0,11                         | 0,96        | 0,84        | aldehyde dehydrogenase 1 family, member A1                                                                                 |
| SF3A3     | 475326    | 0,93             | 0,27                         | 0,96        | 0,85        | splicing factor 3a, subunit 3, 60kDa                                                                                       |
| TALDO1    | 475937    | 1,20             | 0,08                         | 0,96        | 0,83        | transaldolase 1                                                                                                            |
| LOC476570 | 476570    | 1,01             | 0,45                         | 0,96        | 0,93        | similar to Elongation factor 1-gamma (EF-1-gamma)                                                                          |

| Symbol           | Entrez Id | log2 fold change |            |             |             | Name                                                                                                                   |
|------------------|-----------|------------------|------------|-------------|-------------|------------------------------------------------------------------------------------------------------------------------|
|                  |           | 4hrs p.i.        | 8 hrs p.i. | 10 hrs p.i. | 12 hrs p.i. |                                                                                                                        |
|                  |           |                  |            |             |             | (eEF-1B gamma)                                                                                                         |
| <b>TCEB1</b>     | 477914    | 0,73             | 0,09       | 0,96        | 0,89        | transcription elongation factor B (SIII), polypeptide 1 (15kDa, elongin C)                                             |
| <b>CA2</b>       | 477928    | 0,83             | 0,12       | 0,96        | 0,76        | carbonic anhydrase II                                                                                                  |
| <b>UMPS</b>      | 478593    | 0,95             | 0,07       | 0,96        | 0,85        | uridine monophosphate synthetase                                                                                       |
| <b>USP10</b>     | 479625    | 0,95             | 0,32       | 0,96        | 0,79        | ubiquitin specific peptidase 10                                                                                        |
| <b>GMPS</b>      | 477123    | 0,70             | 0,00       | 0,97        | 0,73        | guanine monphosphate synthetase                                                                                        |
| <b>TCEB2</b>     | 479873    | 1,15             | 0,29       | 0,97        | 0,81        | transcription elongation factor B (SIII), polypeptide 2 (18kDa, elongin B)                                             |
| <b>IMPDH2</b>    | 476630    | 0,88             | 0,58       | 0,97        | 1,04        | IMP (inosine 5'-monophosphate) dehydrogenase 2                                                                         |
| <b>SEC31A</b>    | 478453    | 0,51             | -0,18      | 0,97        | 0,72        | SEC31 homolog A (S. cerevisiae)                                                                                        |
| <b>PSMD13</b>    | 475934    | 0,83             | 0,23       | 0,97        | 0,85        | proteasome (prosome, macropain) 26S subunit, non-ATPase, 13                                                            |
| <b>SKP1</b>      | 474682    | 0,90             | 0,32       | 0,97        | 0,62        | S-phase kinase-associated protein 1                                                                                    |
| <b>CAB39</b>     | 477403    | 1,04             | -0,02      | 0,98        | 0,64        | calcium binding protein 39                                                                                             |
| <b>CD2AP</b>     | 474928    | 0,67             | -0,32      | 0,98        | 0,47        | CD2-associated protein                                                                                                 |
| <b>RBM25</b>     | 610314    | 0,22             | -0,22      | 0,98        | 0,39        | RNA binding motif protein 25                                                                                           |
| <b>SEPHS1</b>    | 477999    | 0,91             | 0,24       | 0,98        | 0,84        | selenophosphate synthetase 1                                                                                           |
| <b>AK2</b>       | 478145    | 0,58             | 0,07       | 0,99        | 0,76        | adenylate kinase 2                                                                                                     |
| <b>CFL1</b>      | 476022    | 1,02             | -0,20      | 0,99        | 0,40        | cofilin 1 (non-muscle)                                                                                                 |
| <b>PSMB4</b>     | 475848    | 0,83             | 0,18       | 0,99        | 1,07        | proteasome (prosome, macropain) subunit, beta type, 4                                                                  |
| <b>LOC483608</b> | 483608    | 1,07             | 0,33       | 0,99        | 0,90        | similar to heat shock 70kD protein binding protein                                                                     |
| <b>PGK1</b>      | 480964    | 1,02             | 0,10       | 1,00        | 0,71        | phosphoglycerate kinase 1                                                                                              |
| <b>PSMD7</b>     | 479671    | 0,82             | 0,06       | 1,00        | 0,80        | proteasome (prosome, macropain) 26S subunit, non-ATPase, 7                                                             |
| <b>ME1</b>       | 403709    | 0,61             | -0,07      | 1,01        | 0,60        | malic enzyme 1, NADP(+)-dependent, cytosolic                                                                           |
| <b>ANXA5</b>     | 476094    | 1,16             | -0,25      | 1,01        | 0,54        | annexin A5                                                                                                             |
| <b>COPS3</b>     | 479528    | 0,88             | 0,03       | 1,01        | 0,78        | COP9 constitutive photomorphogenic homolog subunit 3 (Arabidopsis)                                                     |
| <b>PPID</b>      | 475481    | 1,01             | -0,09      | 1,01        | 0,67        | peptidylprolyl isomerase D                                                                                             |
| <b>PRDX6</b>     | 480069    | 0,99             | -0,24      | 1,01        | 0,51        | peroxiredoxin 6                                                                                                        |
| <b>LUC7L2</b>    | 475529    | 1,12             | 0,43       | 1,01        | 0,90        | LUC7-like 2 (S. cerevisiae)                                                                                            |
| <b>FKBP4</b>     | 477726    | 0,93             | 0,04       | 1,02        | 0,84        | FK506 binding protein 4, 59kDa                                                                                         |
| <b>MAP2K1</b>    | 478347    | 0,79             | 0,13       | 1,02        | 0,61        | mitogen-activated protein kinase kinase 1                                                                              |
| <b>UBA1</b>      | 480896    | 1,10             | 0,07       | 1,02        | 0,85        | ubiquitin-like modifier activating enzyme 1                                                                            |
| <b>EEF1D</b>     | 475115    | 1,17             | 0,57       | 1,02        | 1,00        | eukaryotic translation elongation factor 1 delta (guanine nucleotide exchange protein)                                 |
| <b>CPSF6</b>     | 474441    | 0,77             | 0,46       | 1,02        | 0,81        | cleavage and polyadenylation specific factor 6, 68kDa                                                                  |
| <b>LOC474987</b> | 474987    | 1,02             | 0,33       | 1,02        | 1,13        | similar to Proteasome subunit beta type 3 (Proteasome theta chain) (Proteasome chain 13) (Proteasome component C10-II) |
| <b>FABP3</b>     | 478156    | 0,73             | -0,74      | 1,02        | -0,07       | fatty acid binding protein 3, muscle and heart                                                                         |

| Symbol    | Entrez Id | log2 fold change |            |             |             | Name                                                                                                                                   |
|-----------|-----------|------------------|------------|-------------|-------------|----------------------------------------------------------------------------------------------------------------------------------------|
|           |           | 4hrs p.i.        | 8 hrs p.i. | 10 hrs p.i. | 12 hrs p.i. |                                                                                                                                        |
| SEC23A    | 480295    | 0,66             | 0,24       | 1,02        | 0,44        | (mammary-derived growth inhibitor)<br>Sec23 homolog A (S. cerevisiae)                                                                  |
| ENO1      | 479597    | 1,06             | 0,08       | 1,02        | 0,73        | enolase 1, (alpha)                                                                                                                     |
| ATP6V1G2  | 474840    | 1,08             | 0,46       | 1,02        | 1,03        | ATPase, H+ transporting, lysosomal 13kDa, V1 subunit G2                                                                                |
| ATP6V1A   | 487981    | 0,89             | 0,17       | 1,03        | 0,83        | ATPase, H+ transporting, lysosomal 70kDa, V1 subunit A                                                                                 |
| PSMD3     | 491018    | 0,76             | 0,02       | 1,03        | 0,71        | proteasome (prosome, macropain) 26S subunit, non-ATPase, 3                                                                             |
| ACAT2     | 484063    | 0,98             | -0,19      | 1,03        | 0,54        | acetyl-CoA acetyltransferase 2                                                                                                         |
| YWHAE     | 480645    | 1,08             | 0,40       | 1,04        | 0,87        | tyrosine 3-monooxygenase/tryptophan 5-monooxygenase activation protein, epsilon polypeptide similar to suppressor of G2 allele of SKP1 |
| LOC477951 | 477951    | 0,91             | -0,04      | 1,04        | 0,66        | similar to suppressor of G2 allele of SKP1                                                                                             |
| SPTBN1    | 403743    | 1,05             | 0,55       | 1,04        | 0,95        | spectrin, beta, non-erythrocytic 1                                                                                                     |
| LOC478521 | 478521    | 1,23             | 0,46       | 1,04        | 0,96        | similar to 14-3-3 protein theta (14-3-3 protein tau)                                                                                   |
| ANXA11    | 479259    | 1,09             | 0,01       | 1,04        | 0,67        | annexin A11                                                                                                                            |
| PSMB2     | 475338    | 0,99             | 0,21       | 1,05        | 1,03        | proteasome (prosome, macropain) subunit, beta type, 2                                                                                  |
| DCXR      | 475926    | 0,88             | -0,02      | 1,05        | 0,62        | dicarbonyl/L-xylulose reductase                                                                                                        |
| GDI2      | 403818    | 1,00             | 0,08       | 1,05        | 0,74        | GDP dissociation inhibitor 2                                                                                                           |
| PSMA3     | 480338    | 1,03             | 0,32       | 1,05        | 1,03        | proteasome (prosome, macropain) subunit, alpha type, 3                                                                                 |
| RNH1      | 483402    | 0,93             | -0,13      | 1,05        | 0,68        | ribonuclease/angiogenin inhibitor 1                                                                                                    |
| SRRM2     | 609638    | 0,70             | 0,02       | 1,06        | 0,81        | serine/arginine repetitive matrix 2                                                                                                    |
| EIF4B     | 477600    | 1,23             | 0,77       | 1,06        | 1,06        | eukaryotic translation initiation factor 4B                                                                                            |
| CTTN      | 610283    | 1,10             | 0,33       | 1,06        | 0,86        | cortactin                                                                                                                              |
| PSMB1     | 475040    | 0,97             | 0,18       | 1,06        | 1,08        | proteasome (prosome, macropain) subunit, beta type, 1                                                                                  |
| AK1       | 480712    | 0,69             | -0,46      | 1,06        | 0,24        | adenylate kinase 1                                                                                                                     |
| ESD       | 607116    | 0,52             | -0,60      | 1,06        | 0,42        | esterase D                                                                                                                             |
| HSP90AB1  | 474919    | 0,98             | 0,21       | 1,07        | 0,92        | heat shock protein 90kDa alpha (cytosolic), class B member 1                                                                           |
| TXNL1     | 483970    | 0,96             | -0,15      | 1,07        | 0,65        | thioredoxin-like 1                                                                                                                     |
| ATOX1     | 403713    | 1,13             | -0,30      | 1,07        | 0,02        | ATX1 antioxidant protein 1 homolog (yeast)                                                                                             |
| SRI       | 475220    | 1,27             | 0,08       | 1,07        | 0,87        | sorcin                                                                                                                                 |
| PKM2      | 403874    | 1,08             | 0,26       | 1,07        | 1,01        | pyruvate kinase, muscle                                                                                                                |
| TIMM8A    | 480986    | 1,01             | 0,85       | 1,07        | 1,07        | translocase of inner mitochondrial membrane 8 homolog A (yeast)                                                                        |
| EEF2      | 476744    | 1,15             | 0,31       | 1,08        | 0,84        | eukaryotic translation elongation factor 2                                                                                             |
| CDK6      | 609920    | 0,74             | -0,15      | 1,08        | 0,01        | cyclin-dependent kinase 6                                                                                                              |
| NME1      | 476767    | 0,99             | 0,12       | 1,08        | 0,69        | non-metastatic cells 1, protein (NM23A) expressed in                                                                                   |
| STIP1     | 474837    | 1,09             | 0,32       | 1,08        | 1,03        | stress-induced-phosphoprotein 1                                                                                                        |
| TTL12     | 474474    | 0,90             | -0,01      | 1,08        | 0,78        | tubulin tyrosine ligase-like family, member 12                                                                                         |
| CRYAB     | 479441    | 0,85             | 0,19       | 1,08        | 0,91        | crystallin, alpha B                                                                                                                    |

| Symbol    | Entrez Id | log2 fold change |            |             |             | Name                                                                                       |
|-----------|-----------|------------------|------------|-------------|-------------|--------------------------------------------------------------------------------------------|
|           |           | 4hrs p.i.        | 8 hrs p.i. | 10 hrs p.i. | 12 hrs p.i. |                                                                                            |
| LOC486122 | 486122    | 0,67             | 0,19       | 1,09        | 0,62        | similar to p30 DBC protein                                                                 |
| YWHAB     | 477237    | 1,09             | 0,44       | 1,09        | 0,99        | tyrosine 3-monooxygenase/tryptophan 5-monooxygenase activation protein, beta polypeptide   |
| LOC480151 | 480151    | 0,87             | 0,27       | 1,09        | 0,89        | similar to CG14299-PA, isoform A                                                           |
| RAN       | 442976    | 1,04             | 0,14       | 1,09        | 0,89        | RAN, member RAS oncogene family                                                            |
| BCAT1     | 486633    | 1,03             | -0,03      | 1,10        | 0,71        | branched chain amino-acid transaminase 1, cytosolic                                        |
| ATP6V1E1  | 477740    | 0,75             | -0,06      | 1,11        | 0,77        | ATPase, H+ transporting, lysosomal 31kDa, V1 subunit E1                                    |
| LOC607013 | 607013    | 1,00             | 0,29       | 1,11        | 1,04        | similar to Coatomer zeta-1 subunit (Zeta-1 coat protein) (Zeta-1 COP)                      |
| CAPG      | 483082    | 1,29             | 0,00       | 1,11        | 0,71        | capping protein (actin filament), gelsolin-like                                            |
| IPO9      | 480004    | 0,97             | 0,08       | 1,12        | 0,93        | importin 9                                                                                 |
| LASP1     | 608624    | 1,15             | 0,09       | 1,12        | 0,76        | LIM and SH3 protein 1                                                                      |
| ANXA8     | 479270    | 1,11             | -0,10      | 1,13        | 0,57        | annexin A8                                                                                 |
| VCP       | 481590    | 0,86             | 0,34       | 1,13        | 0,99        | valosin containing protein                                                                 |
| EIF3G     | 612971    | 1,15             | 0,44       | 1,13        | 0,95        | eukaryotic translation initiation factor 3, subunit G                                      |
| GSPT2     | 480921    | 0,71             | -0,07      | 1,13        | 0,84        | G1 to S phase transition 2                                                                 |
| TBCA      | 479173    | 0,80             | -0,46      | 1,13        | 0,44        | tubulin folding cofactor A                                                                 |
| DGKA      | 474393    | 0,98             | -0,03      | 1,13        | 0,93        | diacylglycerol kinase, alpha 80kDa                                                         |
| S100A4    | 403787    | 1,05             | -0,79      | 1,13        | 0,09        | S100 calcium binding protein A4                                                            |
| PGLS      | 610090    | 0,67             | -0,47      | 1,13        | 0,20        | 6-phosphogluconolactonase                                                                  |
| UBQLN1    | 476312    | 0,99             | 0,04       | 1,14        | 0,88        | ubiquilin 1                                                                                |
| PPP2CA    | 403608    | 1,02             | 0,39       | 1,14        | 0,89        | protein phosphatase 2, catalytic subunit, alpha isozyme                                    |
| PEBP1     | 477501    | 0,96             | -0,22      | 1,14        | 0,37        | phosphatidylethanolamine binding protein 1                                                 |
| PNP       | 475393    | 1,33             | 0,15       | 1,14        | 0,88        | purine nucleoside phosphorylase                                                            |
| GDI1      | 403819    | 1,09             | -0,03      | 1,14        | 0,78        | GDP dissociation inhibitor 1                                                               |
| ISG15     | 479575    | 1,32             | 0,10       | 1,14        | 1,53        | ISG15 ubiquitin-like modifier                                                              |
| LOC476784 | 476784    | 1,00             | 0,07       | 1,15        | 0,62        | similar to ubiquitin-conjugating enzyme E2N                                                |
| ANXA1     | 476322    | 1,34             | 0,10       | 1,15        | 0,73        | annexin A1                                                                                 |
| EIF4H     | 607749    | 1,28             | 0,56       | 1,15        | 0,98        | eukaryotic translation initiation factor 4H                                                |
| PRDX2     | 484926    | 1,11             | 0,33       | 1,16        | 0,97        | peroxiredoxin 2                                                                            |
| HMGCS1    | 479344    | 1,15             | 0,51       | 1,16        | 0,68        | 3-hydroxy-3-methylglutaryl-CoA synthase 1 (soluble)                                        |
| CORO1B    | 476007    | 1,13             | 0,32       | 1,16        | 0,88        | coronin, actin binding protein, 1B                                                         |
| VASP      | 403936    | 1,13             | 0,08       | 1,16        | 0,89        | vasodilator-stimulated phosphoprotein                                                      |
| PRKAR1A   | 480459    | 1,01             | 0,07       | 1,16        | 0,81        | protein kinase, cAMP-dependent, regulatory, type I, alpha (tissue specific extinguisher 1) |
| BPNT1     | 608525    | 0,97             | 0,03       | 1,17        | 0,72        | 3'(2'), 5'-bisphosphate nucleotidase 1                                                     |
| USP14     | 480182    | 0,99             | 0,24       | 1,17        | 0,86        | ubiquitin specific peptidase 14 (tRNA-guanine transglycosylase)                            |
| TPT1      | 476924    | 1,34             | 0,31       | 1,17        | 0,91        | tumor protein, translationally-controlled 1                                                |
| EIF4A1    | 479485    | 1,23             | 0,60       | 1,18        | 0,98        | eukaryotic translation initiation factor 4A1                                               |
| PDCD5     | 476499    | 0,89             | -0,24      | 1,18        | 0,90        | programmed cell death 5                                                                    |
| CSTB      | 478424    | 1,33             | 0,01       | 1,19        | 0,61        | cystatin B (stefin B)                                                                      |



| Symbol    | Entrez Id | log2 fold change |            |             |             | Name                                                                                             |
|-----------|-----------|------------------|------------|-------------|-------------|--------------------------------------------------------------------------------------------------|
|           |           | 4hrs p.i.        | 8 hrs p.i. | 10 hrs p.i. | 12 hrs p.i. |                                                                                                  |
| TKT       | 476588    | 1,22             | 0,30       | 1,20        | 1,02        | transketolase                                                                                    |
| UBXN1     | 476055    | 0,91             | -0,12      | 1,21        | 0,84        | UBX domain protein 1                                                                             |
| AHSA1     | 480402    | 0,67             | -0,02      | 1,22        | 0,98        | AHA1, activator of heat shock 90kDa protein ATPase homolog 1 (yeast)                             |
| SF1       | 476031    | 0,74             | 0,50       | 1,22        | 0,85        | splicing factor 1                                                                                |
| ALDOC     | 480622    | 0,75             | -0,11      | 1,22        | 0,82        | aldolase C, fructose-bisphosphate                                                                |
| YWHAZ     | 475864    | 1,27             | 0,50       | 1,23        | 1,03        | tyrosine 3-monooxygenase/tryptophan 5-monooxygenase activation protein, zeta polypeptide         |
| HINT1     | 474667    | 1,17             | 0,07       | 1,23        | 0,83        | histidine triad nucleotide binding protein 1                                                     |
| PGAM1     | 477786    | 1,04             | -0,04      | 1,24        | 0,71        | phosphoglycerate mutase 1 (brain)                                                                |
| GSTO1     | 477813    | 1,29             | -0,08      | 1,24        | 0,75        | glutathione S-transferase omega 1                                                                |
| DBNL      | 607412    | 0,87             | 0,15       | 1,24        | 0,88        | drebrin-like                                                                                     |
| PREP      | 481945    | 0,89             | -0,18      | 1,25        | 0,78        | prolyl endopeptidase                                                                             |
| TFG       | 487954    | 1,05             | -0,13      | 1,25        | 1,13        | TRK-fused gene                                                                                   |
| LOC475191 | 475191    | 1,20             | -0,07      | 1,26        | 0,74        | similar to Glutathione S-transferase P (GST 7-7) (Chain 7) (GST class-pi)                        |
| EML2      | 476434    | 0,65             | -0,31      | 1,28        | 0,40        | echinoderm microtubule associated protein like 2                                                 |
| NOLC1     | 609496    | 1,04             | 0,32       | 1,29        | 1,05        | nucleolar and coiled-body phosphoprotein 1                                                       |
| TAGLN2    | 610210    | 1,37             | 0,20       | 1,29        | 0,93        | transgelin 2                                                                                     |
| TPM1      | 478332    | 1,53             | 0,65       | 1,33        | 1,33        | tropomyosin 1 (alpha)                                                                            |
| STMN1     | 478175    | 1,46             | -0,10      | 1,34        | 0,87        | stathmin 1                                                                                       |
| ARHGDI    | 475924    | 1,21             | 0,23       | 1,35        | 0,84        | Rho GDP dissociation inhibitor (GDI) alpha                                                       |
| SERPINB9  | 488192    | 1,36             | 0,35       | 1,37        | 1,56        | serpin peptidase inhibitor, clade B (ovalbumin), member 9                                        |
| LOC476719 | 476719    | 1,21             | 0,25       | 1,38        | 1,09        | similar to Fructose-bisphosphate aldolase A (Muscle-type aldolase) (Lung cancer antigen NY-LU-1) |
| SFN       | 487351    | 1,42             | 0,43       | 1,39        | 1,07        | stratifin                                                                                        |
| NDUFA8    | 480741    | -0,76            | -0,64      | 1,39        | -0,64       | NADH dehydrogenase (ubiquinone) 1 alpha subcomplex, 8, 19kDa                                     |
| DBI       | 476115    | 1,61             | 0,17       | 1,43        | 0,76        | diazepam binding inhibitor (GABA receptor modulator, acyl-CoA binding protein)                   |
| HNRNPK    | 480979    | 1,53             | 0,98       | 1,45        | 1,56        | heterogeneous nuclear ribonucleoprotein K                                                        |
| PPIA      | 403581    | 1,70             | 0,63       | 1,45        | 1,10        | peptidylprolyl isomerase A (cyclophilin A)                                                       |
| GLTP      | 612989    | 1,41             | 0,52       | 1,46        | 0,75        | glycolipid transfer protein                                                                      |
| SRRM1     | 478185    | 1,40             | 0,40       | 1,46        | 1,15        | serine/arginine repetitive matrix 1                                                              |
| LOC613005 | 613005    | 1,60             | 0,59       | 1,48        | 1,00        | similar to thymosin, beta 10                                                                     |
| TPM4      | 609879    | 1,60             | 0,44       | 1,48        | 1,33        | tropomyosin 4                                                                                    |
| SF3A2     | 612188    | 0,98             | 0,41       | 1,50        | 1,14        | splicing factor 3a, subunit 2, 66kDa                                                             |
| AHCY      | 477198    | 1,08             | -0,02      | 1,51        | 1,12        | adenosylhomocysteinase                                                                           |
| LGALS3    | 404021    | 1,71             | 0,74       | 1,52        | 1,00        | lectin, galactoside-binding, soluble, 3                                                          |
| PAFAH1B2  | 479425    | 1,41             | 0,23       | 1,54        | 1,06        | platelet-activating factor acetylhydrolase 1b, catalytic subunit 2 (30kDa)                       |
| APRT      | 479615    | 1,24             | -0,25      | 1,56        | 0,84        | adenine phosphoribosyltransferase                                                                |
| ANP32A    | 403534    | 1,67             | 0,74       | 1,68        | 1,68        | acidic (leucine-rich) nuclear phosphoprotein 32 family, member A                                 |
| PKP3      | 483399    | 0,27             | -0,01      | -           | -0,27       | plakophilin 3                                                                                    |

| Symbol | Entrez Id | log2 fold change |            |             |             | Name |
|--------|-----------|------------------|------------|-------------|-------------|------|
|        |           | 4hrs p.i.        | 8 hrs p.i. | 10 hrs p.i. | 12 hrs p.i. |      |
|        |           |                  |            | 3.486461914 |             |      |
|        |           |                  |            | 79722e-05   |             |      |
