# Supplementary material for: Alteration of Protein Levels during Influenza Virus H1N1 Infection in Host Cells: A Proteomic Survey of Host and Virus Reveals Differential Dynamics
Source: PubMed Central journal article supplement (PMC3981805; doi:10.1371/journal.pone.0094257), 2014-04-09
Supplement: pone.0094257.s006.pdf [file pone.0094257.s006.pdf]

**Table S2: Z-scores for all significant GO terms in the four quartiles.**

| GO Biological Process                                              | Enrichment z-score |              |              |              |
|--------------------------------------------------------------------|--------------------|--------------|--------------|--------------|
|                                                                    | 0-10%              | 10-50%       | 50-90%       | 90-100%      |
| regulation of cellular macromolecule biosynthetic process          | -0,565553225       | 1,496656278  | -0,407702215 | -0,523400839 |
| hormone transport                                                  | -0,55977901        | 1,49685698   | -0,409339831 | -0,52773814  |
| negative regulation of biosynthetic process                        | -0,545871096       | 1,497142015  | -0,411868877 | -0,539402042 |
| cellular amino acid metabolic process                              | -0,573720597       | 1,494487541  | -0,378390231 | -0,542376713 |
| RNA biosynthetic process                                           | -0,55529168        | 1,495098674  | -0,384134882 | -0,555672112 |
| regulation of cellular biosynthetic process                        | -0,610582956       | 1,492355211  | -0,365708927 | -0,516063328 |
| intracellular signal transduction                                  | -0,610582956       | 1,492355211  | -0,365708927 | -0,516063328 |
| regulation of protein metabolic process                            | -0,541398419       | 1,49792594   | -0,4251922   | -0,53133532  |
| anatomical structure formation involved in morphogenesis           | -0,535692048       | 1,49805306   | -0,427320967 | -0,535040046 |
| peptide transport                                                  | -0,541580026       | 1,498182305  | -0,430358999 | -0,52624328  |
| cellular component assembly                                        | -0,531606474       | 1,49845503   | -0,435314947 | -0,531533609 |
| response to inorganic substance                                    | -0,517920332       | 1,49847298   | -0,437382508 | -0,543170141 |
| signaling                                                          | -0,539338218       | 1,498925011  | -0,448691224 | -0,51089557  |
| organ morphogenesis                                                | -0,516123195       | 1,499617994  | -0,467959702 | -0,515535097 |
| cellular macromolecule metabolic process                           | -0,520553924       | 1,499361288  | -0,458521532 | -0,520285832 |
| nucleic acid metabolic process                                     | -0,518307384       | 1,499488102  | -0,462885794 | -0,518294925 |
| purine ribonucleoside triphosphate biosynthetic process            | -0,507145788       | 1,499831969  | -0,479105229 | -0,513580952 |
| regulation of biosynthetic process                                 | -0,420667236       | 1,497678336  | -0,535171994 | -0,541839105 |
| divalent inorganic cation homeostasis                              | -0,394853496       | 1,495951619  | -0,552886855 | -0,548211269 |
| regulation of localization                                         | -0,470734472       | 1,499624573  | -0,503773184 | -0,525116917 |
| regulation of catalytic activity                                   | -0,391542975       | 1,484802403  | -0,695706596 | -0,397552833 |
| defense response                                                   | -0,372862523       | 1,492063461  | -0,62446493  | -0,494736008 |
| small molecule biosynthetic process                                | -0,424063255       | 1,492524195  | -0,638483753 | -0,429977186 |
| regulation of signal transduction                                  | -0,424063255       | 1,492524195  | -0,638483753 | -0,429977186 |
| cell communication                                                 | -0,454112617       | 1,497134593  | -0,586404435 | -0,456617541 |
| negative regulation of cellular macromolecule biosynthetic process | -0,532588205       | 1,492897716  | -0,59528302  | -0,365026492 |
| regulation of gene expression                                      | -0,547443582       | 1,495436852  | -0,5595201   | -0,388473171 |
| growth                                                             | -0,539697859       | 1,497052936  | -0,546847747 | -0,410507331 |
| regulation of cellular component organization                      | -0,696113378       | 1,472491227  | -0,539540287 | -0,236837562 |
| genitalia development                                              | -0,65402046        | 1,469401806  | -0,608554061 | -0,206827285 |
| tissue morphogenesis                                               | -0,65402046        | 1,469401806  | -0,608554061 | -0,206827285 |
| response to corticosteroid stimulus                                | -0,627925382       | 1,477979039  | -0,598220454 | -0,251833203 |
| reproductive process                                               | -0,621641004       | 1,480570529  | -0,591627345 | -0,26730218  |
| mitotic cell cycle                                                 | -0,719938008       | 1,426247169  | -0,667854406 | -0,038454755 |
| cell cycle process                                                 | -0,728749989       | 1,432637791  | -0,642411966 | -0,061475836 |
| nucleobase-containing biosynthetic process                         | -0,650662866       | 1,445001392  | -0,691381741 | -0,102956786 |
| nucleoside phosphate metabolic process                             | -0,650662866       | 1,445001392  | -0,691381741 | -0,102956786 |
| positive regulation of cellular component organization             | -0,273333455       | 1,477493757  | -0,695085537 | -0,509074765 |
| signal release                                                     | -0,223841165       | 1,466895022  | -0,734493036 | -0,508560821 |
| protein transport                                                  | -0,285096615       | 1,482929266  | -0,632376611 | -0,56545604  |
| ribonucleotide biosynthetic process                                | 0,004021439        | 1,408293814  | -0,804583168 | -0,607732084 |
| morphogenesis of an epithelium                                     | -0,22755114        | 1,458939395  | -0,440254958 | -0,791133297 |
| negative regulation of cellular process                            | -0,762558278       | 1,377477285  | -0,714889565 | 0,099970559  |
| response to steroid hormone stimulus                               | -0,815084588       | 1,292818259  | -0,763339587 | 0,285605916  |
| regulation of programmed cell death                                | -0,791081188       | 1,328626119  | 0,213133082  | -0,750678013 |
| ribonucleoside triphosphate metabolic process                      | -0,650833348       | 1,405217243  | 0,021074875  | -0,77545877  |
| positive regulation of molecular function                          | -0,596388293       | 1,474700946  | -0,234386254 | -0,643926399 |
| protein localization                                               | -0,668154212       | 1,449683599  | -0,120031132 | -0,661498254 |
| protein localization to organelle                                  | -0,582224957       | 1,44524438   | -0,115375626 | -0,747643797 |
| hydrogen transport                                                 | -0,489499587       | -0,481249084 | -0,528926651 | 1,499675322  |
| sterol biosynthetic process                                        | -0,499354743       | -0,500322549 | -0,500322553 | 1,499999844  |

| GO Biological Process                                          | Enrichment z-score |              |              |             |
|----------------------------------------------------------------|--------------------|--------------|--------------|-------------|
|                                                                | 0-10%              | 10-50%       | 50-90%       | 90-100%     |
| regulation of phosphorus metabolic process                     | -0,467672048       | -0,515969327 | -0,515969799 | 1,499611175 |
| intracellular protein kinase cascade                           | -0,512074995       | -0,468020525 | -0,51951709  | 1,49961261  |
| regulation of organelle organization                           | -0,521148079       | -0,445666587 | -0,532077938 | 1,498892605 |
| oxidation-reduction process                                    | -0,493123274       | -0,443687727 | -0,561439928 | 1,498250929 |
| striated muscle contraction                                    | -0,485497929       | -0,4519187   | -0,56102133  | 1,498437959 |
| cellular macromolecule catabolic process                       | -0,554155606       | -0,361311883 | -0,577477568 | 1,492945058 |
| response to metal ion                                          | -0,543323032       | -0,383358038 | -0,568276592 | 1,494957662 |
| regulation of nucleobase-containing compound metabolic process | -0,475268852       | -0,41538986  | -0,604655005 | 1,495313716 |
| cytoskeleton organization                                      | -0,492943233       | -0,548405023 | -0,4576039   | 1,498952157 |
| cellular component organization                                | -0,463626391       | -0,568584922 | -0,465992012 | 1,498203324 |
| muscle system process                                          | -0,503051377       | -0,569199634 | -0,425147082 | 1,497398093 |
| protein heterooligomerization                                  | -0,540649583       | -0,519251555 | -0,438651681 | 1,49855282  |
| taxis                                                          | -0,522322596       | -0,530189495 | -0,446417423 | 1,498929514 |
| muscle contraction                                             | -0,559213839       | -0,526187146 | -0,411594881 | 1,496995866 |
| positive regulation of apoptosis                               | -0,548670006       | -0,550128368 | -0,397342877 | 1,496141251 |
| cellular amine metabolic process                               | -0,553009644       | -0,553324166 | -0,389177366 | 1,495511176 |
| cell differentiation                                           | -0,559964398       | -0,449936183 | -0,488540453 | 1,498441033 |
| response to glucocorticoid stimulus                            | -0,562132246       | -0,454080965 | -0,482214849 | 1,498428061 |
| protein polymerization                                         | -0,587509465       | -0,434638514 | -0,474707108 | 1,496855087 |
| neuron projection morphogenesis                                | -0,605831902       | -0,482928921 | -0,406158199 | 1,494919022 |
| positive regulation of catalytic activity                      | -0,572722399       | -0,494329883 | -0,430405063 | 1,497457346 |
| small molecule metabolic process                               | -0,479599403       | -0,685904186 | -0,317337244 | 1,482840833 |
| proteolysis involved in cellular protein catabolic process     | -0,446357021       | -0,651265247 | -0,393057134 | 1,490679401 |
| striated muscle cell differentiation                           | -0,417370459       | -0,54248466  | -0,537631129 | 1,497486248 |
| establishment of protein localization                          | -0,409221286       | -0,551422598 | -0,536303043 | 1,496946927 |
| organic acid transport                                         | -0,310545084       | -0,593758032 | -0,582771407 | 1,487074523 |
| nematode larval development                                    | -0,373658159       | -0,557480729 | -0,563042485 | 1,494181373 |
| cellular divalent inorganic cation homeostasis                 | -0,360848426       | -0,574156484 | -0,557928101 | 1,492933012 |
| response to stress                                             | -0,351801102       | -0,599640945 | -0,54016424  | 1,491606287 |
| purine-containing compound metabolic process                   | -0,362932639       | -0,662423042 | -0,462975396 | 1,488331077 |
| gene expression                                                | -0,32284372        | -0,666087631 | -0,49626804  | 1,485199391 |
| epithelium development                                         | -0,619793718       | -0,609994945 | -0,247535909 | 1,477324571 |
| RNA metabolic process                                          | -0,614667243       | -0,625971341 | -0,234301096 | 1,474939679 |
| proteolysis                                                    | -0,614667243       | -0,625971341 | -0,234301096 | 1,474939679 |
| leukocyte activation                                           | -0,614667243       | -0,625971341 | -0,234301096 | 1,474939679 |
| negative regulation of protein metabolic process               | -0,614667243       | -0,625971341 | -0,234301096 | 1,474939679 |
| pyridine-containing compound metabolic process                 | -0,614667243       | -0,625971341 | -0,234301096 | 1,474939679 |
| regulation of hydrolase activity                               | -0,632454602       | -0,633395487 | -0,203024448 | 1,468874537 |
| negative regulation of cellular biosynthetic process           | -0,626257931       | -0,638280814 | -0,204650423 | 1,469189168 |
| positive regulation of programmed cell death                   | -0,677323084       | -0,578397847 | -0,214241619 | 1,46996255  |
| purine ribonucleotide biosynthetic process                     | -0,642562347       | -0,575712677 | -0,260796832 | 1,479071856 |
| hermaphrodite genitalia development                            | -0,627837732       | -0,535225223 | -0,324833798 | 1,487896753 |
| regulation of cell cycle process                               | -0,627837732       | -0,535225223 | -0,324833798 | 1,487896753 |
| regulation of phosphorylation                                  | -0,627837732       | -0,535225223 | -0,324833798 | 1,487896753 |
| nucleobase-containing catabolic process                        | -0,566093724       | -0,603290137 | -0,318593627 | 1,487977489 |
| oxidoreduction coenzyme metabolic process                      | -0,659477664       | -0,662538748 | -0,130278064 | 1,452294476 |
| regulation of cellular catabolic process                       | -0,670855551       | -0,647037137 | -0,135684137 | 1,453576825 |
| calcium ion transport                                          | -0,653161357       | -0,651481337 | -0,153254853 | 1,457897547 |
| organophosphate metabolic process                              | -0,663990457       | -0,405826247 | -0,419598808 | 1,489415513 |
| oogenesis                                                      | -0,741295314       | -0,384014242 | -0,351088491 | 1,476398046 |
| nicotinamide nucleotide metabolic process                      | -0,704276589       | -0,417133275 | -0,361578722 | 1,482988586 |
| positive regulation of macromolecule metabolic process         | -0,820641192       | -0,316558902 | -0,320142455 | 1,457342549 |
| mitochondrial transport                                        | -0,76385153        | -0,442238079 | -0,261139855 | 1,467229464 |

| GO Biological Process                                                   | 0-10%        | Enrichment z-score |              | 90-100%     |
|-------------------------------------------------------------------------|--------------|--------------------|--------------|-------------|
|                                                                         |              | 10-50%             | 50-90%       |             |
| regulation of nitrogen compound metabolic process                       | -0,185038967 | -0,798144282       | -0,468981548 | 1,452164796 |
| regulation of biological quality                                        | -0,270619249 | -0,892318765       | -0,271267773 | 1,434205787 |
| response to wounding                                                    | -0,321112891 | -0,306655443       | -0,827562812 | 1,455331146 |
| cellular calcium ion homeostasis                                        | -0,216267426 | -0,158372124       | -1,008081679 | 1,382721229 |
| actin cytoskeleton organization                                         | -0,044212469 | -0,706193431       | -0,677835888 | 1,428241788 |
| cell-cell signaling                                                     | -0,059635948 | -0,7239537         | -0,648716643 | 1,432306291 |
| lipid biosynthetic process                                              | -0,090912243 | -0,666294831       | -0,68467086  | 1,441877934 |
| learning or memory                                                      | -0,096038788 | -0,666426893       | -0,680834669 | 1,44330035  |
| small molecule catabolic process                                        | -0,095487039 | -0,664003412       | -0,683638248 | 1,443128699 |
| cell death                                                              | -0,135864078 | -0,669553339       | -0,648217233 | 1,453634651 |
| purine-containing compound catabolic process                            | -0,14044872  | -0,619551031       | -0,694158136 | 1,454157887 |
| establishment of protein localization to organelle                      | -0,04566788  | -0,527388186       | -0,843865597 | 1,416921663 |
| cellular macromolecule biosynthetic process                             | -0,265178096 | -0,569631473       | -0,644844493 | 1,479654062 |
| response to drug                                                        | -0,242185657 | -0,578926846       | -0,654590908 | 1,475703411 |
| negative regulation of phosphate metabolic process                      | -0,221760956 | -0,61103914        | -0,639695414 | 1,47249551  |
| cell activation                                                         | -0,217486496 | -0,603207651       | -0,650801057 | 1,471495205 |
| negative regulation of nucleobase-containing compound metabolic process | -0,236261604 | -0,643448148       | -0,595328758 | 1,47503851  |
| ion transport                                                           | -0,238509856 | -0,648556664       | -0,588223445 | 1,475289965 |
| cellular component morphogenesis                                        | -0,230542542 | -0,50265167        | -0,734630518 | 1,46782473  |
| regulation of macromolecule biosynthetic process                        | -0,313324336 | -0,537746667       | -0,635241444 | 1,486312447 |
| translational elongation                                                | -0,272454212 | -0,547456243       | -0,66007603  | 1,479986486 |
| cellular biosynthetic process                                           | -0,280832208 | -0,529130227       | -0,670457042 | 1,480419477 |
| establishment of protein localization in mitochondrion                  | -0,306661181 | -0,482520133       | -0,692085391 | 1,481266705 |
| protein complex biogenesis                                              | -0,306661181 | -0,482520133       | -0,692085391 | 1,481266705 |
| regulation of body fluid levels                                         | -0,354087747 | -0,502763862       | -0,633354075 | 1,490205684 |
| regulation of phosphate metabolic process                               | -0,336740893 | -0,508860332       | -0,64259744  | 1,488198664 |
| myeloid leukocyte activation                                            | -0,336740893 | -0,508860332       | -0,64259744  | 1,488198664 |
| cellular nitrogen compound biosynthetic process                         | -0,853133895 | -0,172057029       | -0,413970973 | 1,439161898 |
| regulation of protein modification process                              | -0,765017247 | -0,165442481       | -0,52332963  | 1,453789358 |
| ATP metabolic process                                                   | -0,629668486 | -0,285102951       | -0,568243482 | 1,483014919 |
| mitochondrion organization                                              | -0,629668486 | -0,285102951       | -0,568243482 | 1,483014919 |
| purine nucleoside triphosphate metabolic process                        | -0,642686908 | -0,190694015       | -0,632911237 | 1,46629216  |
| organ development                                                       | -0,705249749 | -0,013747028       | -0,699736154 | 1,41873293  |
| spindle organization                                                    | -0,845204816 | 0,542355589        | -0,834886799 | 1,137736027 |
| death                                                                   | -0,850192683 | 0,529767611        | -0,825987892 | 1,146412963 |
| response to estrogen stimulus                                           | -0,864323662 | -0,867478729       | 0,886583345  | 0,845219046 |
| male gamete generation                                                  | -0,864228851 | -0,867607117       | 0,885133554  | 0,846702413 |
| positive regulation of cellular protein metabolic process               | -0,844791661 | -0,886756573       | 0,886512827  | 0,845035406 |
| metal ion transport                                                     | -0,867976886 | -0,863153713       | 0,905410117  | 0,825720482 |
| oxoacid metabolic process                                               | -0,856241591 | -0,850063386       | 0,64279061   | 1,063514367 |
| negative regulation of cellular protein metabolic process               | -0,85748049  | -0,858782746       | 0,693147295  | 1,023115941 |
| neurogenesis                                                            | -0,857105444 | -0,857633695       | 0,684642119  | 1,03009702  |
| cell projection morphogenesis                                           | -0,86253887  | -0,863617274       | 0,762121683  | 0,964034461 |
| response to chemical stimulus                                           | -0,802946501 | -0,786610638       | 0,308376127  | 1,281181012 |
| negative regulation of macromolecule biosynthetic process               | -0,787712294 | -0,790664992       | 0,284847101  | 1,293530186 |
| divalent metal ion transport                                            | -0,831085624 | -0,778890402       | 0,354091671  | 1,255884355 |
| regulation of secretion                                                 | -0,772972992 | -0,789293294       | 0,252365294  | 1,309900992 |
| monovalent inorganic cation transport                                   | -0,770941342 | -0,797561854       | 0,26490422   | 1,303598976 |
| regulation of transmembrane transport                                   | -0,789637226 | -0,77671807        | 0,260469491  | 1,305885805 |
| positive regulation of protein metabolic process                        | -0,786337833 | -0,76089207        | 0,223271475  | 1,323958428 |
| cognition                                                               | -0,821857619 | -0,820479745       | 0,432114037  | 1,210223327 |
| negative regulation of nitrogen compound metabolic process              | -0,833281442 | -0,841029421       | 0,523584769  | 1,150726093 |
| spermatogenesis                                                         | -0,849022586 | -0,521764798       | -0,045151693 | 1,415939077 |

| GO Biological Process                                       | Enrichment z-score |              |              |              |
|-------------------------------------------------------------|--------------------|--------------|--------------|--------------|
|                                                             | 0-10%              | 10-50%       | 50-90%       | 90-100%      |
| cell development                                            | -0,691300834       | -0,712912652 | -0,014814087 | 1,419027573  |
| anatomical structure morphogenesis                          | -0,697966311       | -0,707531221 | -0,012978467 | 1,418475999  |
| pyridine nucleotide metabolic process                       | -0,719909932       | -0,721190828 | 0,041128648  | 1,399972112  |
| cellular nitrogen compound metabolic process                | -0,721457569       | -0,723381311 | 0,046979302  | 1,397859578  |
| positive regulation of cell death                           | -0,708518693       | -0,71626025  | 0,015979033  | 1,40879991   |
| biological regulation                                       | -0,776543967       | -0,690057135 | 0,083169326  | 1,383431777  |
| alcohol metabolic process                                   | -0,776543967       | -0,690057135 | 0,083169326  | 1,383431777  |
| actin filament-based process                                | -0,749582682       | -0,76263844  | 0,158991623  | 1,353229499  |
| purine ribonucleotide metabolic process                     | -0,751585137       | -0,74137722  | 0,125590166  | 1,367372191  |
| mRNA processing                                             | -0,708678501       | -0,799342353 | 0,153276236  | 1,354744618  |
| neuron projection development                               | -0,721407598       | -0,772094286 | 0,127006014  | 1,36649587   |
| regulation of anatomical structure size                     | -0,707479599       | -0,76533084  | 0,092527891  | 1,380282548  |
| regulation of protein localization                          | -0,063408486       | -1,358073293 | 0,976551978  | 0,444929802  |
| cellular protein catabolic process                          | 0,50025096         | -1,228685516 | 1,062347792  | -0,333913235 |
| generation of neurons                                       | -0,712107389       | 0,015219329  | 1,409067657  | -0,712179597 |
| generation of a signal involved in cell-cell signaling      | -0,712575677       | -0,076104387 | 1,437277208  | -0,648597144 |
| ion transmembrane transport                                 | -0,636097535       | -0,194929416 | 1,467197732  | -0,636170781 |
| reproduction                                                | -0,641339535       | -0,19721319  | 1,46765731   | -0,629104585 |
| cell-cell adhesion                                          | -0,742395565       | -0,165841981 | 1,45634069   | -0,548103144 |
| monosaccharide metabolic process                            | -0,555223137       | -0,526760029 | 1,497262296  | -0,41527913  |
| transmembrane transport                                     | -0,558319196       | -0,555403742 | 1,494842537  | -0,381119599 |
| purine ribonucleoside triphosphate metabolic process        | -0,576175076       | -0,565713539 | 1,491823146  | -0,34993453  |
| generation of precursor metabolites and energy              | -0,564913528       | -0,566709764 | 1,493019042  | -0,36139575  |
| positive regulation of intracellular protein kinase cascade | -0,653686659       | -0,504274335 | 1,486715126  | -0,328754132 |
| protein import                                              | -0,676891321       | -0,431949047 | 1,487285308  | -0,378444941 |
| nucleoside triphosphate biosynthetic process                | -0,531959334       | -0,493361767 | 1,499567779  | -0,474246678 |
| modification-dependent macromolecule catabolic process      | -0,549592054       | -0,476163493 | 1,499064795  | -0,473309248 |
| proton transport                                            | -0,542514359       | -0,506255767 | 1,498916715  | -0,450146589 |
| cell division                                               | -0,496066192       | -0,500806717 | 1,499993534  | -0,503120626 |
| regulation of RNA metabolic process                         | -0,496164362       | -0,506777133 | 1,499982651  | -0,497041156 |
| cell morphogenesis involved in differentiation              | -0,459512295       | -0,574991363 | 1,497847177  | -0,463343519 |
| response to nutrient                                        | -0,476721708       | -0,544501437 | 1,499248574  | -0,47802543  |
| regulation of protein phosphorylation                       | -0,564137908       | -0,37988827  | 1,494715541  | -0,550689363 |
| calcium ion homeostasis                                     | -0,55455112        | -0,389132665 | 1,495506701  | -0,551822917 |
| response to endogenous stimulus                             | -0,568498755       | -0,399904382 | 1,496126302  | -0,527723165 |
| heterocycle catabolic process                               | -0,553144883       | -0,439612289 | 1,498373689  | -0,505616516 |
| transcription, DNA-dependent                                | -0,545960189       | -0,423077594 | 1,497784826  | -0,528747043 |
| regulation of response to stimulus                          | -0,551256308       | -0,423279718 | 1,497735858  | -0,523199831 |
| mitochondrial membrane organization                         | -0,547013379       | -0,431716943 | 1,498186335  | -0,519456013 |
| regulation of apoptosis                                     | -0,446636508       | -0,665885772 | 1,488532307  | -0,376010027 |
| modification-dependent protein catabolic process            | -0,375958913       | -0,608821792 | 1,493163654  | -0,508382949 |
| chemotaxis                                                  | -0,35206387        | -0,630802605 | 1,490213957  | -0,507347481 |
| negative regulation of transport                            | -0,626638331       | -0,638794719 | 1,468959704  | -0,203526654 |
| positive regulation of metabolic process                    | -0,646372001       | -0,648139923 | 1,460962701  | -0,166450777 |
| positive regulation of cellular process                     | -0,676359737       | -0,668618822 | 1,444176624  | -0,099198065 |
| regulation of nucleotide metabolic process                  | -0,656680728       | -0,656809608 | 1,455100706  | -0,141610371 |
| nervous system development                                  | -0,663944042       | -0,663969157 | 1,45029194   | -0,122378741 |
| cell part morphogenesis                                     | -0,552723196       | -0,674232278 | 1,475799613  | -0,248844139 |
| positive regulation of signal transduction                  | -0,60297221        | -0,61666381  | 1,479413965  | -0,259777945 |
| hormone secretion                                           | -0,620375329       | -0,588266374 | 1,481438216  | -0,272796513 |
| cellular protein complex assembly                           | -0,576896956       | -0,579342513 | 1,49001537   | -0,333775901 |
| regulation of primary metabolic process                     | -0,60045378        | -0,572718272 | 1,487497428  | -0,314325376 |
| purine nucleotide biosynthetic process                      | -0,740744698       | -0,741224131 | 1,374927738  | 0,107041091  |

| GO Biological Process                               | Enrichment z-score |              |              |              |
|-----------------------------------------------------|--------------------|--------------|--------------|--------------|
|                                                     | 0-10%              | 10-50%       | 50-90%       | 90-100%      |
| negative regulation of molecular function           | -0,757046607       | -0,757458564 | 1,351505899  | 0,162999272  |
| macromolecule modification                          | -0,751559414       | -0,751992809 | 1,359777189  | 0,143775034  |
| regulation of macromolecule metabolic process       | -0,787925091       | -0,738396614 | 1,341570533  | 0,184751172  |
| cellular process                                    | -0,68226393        | -0,700935744 | 1,428683395  | -0,045483721 |
| ribonucleoside triphosphate biosynthetic process    | -0,698192689       | -0,716948232 | 1,413686701  | 0,00145422   |
| neuron differentiation                              | -0,711241799       | -0,729708442 | 1,399994029  | 0,040956212  |
| cellular nitrogen compound catabolic process        | -0,568105042       | -1,065583901 | 1,138805517  | 0,494883426  |
| proteasomal protein catabolic process               | -0,778823972       | -0,874732094 | 1,188131842  | 0,465424224  |
| maintenance of location                             | -0,822866608       | -0,829987447 | 1,192519993  | 0,460334062  |
| post-embryonic development                          | -0,830558828       | -0,815600798 | 1,203899072  | 0,442260553  |
| protein catabolic process                           | -0,848784383       | -0,858129087 | 1,061306133  | 0,645607337  |
| neuron development                                  | -0,846418079       | -0,725160339 | 1,297057023  | 0,274521395  |
| hexose metabolic process                            | -0,783238713       | -0,783602058 | 1,305440467  | 0,261400305  |
| purine nucleoside triphosphate biosynthetic process | -0,837839382       | -0,787249232 | 1,235514351  | 0,389574263  |
| system development                                  | -0,838066261       | -0,791163864 | 1,229650773  | 0,399579351  |
| amine metabolic process                             | -0,785766949       | -0,822076623 | 1,258993127  | 0,348850445  |
| anatomical structure development                    | -0,819836751       | -0,779954935 | 1,268868807  | 0,330922879  |
| response to hormone stimulus                        | -0,802703075       | -0,794021748 | 1,272931773  | 0,32379305   |
| protein targeting                                   | 1,451049721        | -0,649096723 | -0,676261666 | -0,125691332 |
| response to oxygen levels                           | 1,447680101        | -0,622144819 | -0,70975577  | -0,115779511 |
| protein targeting to membrane                       | 1,447680101        | -0,622144819 | -0,70975577  | -0,115779511 |
| divalent inorganic cation transport                 | 1,447680101        | -0,622144819 | -0,70975577  | -0,115779511 |
| protein phosphorylation                             | 1,434471596        | -0,683111698 | -0,686629141 | -0,064730756 |
| regulation of biological process                    | 1,44386436         | -0,728763636 | -0,611001295 | -0,104099429 |
| synaptic transmission                               | 1,44386436         | -0,728763636 | -0,611001295 | -0,104099429 |
| posttranscriptional regulation of gene expression   | 1,417437802        | -0,608945395 | -0,787146711 | -0,021345696 |
| regulation of metabolic process                     | 1,476881934        | -0,609692558 | -0,622123242 | -0,245066133 |
| regulation of intracellular protein kinase cascade  | 1,485016019        | -0,588987268 | -0,600309581 | -0,29571917  |
| tissue development                                  | 1,488145209        | -0,60201022  | -0,566335338 | -0,319799652 |
| regulation of cell death                            | 1,481785995        | -0,628592291 | -0,576950182 | -0,276243521 |
| translational initiation                            | 1,481621359        | -0,638087171 | -0,566452871 | -0,277081316 |
| cellular response to stimulus                       | 1,492848689        | -0,469937992 | -0,628476564 | -0,394434133 |
| phospholipid metabolic process                      | 1,492848689        | -0,469937992 | -0,628476564 | -0,394434133 |
| nitrogen compound transport                         | 1,492848689        | -0,469937992 | -0,628476564 | -0,394434133 |
| protein complex subunit organization                | 1,492848689        | -0,469937992 | -0,628476564 | -0,394434133 |
| regulation of protein polymerization                | 1,491345597        | -0,448359606 | -0,645895738 | -0,397090253 |
| nitrogen compound metabolic process                 | 1,487416626        | -0,499947054 | -0,652001405 | -0,335468168 |
| female gamete generation                            | 1,48406717         | -0,397897827 | -0,700151588 | -0,386017756 |
| metal ion homeostasis                               | 1,499432299        | -0,518584157 | -0,51993436  | -0,460913782 |
| negative regulation of gene expression              | 1,494829323        | -0,530211576 | -0,58007717  | -0,384540578 |
| axonogenesis                                        | 1,49788465         | -0,42528663  | -0,525353701 | -0,547244319 |
| glucose metabolic process                           | 1,495335409        | -0,387002267 | -0,554372221 | -0,553960921 |
| protein complex assembly                            | 1,495296112        | -0,389943196 | -0,528893005 | -0,576459912 |
| mitotic spindle elongation                          | 1,499726836        | -0,472991219 | -0,511677794 | -0,515057823 |
| regulation of cellular component biogenesis         | 1,499204525        | -0,488223593 | -0,466875106 | -0,544105826 |
| protein modification process                        | 1,489567075        | -0,652108422 | -0,367367689 | -0,470090964 |
| response to oxidative stress                        | 1,488949325        | -0,639255548 | -0,343016284 | -0,506677493 |
| mRNA metabolic process                              | 1,450002203        | -0,714946888 | -0,126497159 | -0,608558155 |
| smooth muscle contraction                           | 1,476140919        | -0,532940112 | -0,256927463 | -0,686273344 |
| axon guidance                                       | 1,317086074        | 0,237732704  | -0,773124758 | -0,781694021 |
| regulation of cytoskeleton organization             | 1,428401893        | -0,063052771 | -0,791309886 | -0,574039236 |
| steroid biosynthetic process                        | 1,428401893        | -0,063052771 | -0,791309886 | -0,574039236 |
| protein localization in mitochondrion               | 1,192374106        | -0,80460166  | -0,847979651 | 0,460207204  |

| GO Biological Process                           | Enrichment z-score |              |              |             |
|-------------------------------------------------|--------------------|--------------|--------------|-------------|
|                                                 | 0-10%              | 10-50%       | 50-90%       | 90-100%     |
| lipid metabolic process                         | 1,121690264        | -0,807015412 | -0,878803623 | 0,564128771 |
| ubiquitin-dependent protein catabolic process   | 1,142295819        | -0,790680324 | -0,885796535 | 0,53418104  |
| response to DNA damage stimulus                 | 1,28435718         | -0,79371053  | -0,793083839 | 0,302437189 |
| positive regulation of organelle organization   | 1,248220462        | -0,657682779 | -0,941423492 | 0,350885808 |
| protein targeting to mitochondrion              | 1,248220462        | -0,657682779 | -0,941423492 | 0,350885808 |
| maintenance of protein location                 | 0,874673254        | -0,799843689 | -0,929714351 | 0,854884786 |
| apoptosis                                       | 0,873252317        | -1,005678657 | -0,713938245 | 0,846364585 |
| ATP biosynthetic process                        | 0,107277583        | -0,789679454 | -0,69128677  | 1,373688641 |
| developmental process involved in reproduction  | 0,107277583        | -0,789679454 | -0,69128677  | 1,373688641 |
| cytokinesis                                     | 0,202369965        | -0,735829854 | -0,799879425 | 1,333339315 |
| cellular metal ion homeostasis                  | 0,262703205        | -0,779092486 | -0,788388605 | 1,304777886 |
| cellular developmental process                  | 0,389833817        | -0,83558585  | -0,789664957 | 1,23541699  |
| biosynthetic process                            | 0,458688862        | -0,805837769 | -0,846223035 | 1,193371943 |
| RNA splicing                                    | 0,575743895        | -0,872253293 | -0,81707795  | 1,113587349 |
| nucleoside monophosphate metabolic process      | 0,577885838        | -0,843124205 | -0,847180244 | 1,112418611 |
| steroid metabolic process                       | 0,598377719        | -0,834119846 | -0,861516759 | 1,097258885 |
| body fluid secretion                            | 0,598377719        | -0,834119846 | -0,861516759 | 1,097258885 |
| macromolecule biosynthetic process              | 0,60075571         | -0,830447178 | -0,865733426 | 1,095424894 |
| macromolecule catabolic process                 | 0,60075571         | -0,830447178 | -0,865733426 | 1,095424894 |
| purine-containing compound biosynthetic process | 0,53838542         | -1,08305198  | -0,560976001 | 1,105642562 |
