# Supplementary material for: Alteration of Protein Levels during Influenza Virus H1N1 Infection in Host Cells: A Proteomic Survey of Host and Virus Reveals Differential Dynamics
Source: PubMed Central journal article supplement (PMC3981805; doi:10.1371/journal.pone.0094257), 2014-04-09
Supplement: pone.0094257.s007.pdf [file pone.0094257.s007.pdf]

**Table S3:** Links to enriched GO terms for clusters and lists of genes in these clusters.

## Cluster 1

### Enriched Terms:

| Gene to GO BP<br>Conditional test for over-representation<br>GOBPID | Pvalue | OddsRatio | ExpCount | Count | Size | Term                                                         |
|---------------------------------------------------------------------|--------|-----------|----------|-------|------|--------------------------------------------------------------|
| GO:0043436                                                          | 0      | 2,017     | 26       | 43    | 181  | oxoacid metabolic process                                    |
| GO:0044248                                                          | 0      | 1,844     | 35       | 53    | 241  | cellular catabolic process                                   |
| GO:0006399                                                          | 0,001  | 3,693     | 5        | 12    | 32   | tRNA metabolic process                                       |
| GO:0006520                                                          | 0,001  | 2,591     | 9        | 19    | 66   | cellular amino acid metabolic process                        |
| GO:0006418                                                          | 0,002  | 3,827     | 4        | 10    | 26   | tRNA aminoacylation for protein translation                  |
| GO:0043038                                                          | 0,002  | 3,827     | 4        | 10    | 26   | amino acid activation                                        |
| GO:0006166                                                          | 0,003  | Inf       | 0        | 3     | 3    | purine ribonucleoside salvage                                |
| GO:0043086                                                          | 0,003  | 2,445     | 9        | 17    | 60   | negative regulation of catalytic activity                    |
| GO:0010033                                                          | 0,003  | 1,695     | 31       | 45    | 220  | response to organic substance                                |
| GO:0046686                                                          | 0,003  | 3,209     | 5        | 11    | 32   | response to cadmium ion                                      |
| GO:0070647                                                          | 0,004  | 2,176     | 12       | 21    | 81   | protein modification by small protein conjugation or removal |
| GO:0044282                                                          | 0,004  | 1,958     | 16       | 26    | 109  | small molecule catabolic process                             |
| GO:0006584                                                          | 0,005  | 12,075    | 1        | 4     | 6    | catecholamine metabolic process                              |
| GO:0018958                                                          | 0,005  | 12,075    | 1        | 4     | 6    | phenol-containing compound metabolic process                 |
| GO:0034311                                                          | 0,005  | 12,075    | 1        | 4     | 6    | diol metabolic process                                       |
| GO:0006749                                                          | 0,006  | 5,198     | 2        | 6     | 13   | glutathione metabolic process                                |
| GO:0043200                                                          | 0,006  | 5,198     | 2        | 6     | 13   | response to amino acid stimulus                              |
| GO:0042176                                                          | 0,006  | 4,253     | 2        | 7     | 17   | regulation of protein catabolic process                      |
| GO:0000910                                                          | 0,007  | 2,573     | 6        | 13    | 44   | cytokinesis                                                  |
| GO:0043523                                                          | 0,008  | 3,227     | 4        | 9     | 26   | regulation of neuron apoptosis                               |
| GO:0010243                                                          | 0,008  | 2,624     | 6        | 12    | 40   | response to organic nitrogen                                 |
| GO:0006144                                                          | 0,008  | 6,049     | 1        | 5     | 10   | purine base metabolic process                                |
| GO:0010038                                                          | 0,008  | 2,393     | 7        | 14    | 51   | response to metal ion                                        |
| GO:0009636                                                          | 0,008  | 3,476     | 3        | 8     | 22   | response to toxin                                            |
| GO:0016055                                                          | 0,009  | 4,545     | 2        | 6     | 14   | Wnt receptor signaling pathway                               |
| GO:0006725                                                          | 0,009  | 2,689     | 5        | 11    | 36   | cellular aromatic compound metabolic process                 |
| GO:0044106                                                          | 0,01   | 5,432     | 1        | 5     | 11   | cellular amine metabolic process                             |

### Genes in Cluster:

| Entrez Id | Symbol    | description                                          |
|-----------|-----------|------------------------------------------------------|
| 607306    | VPS4B     | vacuolar protein sorting 4 homolog B (S. cerevisiae) |
| 474394    | RAB5B     | RAB5B, member RAS oncogene family                    |
| 483970    | TXNL1     | thioredoxin-like 1                                   |
| 481459    | LOC481459 | similar to sequestosome 1                            |

|        |           |                                                                                                                                                                                           |
|--------|-----------|-------------------------------------------------------------------------------------------------------------------------------------------------------------------------------------------|
| 476242 | PCMT1     | protein-L-isoaspartate (D-aspartate) O-methyltransferase                                                                                                                                  |
| 475043 | HRSP12    | heat-responsive protein 12                                                                                                                                                                |
| 481486 | ALDH7A1   | aldehyde dehydrogenase 7 family, member A1                                                                                                                                                |
| 474844 | CSNK2B    | casein kinase 2, beta polypeptide                                                                                                                                                         |
| 474847 | CLIC1     | chloride intracellular channel 1                                                                                                                                                          |
| 481716 | VARS      | valyl-tRNA synthetase                                                                                                                                                                     |
| 484056 | EZR       | ezrin                                                                                                                                                                                     |
| 475073 | NUDCD1    | NudC domain containing 1                                                                                                                                                                  |
| 484063 | ACAT2     | acetyl-CoA acetyltransferase 2                                                                                                                                                            |
| 475081 | EIF3H     | eukaryotic translation initiation factor 3, subunit H                                                                                                                                     |
| 474484 | LOC474484 | similar to NHP2-like protein 1 (High mobility group-like nuclear protein 2 homolog 1) ([U4/U6.U5] tri-snRNP 15.5 kDa protein) (Sperm specific antigen 1) (Fertilization antigen 1) (FA-1) |
| 474487 | ACO2      | aconitase 2, mitochondrial                                                                                                                                                                |
| 482049 | NDRG1     | N-myc downstream regulated 1                                                                                                                                                              |
| 475116 | TSTA3     | tissue specific transplantation antigen P35B                                                                                                                                              |
| 607245 | PUF60     | poly-U binding splicing factor 60KDa                                                                                                                                                      |
| 475189 | COPG2     | coatamer protein complex, subunit gamma 2                                                                                                                                                 |
| 474894 | GLO1      | glyoxalase I                                                                                                                                                                              |
| 607816 | UBE2H     | ubiquitin-conjugating enzyme E2H                                                                                                                                                          |
| 474712 | PSIP1     | PC4 and SFRS1 interacting protein 1                                                                                                                                                       |
| 476318 | PSAT1     | phosphoserine aminotransferase 1                                                                                                                                                          |
| 484161 | OSTF1     | osteoclast stimulating factor 1                                                                                                                                                           |
| 482283 | CROT      | carnitine O-octanoyltransferase                                                                                                                                                           |
| 474912 | POLR1C    | polymerase (RNA) I polypeptide C, 30kDa                                                                                                                                                   |
| 403854 | TJP2      | tight junction protein 2 (zona occludens 2)                                                                                                                                               |
| 474536 | TXNRD1    | thioredoxin reductase 1                                                                                                                                                                   |
| 609920 | CDK6      | cyclin-dependent kinase 6                                                                                                                                                                 |
| 476337 | LOC476337 | similar to D19Bwg1357e protein                                                                                                                                                            |
| 474928 | CD2AP     | CD2-associated protein                                                                                                                                                                    |
| 474759 | TLN1      | talin 1                                                                                                                                                                                   |
| 611407 | PPAT      | phosphoribosyl pyrophosphate amidotransferase                                                                                                                                             |
| 494002 | MSH2      | mutS homolog 2, colon cancer, nonpolyposis type 1 (E. coli)                                                                                                                               |
| 474798 | LOC474798 | similar to Thioredoxin (ATL-derived factor) (ADF) (Surface associated sulphhydryl protein) (SASP)                                                                                         |
| 475170 | GRSF1     | G-rich RNA sequence binding factor 1                                                                                                                                                      |
| 474981 | PGM3      | phosphoglucomutase 3                                                                                                                                                                      |
| 403709 | ME1       | malic enzyme 1, NADP(+)-dependent, cytosolic                                                                                                                                              |
| 474802 | PTGR1     | prostaglandin reductase 1                                                                                                                                                                 |
| 474609 | XPO1      | exportin 1 (CRM1 homolog, yeast)                                                                                                                                                          |
| 475499 | OGDH      | oxoglutarate (alpha-ketoglutarate) dehydrogenase (lipoamide)                                                                                                                              |
| 481396 | ACTR2     | ARP2 actin-related protein 2 homolog (yeast)                                                                                                                                              |
| 475284 | SEPT7     | septin 7                                                                                                                                                                                  |
| 475506 | NUP205    | nucleoporin 205kDa                                                                                                                                                                        |
| 482401 | ANLN      | anillin, actin binding protein                                                                                                                                                            |
| 606756 | ANXA4     | annexin A4                                                                                                                                                                                |
| 403487 | MTPN      | myotrophin                                                                                                                                                                                |
| 475293 | TES       | testis derived transcript (3 LIM domains)                                                                                                                                                 |
| 474703 | PSMD5     | proteasome (prosome, macropain) 26S subunit, non-ATPase, 5                                                                                                                                |
| 482736 | ZYX       | zyxin                                                                                                                                                                                     |
| 481945 | PREP      | prolyl endopeptidase                                                                                                                                                                      |
| 483817 | NAA15     | N(alpha)-acetyltransferase 15, NatA auxiliary subunit                                                                                                                                     |
| 613007 | SNX3      | sorting nexin 3                                                                                                                                                                           |
| 476506 | ALDH1L1   | aldehyde dehydrogenase 1 family, member L1                                                                                                                                                |
| 483267 | NAMPT     | nicotinamide phosphoribosyltransferase                                                                                                                                                    |
| 476094 | ANXA5     | annexin A5                                                                                                                                                                                |

|        |           |                                                                                   |
|--------|-----------|-----------------------------------------------------------------------------------|
| 475897 | PMPCB     | peptidase (mitochondrial processing) beta                                         |
| 476425 | SAE1      | SUMO1 activating enzyme subunit 1                                                 |
| 475896 | PSMC2     | proteasome (prosome, macropain) 26S subunit, ATPase, 2                            |
| 607058 | LOC607058 | similar to SVH protein                                                            |
| 476434 | EML2      | echinoderm microtubule associated protein like 2                                  |
| 607116 | ESD       | esterase D                                                                        |
| 475156 | LOC475156 | similar to peroxiredoxin 1                                                        |
| 477993 | RSU1      | Ras suppressor protein 1                                                          |
| 477015 | PDCD6IP   | programmed cell death 6 interacting protein                                       |
| 474963 | SUMO2     | SMT3 suppressor of mif two 3 homolog 2 ( <i>S. cerevisiae</i> )                   |
| 475913 | NUP85     | nucleoporin 85kDa                                                                 |
| 478006 | NUDT5     | nudix (nucleoside diphosphate linked moiety X)-type motif 5                       |
| 476449 | PAFAH1B3  | platelet-activating factor acetylhydrolase 1b, catalytic subunit 3 (29kDa)        |
| 607809 | OXS1      | oxidative-stress responsive 1                                                     |
| 483322 | ACOX1     | acyl-CoA oxidase 1, palmitoyl                                                     |
| 476947 | UCHL3     | ubiquitin carboxyl-terminal esterase L3 (ubiquitin thiolesterase)                 |
| 476131 | MCM6      | minichromosome maintenance complex component 6                                    |
| 483343 | TK1       | thymidine kinase 1, soluble                                                       |
| 476456 | BLVRB     | biliverdin reductase B (flavin reductase (NADPH))                                 |
| 476459 | PSMC4     | proteasome (prosome, macropain) 26S subunit, ATPase, 4                            |
| 483345 | LGALS3BP  | lectin, galactoside-binding, soluble, 3 binding protein                           |
| 483372 | PYCR1     | pyrroline-5-carboxylate reductase 1                                               |
| 476470 | PSMD8     | proteasome (prosome, macropain) 26S subunit, non-ATPase, 8                        |
| 476823 | RRM1      | ribonucleotide reductase M1                                                       |
| 476552 | TRNT1     | tRNA nucleotidyl transferase, CCA-adding, 1                                       |
| 477297 | UFM1      | ubiquitin-fold modifier 1                                                         |
| 482611 | LTA4H     | leukotriene A4 hydrolase                                                          |
| 611746 | CAPNS1    | calpain, small subunit 1                                                          |
| 608169 | FKBP1A    | FK506 binding protein 1A, 12kDa                                                   |
| 477550 | LOC477550 | similar to poly(rC) binding protein 2 (predicted)                                 |
| 482897 | ASAH1     | N-acylsphingosine amidohydrolase (acid ceramidase) 1                              |
| 476490 | UBA2      | ubiquitin-like modifier activating enzyme 2                                       |
| 485383 | IPO7      | importin 7                                                                        |
| 477901 | COPS5     | COP9 constitutive photomorphogenic homolog subunit 5 ( <i>Arabidopsis</i> )       |
| 485842 | CHMP4B    | chromatin modifying protein 4B                                                    |
| 476499 | PDCD5     | programmed cell death 5                                                           |
| 475454 | ABCE1     | ATP-binding cassette, sub-family E (OABP), member 1                               |
| 483448 | OSBP      | oxysterol binding protein                                                         |
| 607073 | ARF4      | ADP-ribosylation factor 4                                                         |
| 486077 | CTSB      | cathepsin B                                                                       |
| 477610 | LIMA1     | LIM domain and actin binding 1                                                    |
| 477213 | CPNE1     | copine I                                                                          |
| 475781 | HK2       | hexokinase 2                                                                      |
| 478103 | GOT2      | glutamic-oxaloacetic transaminase 2, mitochondrial (aspartate aminotransferase 2) |
| 478111 | CIAPIN1   | cytokine induced apoptosis inhibitor 1                                            |
| 486559 | PRKAG1    | protein kinase, AMP-activated, gamma 1 non-catalytic subunit                      |
| 486107 | DPYSL2    | dihydropyrimidinase-like 2                                                        |
| 479165 | LOC479165 | similar to Dihydrofolate reductase                                                |
| 485866 | RPRD1B    | regulation of nuclear pre-mRNA domain containing 1B                               |
| 477374 | PPP2R2A   | protein phosphatase 2, regulatory subunit B, alpha                                |
| 483118 | SPR       | sepiapterin reductase (7,8-dihydrobiopterin:NADP+ oxidoreductase)                 |
| 478453 | SEC31A    | SEC31 homolog A ( <i>S. cerevisiae</i> )                                          |
| 478455 | COPS4     | COP9 constitutive photomorphogenic homolog subunit 4 ( <i>Arabidopsis</i> )       |
| 478259 | IVD       | isovaleryl-CoA dehydrogenase                                                      |

|        |           |                                                                                   |
|--------|-----------|-----------------------------------------------------------------------------------|
| 483631 | ARHGAP1   | Rho GTPase activating protein 1                                                   |
| 479173 | TBCA      | tubulin folding cofactor A                                                        |
| 477501 | PEBP1     | phosphatidylethanolamine binding protein 1                                        |
| 478482 | PDLIM5    | PDZ and LIM domain 5                                                              |
| 475998 | CARS      | cysteinyl-tRNA synthetase                                                         |
| 478625 | NSUN2     | NOP2/Sun domain family, member 2                                                  |
| 478148 | YARS      | tyrosyl-tRNA synthetase                                                           |
| 477649 | DNM1L     | dynammin 1-like                                                                   |
| 478958 | UCHL5     | ubiquitin carboxyl-terminal hydrolase L5                                          |
| 477813 | GSTO1     | glutathione S-transferase omega 1                                                 |
| 478424 | CSTB      | cystatin B (stefin B)                                                             |
| 486880 | XPNPEP1   | X-prolyl aminopeptidase (aminopeptidase P) 1, soluble                             |
| 403532 | TNNT2     | troponin T type 2 (cardiac)                                                       |
| 478500 | PPA2      | pyrophosphatase (inorganic) 2                                                     |
| 487893 | AIMP1     | aminoacyl tRNA synthetase complex-interacting multifunctional protein 1           |
| 609549 | PDCD6     | programmed cell death 6                                                           |
| 475822 | ACP6      | acid phosphatase 6, lysophosphatidic                                              |
| 478156 | FABP3     | fatty acid binding protein 3, muscle and heart (mammary-derived growth inhibitor) |
| 611914 | SNRNP40   | small nuclear ribonucleoprotein 40kDa (U5)                                        |
| 480242 | PRMT5     | protein arginine methyltransferase 5                                              |
| 477257 | CSE1L     | CSE1 chromosome segregation 1-like (yeast)                                        |
| 475191 | LOC475191 | similar to Glutathione S-transferase P (GST 7-7) (Chain 7) (GST class-pi)         |
| 477262 | UBE2V1    | ubiquitin-conjugating enzyme E2 variant 1                                         |
| 483177 | SF3B4     | splicing factor 3b, subunit 4, 49kDa                                              |
| 488622 | MNDA      | myeloid cell nuclear differentiation antigen                                      |
| 606979 | DCUN1D1   | DCN1, defective in cullin neddylation 1, domain containing 1 (S. cerevisiae)      |
| 479203 | TSNAX     | translin-associated factor X                                                      |
| 480256 | PSME1     | proteasome (prosome, macropain) activator subunit 1 (PA28 alpha)                  |
| 480846 | PIR       | pirin (iron-binding nuclear protein)                                              |
| 485942 | RAE1      | RAE1 RNA export 1 homolog (S. pombe)                                              |
| 480260 | IPO4      | importin 4                                                                        |
| 486344 | AP1B1     | adaptor-related protein complex 1, beta 1 subunit                                 |
| 478250 | ACTC1     | actin, alpha, cardiac muscle 1                                                    |
| 475101 | LOC475101 | similar to L-lactate dehydrogenase B chain (LDH-B) (LDH heart subunit) (LDH-H)    |
| 487349 | NUDC      | nuclear distribution gene C homolog (A. nidulans)                                 |
| 477845 | SEC23IP   | SEC23 interacting protein                                                         |
| 610113 | PEA15     | phosphoprotein enriched in astrocytes 15                                          |
| 477538 | SF3A1     | splicing factor 3a, subunit 1, 120kDa                                             |
| 475846 | PIP5K1A   | phosphatidylinositol-4-phosphate 5-kinase, type I, alpha                          |
| 478654 | PSMD2     | proteasome (prosome, macropain) 26S subunit, non-ATPase, 2                        |
| 488395 | GORASP2   | golgi reassembly stacking protein 2, 55kDa                                        |
| 479050 | IQGAP1    | IQ motif containing GTPase activating protein 1                                   |
| 478595 | SNX4      | sorting nexin 4                                                                   |
| 480281 | SCFD1     | sec1 family domain containing 1                                                   |
| 480478 | PSMC5     | proteasome (prosome, macropain) 26S subunit, ATPase, 5                            |
| 477858 | OAT       | ornithine aminotransferase                                                        |
| 478656 | POLR2H    | polymerase (RNA) II (DNA directed) polypeptide H                                  |
| 477430 | PPP1R7    | protein phosphatase 1, regulatory (inhibitor) subunit 7                           |
| 478799 | LOC478799 | similar to histone aminotransferase 1 (predicted)                                 |
| 488997 | CDK1      | cyclin-dependent kinase 1                                                         |
| 484781 | MAP4      | microtubule-associated protein 4                                                  |
| 480858 | PDHA1     | pyruvate dehydrogenase (lipoamide) alpha 1                                        |
| 612814 | PAK2      | p21 protein (Cdc42/Rac)-activated kinase 2                                        |
| 487373 | GALE      | UDP-galactose-4-epimerase                                                         |

|        |           |                                                                                         |
|--------|-----------|-----------------------------------------------------------------------------------------|
| 478803 | OLA1      | Obg-like ATPase 1                                                                       |
| 487374 | LYPLA2    | lysophospholipase II                                                                    |
| 490649 | CFL2      | cofilin 2 (muscle)                                                                      |
| 480828 | ECHS1     | enoyl CoA hydratase, short chain, 1, mitochondrial                                      |
| 482601 | LOC482601 | similar to malate dehydrogenase 2, NAD (mitochondrial)                                  |
| 403979 | HSPB1     | heat shock 27kDa protein 1                                                              |
| 478889 | IDH1      | isocitrate dehydrogenase 1 (NADP+), soluble                                             |
| 479227 | HNRNPH3   | heterogeneous nuclear ribonucleoprotein H3 (2H9)                                        |
| 483743 | DPF2      | D4, zinc and double PHD fingers family 2                                                |
| 479233 | VPS26A    | vacuolar protein sorting 26 homolog A (S. pombe)                                        |
| 607589 | DDT       | D-dopachrome tautomerase                                                                |
| 479238 | PPA1      | pyrophosphatase (inorganic) 1                                                           |
| 477558 | LOC477558 | similar to Glutathione S-transferase theta 2 (GST class-theta 2)                        |
| 479066 | IDH3A     | isocitrate dehydrogenase 3 (NAD+) alpha                                                 |
| 477563 | RANBP1    | RAN binding protein 1                                                                   |
| 479444 | PPP2R1B   | protein phosphatase 2, regulatory subunit A, beta                                       |
| 480772 | UPP1      | uridine phosphorylase 1                                                                 |
| 609526 | DUT       | deoxyuridine triphosphatase                                                             |
| 488784 | GRPEL1    | GrpE-like 1, mitochondrial (E. coli)                                                    |
| 479240 | PSAP      | prosaposin                                                                              |
| 486715 | LPCAT3    | lysophosphatidylcholine acyltransferase 3                                               |
| 476032 | PRDX5     | peroxiredoxin 5                                                                         |
| 480069 | PRDX6     | peroxiredoxin 6                                                                         |
| 486718 | USP5      | ubiquitin specific peptidase 5 (isopeptidase T)                                         |
| 478907 | ARPC2     | actin related protein 2/3 complex, subunit 2, 34kDa                                     |
| 490953 | VAT1      | vesicle amine transport protein 1 homolog (T. californica)                              |
| 479737 | MCM7      | minichromosome maintenance complex component 7                                          |
| 479246 | ANXA7     | annexin A7                                                                              |
| 478686 | PRKCI     | protein kinase C, iota                                                                  |
| 480325 | GNPNAT1   | glucosamine-phosphate N-acetyltransferase 1                                             |
| 478295 | COPS2     | COP9 constitutive photomorphogenic homolog subunit 2 (Arabidopsis)                      |
| 612835 | SEC24C    | SEC24 family, member C (S. cerevisiae)                                                  |
| 490342 | METTL13   | methyltransferase like 13                                                               |
| 479744 | ARPC1B    | actin related protein 2/3 complex, subunit 1B, 41kDa                                    |
| 479081 | LAP3      | leucine aminopeptidase 3                                                                |
| 610090 | PGLS      | 6-phosphogluconolactonase                                                               |
| 477572 | UBE2L3    | ubiquitin-conjugating enzyme E2L 3                                                      |
| 480084 | TIPRL     | TIP41, TOR signaling pathway regulator-like (S. cerevisiae)                             |
| 479253 | ADK       | adenosine kinase                                                                        |
| 486736 | LOC486736 | similar to chromosome 12 open reading frame 5                                           |
| 609457 | RBM3      | RNA binding motif (RNP1, RRM) protein 3                                                 |
| 403955 | RAC1      | ras-related C3 botulinum toxin substrate 1 (rho family, small GTP binding protein Rac1) |
| 487412 | RCC2      | regulator of chromosome condensation 2                                                  |
| 607466 | PSMB6     | proteasome (prosome, macropain) subunit, beta type, 6                                   |
| 479107 | UGDH      | UDP-glucose 6-dehydrogenase                                                             |
| 480525 | TOP2A     | topoisomerase (DNA) II alpha 170kDa                                                     |
| 479270 | ANXA8     | annexin A8                                                                              |
| 476066 | CPSF7     | cleavage and polyadenylation specific factor 7, 59kDa                                   |
| 611923 | SRP9      | signal recognition particle 9kDa                                                        |
| 607254 | LOC607254 | similar to EF hand domain containing 2                                                  |
| 480364 | ARG2      | arginase, type II                                                                       |
| 475298 | NAA38     | N(alpha)-acetyltransferase 38, NatC auxiliary subunit                                   |
| 491924 | MSN       | moesin                                                                                  |
| 480538 | NPEPPS    | aminopeptidase puromycin sensitive                                                      |

|        |           |                                                                                                                          |
|--------|-----------|--------------------------------------------------------------------------------------------------------------------------|
| 612089 | HDGF      | hepatoma-derived growth factor                                                                                           |
| 610314 | RBM25     | RNA binding motif protein 25                                                                                             |
| 490779 | ALDH6A1   | aldehyde dehydrogenase 6 family, member A1                                                                               |
| 480129 | FDPS      | farnesyl diphosphate synthase                                                                                            |
| 609803 | RARS      | arginyl-tRNA synthetase                                                                                                  |
| 476695 | FARSA     | phenylalanyl-tRNA synthetase, alpha subunit                                                                              |
| 403892 | SULT1A1   | sulfotransferase family, cytosolic, 1A, phenol-preferring, member 1                                                      |
| 480955 | OGT       | O-linked N-acetylglucosamine (GlcNAc) transferase (UDP-N-acetylglucosamine:polypeptide-N-acetylglucosaminyl transferase) |
| 491969 | LOC491969 | similar to CG7519-PA                                                                                                     |
| 480135 | UBAP2L    | ubiquitin associated protein 2-like                                                                                      |
| 480566 | SCPEP1    | serine carboxypeptidase 1                                                                                                |
| 478355 | KIF23     | kinesin family member 23                                                                                                 |
| 612322 | LOC612322 | similar to S100 calcium binding protein A14                                                                              |
| 403787 | S100A4    | S100 calcium binding protein A4                                                                                          |
| 492015 | CSTF2     | cleavage stimulation factor, 3' pre-RNA, subunit 2, 64kDa                                                                |
| 480143 | S100A6    | S100 calcium binding protein A6                                                                                          |
| 490465 | KATNAL2   | katanin p60 subunit A-like 2                                                                                             |
| 403713 | ATOX1     | ATX1 antioxidant protein 1 homolog (yeast)                                                                               |
| 611273 | MRPL4     | mitochondrial ribosomal protein L4                                                                                       |
| 480435 | WARS      | tryptophanyl-tRNA synthetase                                                                                             |
| 484963 | PIN1      | peptidylprolyl cis/trans isomerase, NIMA-interacting 1                                                                   |
| 490508 | PSMA8     | proteasome (prosome, macropain) subunit, alpha type, 8                                                                   |
| 489536 | SHMT1     | serine hydroxymethyltransferase 1 (soluble)                                                                              |
| 489547 | MAP2K3    | mitogen-activated protein kinase kinase 3                                                                                |
| 479545 | PGM1      | phosphoglucomutase 1                                                                                                     |
| 492128 | UTP14A    | UTP14, U3 small nucleolar ribonucleoprotein, homolog A (yeast)                                                           |
| 608647 | NAPG      | N-ethylmaleimide-sensitive factor attachment protein, gamma                                                              |
| 479548 | DOCK7     | dedicator of cytokinesis 7                                                                                               |
| 479370 | TARS      | threonyl-tRNA synthetase                                                                                                 |
| 442945 | HPRT1     | hypoxanthine phosphoribosyltransferase 1                                                                                 |
| 479854 | USP7      | ubiquitin specific peptidase 7 (herpes virus-associated)                                                                 |
| 485039 | SH3GL1    | SH3-domain GRB2-like 1                                                                                                   |
| 480640 | GLOD4     | glyoxalase domain containing 4                                                                                           |
| 490021 | PPL       | periplakin                                                                                                               |
| 610939 | LOC610939 | similar to LSM5 homolog, U6 small nuclear RNA associated                                                                 |
| 490032 | TRAP1     | TNF receptor-associated protein 1                                                                                        |
| 491221 | TAX1BP3   | Tax1 (human T-cell leukemia virus type I) binding protein 3                                                              |
| 485067 | SGTA      | small glutamine-rich tetratricopeptide repeat (TPR)-containing, alpha                                                    |
| 489622 | LRRC47    | leucine rich repeat containing 47                                                                                        |
| 481084 | FLNA      | filamin A, alpha                                                                                                         |
| 479589 | ACOT7     | acyl-CoA thioesterase 7                                                                                                  |
| 481088 | G6PD      | glucose-6-phosphate dehydrogenase                                                                                        |
| 479595 | PARK7     | parkinson protein 7                                                                                                      |
| 490124 | SARS      | seryl-tRNA synthetase                                                                                                    |
| 479615 | APRT      | adenine phosphoribosyltransferase                                                                                        |
| 489680 | LOC489680 | similar to coactosin-like 1                                                                                              |
| 609752 | HSBP1     | heat shock factor binding protein 1                                                                                      |
| 479937 | CNN3      | calponin 3, acidic                                                                                                       |
| 480712 | AK1       | adenylate kinase 1                                                                                                       |
| 479654 | GLG1      | golgi glycoprotein 1                                                                                                     |
| 609251 | LOC609251 | similar to niban protein                                                                                                 |
| 479656 | AARS      | alanyl-tRNA synthetase                                                                                                   |
| 479658 | DDX19A    | DEAD (Asp-Glu-Ala-As) box polypeptide 19A                                                                                |
| 610935 | NQO1      | NAD(P)H dehydrogenase, quinone 1                                                                                         |

|        |           |                                                                            |
|--------|-----------|----------------------------------------------------------------------------|
| 480741 | NDUFA8    | NADH dehydrogenase (ubiquinone) 1 alpha subcomplex, 8, 19kDa               |
| 479681 | NUTF2     | nuclear transport factor 2                                                 |
| 490207 | ACADM     | acyl-CoA dehydrogenase, C-4 to C-12 straight chain                         |
| 479693 | LOC479693 | similar to Dynein light intermediate chain 2, cytosolic (LIC53/55) (LIC-2) |
| 479991 | CTH       | cystathionase (cystathionine gamma-lyase)                                  |
| 403954 | RHOA      | ras homolog gene family, member A                                          |
| 403686 | HMGN2     | non-histone chromosomal protein HMG-17                                     |
| 478123 | NUDT21    | nudix (nucleoside diphosphate linked moiety X)-type motif 21               |
| 479731 | SRRT      | serrate RNA effector molecule homolog (Arabidopsis)                        |
| 610164 | CBR1      | carbonyl reductase 1                                                       |
| 474939 | GSTA4     | glutathione S-transferase A4                                               |
| 476177 | SERPINB5  | serpin peptidase inhibitor, clade B (ovalbumin), member 5                  |
| 483402 | RNH1      | ribonuclease/angiogenin inhibitor 1                                        |
| 476022 | CFL1      | cofilin 1 (non-muscle)                                                     |

## Cluster 2

### Enriched Terms:

| Gene to GO BP<br>Conditional test for over-representation<br>GOBPID | Pvalue | OddsRatio | ExpCount | Count | Size | Term                                                                                           |
|---------------------------------------------------------------------|--------|-----------|----------|-------|------|------------------------------------------------------------------------------------------------|
| GO:0031397                                                          | 0      | 10,836    | 6        | 25    | 37   | negative regulation of protein ubiquitination                                                  |
| GO:0051352                                                          | 0      | 11,318    | 6        | 24    | 35   | negative regulation of ligase activity                                                         |
| GO:0051436                                                          | 0      | 11,318    | 6        | 24    | 35   | negative regulation of ubiquitin-protein ligase activity involved in mitotic cell cycle        |
| GO:0051437                                                          | 0      | 9,996     | 7        | 25    | 38   | positive regulation of ubiquitin-protein ligase activity involved in mitotic cell cycle        |
| GO:0051351                                                          | 0      | 9,029     | 7        | 26    | 41   | positive regulation of ligase activity                                                         |
| GO:0051438                                                          | 0      | 8,459     | 7        | 26    | 42   | regulation of ubiquitin-protein ligase activity                                                |
| GO:0032446                                                          | 0      | 5,462     | 12       | 35    | 69   | protein modification by small protein conjugation                                              |
| GO:0031145                                                          | 0      | 9,564     | 6        | 24    | 37   | anaphase-promoting complex-dependent proteasomal ubiquitin-dependent protein catabolic process |
| GO:0031398                                                          | 0      | 7,956     | 7        | 26    | 43   | positive regulation of protein ubiquitination                                                  |
| GO:0006511                                                          | 0      | 4,923     | 13       | 37    | 77   | ubiquitin-dependent protein catabolic process                                                  |
| GO:0044257                                                          | 0      | 4,6       | 14       | 38    | 82   | cellular protein catabolic process                                                             |
| GO:0043632                                                          | 0      | 4,682     | 14       | 37    | 79   | modification-dependent macromolecule catabolic process                                         |
| GO:0048523                                                          | 0      | 2,389     | 56       | 95    | 327  | negative regulation of cellular process                                                        |
| GO:0010498                                                          | 0      | 5,404     | 10       | 29    | 57   | proteasomal protein catabolic process                                                          |
| GO:0032270                                                          | 0      | 4,221     | 13       | 33    | 74   | positive regulation of cellular protein metabolic process                                      |
| GO:0044092                                                          | 0      | 4,184     | 12       | 32    | 72   | negative regulation of molecular function                                                      |
| GO:0048522                                                          | 0      | 2,185     | 58       | 94    | 341  | positive regulation of cellular process                                                        |
| GO:0031399                                                          | 0      | 3,363     | 18       | 40    | 103  | regulation of protein modification process                                                     |
| GO:0032269                                                          | 0      | 4,146     | 12       | 31    | 70   | negative regulation of cellular protein metabolic process                                      |
| GO:0009057                                                          | 0      | 3,08      | 21       | 45    | 123  | macromolecule catabolic process                                                                |
| GO:0044093                                                          | 0      | 3         | 21       | 44    | 122  | positive regulation of molecular function                                                      |
| GO:0050790                                                          | 0      | 2,636     | 25       | 48    | 145  | regulation of catalytic activity                                                               |
| GO:0051246                                                          | 0      | 2,484     | 28       | 52    | 164  | regulation of protein metabolic process                                                        |
| GO:0006508                                                          | 0      | 2,525     | 26       | 48    | 149  | proteolysis                                                                                    |
| GO:0022402                                                          | 0      | 2,585     | 23       | 44    | 138  | cell cycle process                                                                             |
| GO:0031323                                                          | 0      | 1,883     | 65       | 95    | 378  | regulation of cellular metabolic process                                                       |
| GO:0010604                                                          | 0      | 2,482     | 23       | 43    | 134  | positive regulation of macromolecule metabolic process                                         |
| GO:0043412                                                          | 0      | 2         | 47       | 73    | 272  | macromolecule modification                                                                     |
| GO:0009056                                                          | 0      | 5,86      | 4        | 14    | 27   | catabolic process                                                                              |
| GO:0000278                                                          | 0      | 3,223     | 11       | 25    | 68   | mitotic cell cycle                                                                             |



|                   |       |        |     |     |     |                                                            |
|-------------------|-------|--------|-----|-----|-----|------------------------------------------------------------|
| <b>GO:0010605</b> | 0     | 2,158  | 26  | 45  | 154 | negative regulation of macromolecule metabolic process     |
| <b>GO:0050789</b> | 0     | 1,666  | 126 | 155 | 789 | regulation of biological process                           |
| <b>GO:0012501</b> | 0     | 1,945  | 36  | 57  | 212 | programmed cell death                                      |
| <b>GO:0019320</b> | 0     | 4,378  | 5   | 14  | 30  | hexose catabolic process                                   |
| <b>GO:0032271</b> | 0     | 4,378  | 5   | 14  | 30  | regulation of protein polymerization                       |
| <b>GO:0006606</b> | 0     | 3,648  | 7   | 16  | 38  | protein import into nucleus                                |
| <b>GO:0044087</b> | 0     | 3,058  | 9   | 20  | 53  | regulation of cellular component biogenesis                |
| <b>GO:0046164</b> | 0     | 4,118  | 5   | 14  | 31  | alcohol catabolic process                                  |
| <b>GO:0007015</b> | 0     | 2,948  | 10  | 21  | 57  | actin filament organization                                |
| <b>GO:0033365</b> | 0     | 2,59   | 13  | 25  | 74  | protein localization to organelle                          |
| <b>GO:0007346</b> | 0     | 3,886  | 5   | 14  | 32  | regulation of mitotic cell cycle                           |
| <b>GO:0006096</b> | 0     | 4,971  | 4   | 11  | 22  | glycolysis                                                 |
| <b>GO:0016265</b> | 0     | 1,814  | 38  | 57  | 222 | death                                                      |
| <b>GO:0071822</b> | 0,001 | 1,86   | 32  | 49  | 186 | protein complex subunit organization                       |
| <b>GO:0044275</b> | 0,001 | 3,409  | 6   | 15  | 37  | cellular carbohydrate catabolic process                    |
| <b>GO:0030216</b> | 0,001 | 8,628  | 2   | 7   | 11  | keratinocyte differentiation                               |
| <b>GO:0006458</b> | 0,001 | 6,586  | 2   | 8   | 14  | 'de novo' protein folding                                  |
| <b>GO:0051086</b> | 0,001 | Inf    | 1   | 4   | 4   | chaperone mediated protein folding independent of cofactor |
| <b>GO:0070271</b> | 0,001 | 1,813  | 30  | 45  | 173 | protein complex biogenesis                                 |
| <b>GO:0072521</b> | 0,001 | 2,17   | 15  | 27  | 90  | purine-containing compound metabolic process               |
| <b>GO:0006413</b> | 0,002 | 3,233  | 6   | 13  | 33  | translational initiation                                   |
| <b>GO:0044248</b> | 0,002 | 1,649  | 41  | 58  | 241 | cellular catabolic process                                 |
| <b>GO:0009124</b> | 0,002 | 3,636  | 4   | 11  | 26  | nucleoside monophosphate biosynthetic process              |
| <b>GO:0009117</b> | 0,002 | 1,96   | 20  | 32  | 115 | nucleotide metabolic process                               |
| <b>GO:0051533</b> | 0,002 | 12,264 | 1   | 5   | 7   | positive regulation of NFAT protein import into nucleus    |
| <b>GO:0048610</b> | 0,002 | 2,054  | 17  | 28  | 97  | cellular process involved in reproduction                  |
| <b>GO:0016044</b> | 0,002 | 1,666  | 38  | 54  | 222 | cellular membrane organization                             |
| <b>GO:0008064</b> | 0,002 | 3,31   | 5   | 12  | 30  | regulation of actin polymerization or depolymerization     |
| <b>GO:0000279</b> | 0,002 | 1,813  | 26  | 39  | 149 | M phase                                                    |
| <b>GO:0006974</b> | 0,003 | 2,1    | 15  | 25  | 85  | response to DNA damage stimulus                            |
| <b>GO:0044267</b> | 0,003 | 1,529  | 61  | 79  | 385 | cellular protein metabolic process                         |
| <b>GO:0016192</b> | 0,003 | 1,604  | 43  | 59  | 250 | vesicle-mediated transport                                 |
| <b>GO:0042981</b> | 0,003 | 1,723  | 30  | 44  | 175 | regulation of apoptosis                                    |
| <b>GO:0001821</b> | 0,004 | 19,574 | 1   | 4   | 5   | histamine secretion                                        |
| <b>GO:0002349</b> | 0,004 | 19,574 | 1   | 4   | 5   | histamine production involved in inflammatory response     |
| <b>GO:0002553</b> | 0,004 | 19,574 | 1   | 4   | 5   | histamine secretion by mast cell                           |
| <b>GO:0008633</b> | 0,004 | 19,574 | 1   | 4   | 5   | activation of pro-apoptotic gene products                  |
| <b>GO:0035094</b> | 0,004 | 19,574 | 1   | 4   | 5   | response to nicotine                                       |
| <b>GO:0035308</b> | 0,004 | 19,574 | 1   | 4   | 5   | negative regulation of protein dephosphorylation           |
| <b>GO:0046822</b> | 0,004 | 3,533  | 4   | 10  | 24  | regulation of nucleocytoplasmic transport                  |
| <b>GO:0006164</b> | 0,004 | 2,367  | 10  | 18  | 56  | purine nucleotide biosynthetic process                     |
| <b>GO:0010941</b> | 0,004 | 1,684  | 31  | 45  | 182 | regulation of cell death                                   |
| <b>GO:0034621</b> | 0,004 | 1,684  | 31  | 45  | 182 | cellular macromolecular complex subunit organization       |

|                   |       |       |     |     |     |                                                          |
|-------------------|-------|-------|-----|-----|-----|----------------------------------------------------------|
| <b>GO:0007010</b> | 0,004 | 1,663 | 33  | 47  | 197 | cytoskeleton organization                                |
| <b>GO:0033043</b> | 0,004 | 2,101 | 13  | 23  | 78  | regulation of organelle organization                     |
| <b>GO:0034654</b> | 0,004 | 2,122 | 13  | 22  | 74  | nucleobase-containing biosynthetic process               |
| <b>GO:0046686</b> | 0,004 | 2,975 | 5   | 12  | 32  | response to cadmium ion                                  |
| <b>GO:0009161</b> | 0,005 | 4,921 | 2   | 7   | 14  | ribonucleoside monophosphate metabolic process           |
| <b>GO:0031109</b> | 0,005 | 4,921 | 2   | 7   | 14  | microtubule polymerization or depolymerization           |
| <b>GO:0051494</b> | 0,005 | 5,985 | 2   | 6   | 11  | negative regulation of cytoskeleton organization         |
| <b>GO:0006183</b> | 0,005 | Inf   | 1   | 3   | 3   | GTP biosynthetic process                                 |
| <b>GO:0009220</b> | 0,005 | Inf   | 1   | 3   | 3   | pyrimidine ribonucleotide biosynthetic process           |
| <b>GO:0045138</b> | 0,005 | Inf   | 1   | 3   | 3   | tail tip morphogenesis                                   |
| <b>GO:0048566</b> | 0,005 | Inf   | 1   | 3   | 3   | embryonic digestive tract development                    |
| <b>GO:0021761</b> | 0,005 | 8,171 | 1   | 5   | 8   | limbic system development                                |
| <b>GO:0007052</b> | 0,005 | 2,009 | 14  | 24  | 84  | mitotic spindle organization                             |
| <b>GO:0043624</b> | 0,005 | 3,295 | 4   | 10  | 25  | cellular protein complex disassembly                     |
| <b>GO:0030041</b> | 0,006 | 4,003 | 3   | 8   | 18  | actin filament polymerization                            |
| <b>GO:0010035</b> | 0,006 | 1,799 | 21  | 32  | 122 | response to inorganic substance                          |
| <b>GO:0051234</b> | 0,006 | 1,395 | 100 | 120 | 585 | establishment of localization                            |
| <b>GO:0009119</b> | 0,006 | 3,942 | 3   | 8   | 18  | ribonucleoside metabolic process                         |
| <b>GO:0031333</b> | 0,006 | 3,942 | 3   | 8   | 18  | negative regulation of protein complex assembly          |
| <b>GO:0018130</b> | 0,006 | 1,975 | 15  | 24  | 85  | heterocycle biosynthetic process                         |
| <b>GO:0009150</b> | 0,007 | 2,156 | 11  | 19  | 63  | purine ribonucleotide metabolic process                  |
| <b>GO:0006006</b> | 0,007 | 2,342 | 9   | 16  | 50  | glucose metabolic process                                |
| <b>GO:0008360</b> | 0,007 | 3,415 | 4   | 9   | 22  | regulation of cell shape                                 |
| <b>GO:0009314</b> | 0,007 | 2,405 | 8   | 15  | 46  | response to radiation                                    |
| <b>GO:0007030</b> | 0,007 | 4,303 | 3   | 7   | 15  | Golgi organization                                       |
| <b>GO:0042990</b> | 0,007 | 4,303 | 3   | 7   | 15  | regulation of transcription factor import into nucleus   |
| <b>GO:0051650</b> | 0,007 | 4,303 | 3   | 7   | 15  | establishment of vesicle localization                    |
| <b>GO:0032984</b> | 0,008 | 3,087 | 4   | 10  | 26  | macromolecular complex disassembly                       |
| <b>GO:0043627</b> | 0,008 | 2,863 | 5   | 11  | 30  | response to estrogen stimulus                            |
| <b>GO:0043623</b> | 0,008 | 1,989 | 13  | 22  | 78  | cellular protein complex assembly                        |
| <b>GO:0007017</b> | 0,008 | 1,675 | 26  | 37  | 149 | microtubule-based process                                |
| <b>GO:0009260</b> | 0,009 | 2,419 | 7   | 14  | 43  | ribonucleotide biosynthetic process                      |
| <b>GO:0051707</b> | 0,009 | 1,966 | 13  | 22  | 78  | response to other organism                               |
| <b>GO:0009168</b> | 0,009 | 4,909 | 2   | 6   | 12  | purine ribonucleoside monophosphate biosynthetic process |
| <b>GO:0030837</b> | 0,009 | 4,909 | 2   | 6   | 12  | negative regulation of actin filament polymerization     |
| <b>GO:0080090</b> | 0,009 | 1,596 | 32  | 44  | 201 | regulation of primary metabolic process                  |
| <b>GO:0048513</b> | 0,009 | 1,393 | 81  | 98  | 470 | organ development                                        |
| <b>GO:0050793</b> | 0,009 | 1,672 | 25  | 36  | 145 | regulation of developmental process                      |
| <b>GO:0009408</b> | 0,009 | 2,395 | 7   | 14  | 43  | response to heat                                         |
| <b>GO:0006000</b> | 0,01  | 9,781 | 1   | 4   | 6   | fructose metabolic process                               |
| <b>GO:0007021</b> | 0,01  | 9,781 | 1   | 4   | 6   | tubulin complex assembly                                 |
| <b>GO:0030435</b> | 0,01  | 9,781 | 1   | 4   | 6   | sporulation resulting in formation of a cellular spore   |
| <b>GO:0051220</b> | 0,01  | 9,781 | 1   | 4   | 6   | cytoplasmic sequestering of protein                      |
| <b>GO:0032535</b> | 0,01  | 2,477 | 7   | 13  | 39  | regulation of cellular component size                    |
| <b>GO:0006733</b> | 0,01  | 3,169 | 4   | 9   | 23  | oxidoreduction coenzyme metabolic process                |

|            |      |       |   |   |    |                                                     |
|------------|------|-------|---|---|----|-----------------------------------------------------|
| GO:0046496 | 0,01 | 3,169 | 4 | 9 | 23 | nicotinamide nucleotide metabolic process           |
| GO:0072524 | 0,01 | 3,169 | 4 | 9 | 23 | pyridine-containing compound metabolic process      |
| GO:0002275 | 0,01 | 6,124 | 2 | 5 | 9  | myeloid cell activation involved in immune response |
| GO:0002444 | 0,01 | 6,124 | 2 | 5 | 9  | myeloid leukocyte mediated immunity                 |
| GO:0043299 | 0,01 | 6,124 | 2 | 5 | 9  | leukocyte degranulation                             |
| GO:0048205 | 0,01 | 6,124 | 2 | 5 | 9  | COPI coating of Golgi vesicle                       |

### Genes in cluster:

| Entrez Id | Symbol    | description                                                                                          |
|-----------|-----------|------------------------------------------------------------------------------------------------------|
| 474393    | DGKA      | diacylglycerol kinase, alpha 80kDa                                                                   |
| 612760    | PTGES3    | prostaglandin E synthase 3 (cytosolic)                                                               |
| 476200    | RNMT      | RNA (guanine-7-) methyltransferase                                                                   |
| 474414    | MARS      | methionyl-tRNA synthetase                                                                            |
| 474415    | DCTN2     | dynactin 2 (p50)                                                                                     |
| 474437    | CAND1     | cullin-associated and neddylation-dissociated 1                                                      |
| 474441    | CPSF6     | cleavage and polyadenylation specific factor 6, 68kDa                                                |
| 474445    | CCT2      | chaperonin containing TCP1, subunit 2 (beta)                                                         |
| 474839    | DDX39B    | DEAD (Asp-Glu-Ala-Asp) box polypeptide 39B                                                           |
| 474840    | ATP6V1G2  | ATPase, H+ transporting, lysosomal 13kDa, V1 subunit G2                                              |
| 474657    | SNX2      | sorting nexin 2                                                                                      |
| 474842    | BAG6      | BCL2-associated athanogene 6                                                                         |
| 475864    | YWHAZ     | tyrosine 3-monooxygenase/tryptophan 5-monooxygenase activation protein, zeta polypeptide             |
| 403612    | HSP70     | heat shock protein 70                                                                                |
| 475070    | EIF3E     | eukaryotic translation initiation factor 3, subunit E                                                |
| 484064    | TCP1      | t-complex 1                                                                                          |
| 608479    | LOC608479 | similar to Glyceraldehyde-3-phosphate dehydrogenase (GAPDH)                                          |
| 474667    | HINT1     | histidine triad nucleotide binding protein 1                                                         |
| 474474    | TTL12     | tubulin tyrosine ligase-like family, member 12                                                       |
| 474680    | HSPA4     | heat shock 70kDa protein 4                                                                           |
| 474682    | SKP1      | S-phase kinase-associated protein 1                                                                  |
| 403608    | PPP2CA    | protein phosphatase 2, catalytic subunit, alpha isozyme                                              |
| 474685    | DDX46     | DEAD (Asp-Glu-Ala-Asp) box polypeptide 46                                                            |
| 483608    | LOC483608 | similar to heat shock 70kD protein binding protein                                                   |
| 474499    | ADSL      | adenylosuccinate lyase                                                                               |
| 442946    | HMGA1     | high mobility group AT-hook 1                                                                        |
| 475115    | EEF1D     | eukaryotic translation elongation factor 1 delta (guanine nucleotide exchange protein)               |
| 476309    | HNRNPK    | heterogeneous nuclear ribonucleoprotein K                                                            |
| 476312    | UBQLN1    | ubiquilin 1                                                                                          |
| 474513    | LOC474513 | similar to eukaryotic translation initiation factor 3 subunit 6 interacting protein                  |
| 482263    | TNPO3     | transportin 3                                                                                        |
| 608665    | EIF3D     | eukaryotic translation initiation factor 3, subunit D                                                |
| 475132    | PSMA4     | proteasome (prosome, macropain) subunit, alpha type, 4                                               |
| 476322    | ANXA1     | annexin A1                                                                                           |
| 476323    | ALDH1A1   | aldehyde dehydrogenase 1 family, member A1                                                           |
| 475220    | SRI       | sorcin                                                                                               |
| 481590    | VCP       | valosin containing protein                                                                           |
| 474919    | HSP90AB1  | heat shock protein 90kDa alpha (cytosolic), class B member 1                                         |
| 475240    | ASNS      | asparagine synthetase (glutamine-hydrolyzing)                                                        |
| 475150    | PAICS     | phosphoribosylaminoimidazole carboxylase, phosphoribosylaminoimidazole succinocarboxamide synthetase |

|        |           |                                                                                |
|--------|-----------|--------------------------------------------------------------------------------|
| 609822 | GCLC      | glutamate-cysteine ligase, catalytic subunit                                   |
| 484221 | UBE2M     | ubiquitin-conjugating enzyme E2M                                               |
| 475250 | BZW2      | basic leucine zipper and W2 domains 2                                          |
| 474584 | CALM2     | calmodulin 2 (phosphorylase kinase, delta)                                     |
| 403506 | EEF1A1    | eukaryotic translation elongation factor 1 alpha 1                             |
| 474585 | MSH6      | mutS homolog 6 (E. coli)                                                       |
| 403743 | SPTBN1    | spectrin, beta, non-erythrocytic 1                                             |
| 476400 | ETFB      | electron-transfer-flavoprotein, beta polypeptide                               |
| 607412 | DBNL      | drebrin-like                                                                   |
| 475260 | HNRNPA2B1 | heterogeneous nuclear ribonucleoprotein A2/B1                                  |
| 482015 | CBX3      | chromobox homolog 3                                                            |
| 475317 | CAP1      | CAP, adenylate cyclase-associated protein 1 (yeast)                            |
| 482271 | CCT4      | chaperonin containing TCP1, subunit 4 (delta)                                  |
| 475268 | GARS      | glycyl-tRNA synthetase                                                         |
| 474614 | MDH1      | malate dehydrogenase 1, NAD (soluble)                                          |
| 475326 | SF3A3     | splicing factor 3a, subunit 3, 60kDa                                           |
| 478521 | LOC478521 | similar to 14-3-3 protein theta (14-3-3 protein tau)                           |
| 482476 | THRAP3    | thyroid hormone receptor associated protein 3                                  |
| 484370 | NUP62     | nucleoporin 62kDa                                                              |
| 475870 | PSMA2     | proteasome (prosome, macropain) subunit, alpha type, 2                         |
| 475338 | PSMB2     | proteasome (prosome, macropain) subunit, beta type, 2                          |
| 475346 | VPS35     | vacuolar protein sorting 35 homolog (S. cerevisiae)                            |
| 476418 | RUVBL2    | RuvB-like 2 (E. coli)                                                          |
| 475035 | HDAC2     | histone deacetylase 2                                                          |
| 475529 | LUC7L2    | LUC7-like 2 (S. cerevisiae)                                                    |
| 475040 | PSMB1     | proteasome (prosome, macropain) subunit, beta type, 1                          |
| 476512 | RUVBL1    | RuvB-like 1 (E. coli)                                                          |
| 476517 | COPG      | coatomer protein complex, subunit gamma                                        |
| 476909 | KPNA3     | karyopherin alpha 3 (importin alpha 4)                                         |
| 403936 | VASP      | vasodilator-stimulated phosphoprotein                                          |
| 475373 | NASP      | nuclear autoantigenic sperm protein (histone-binding)                          |
| 477991 | VIM       | vimentin                                                                       |
| 476924 | TPT1      | tumor protein, translationally-controlled 1                                    |
| 483299 | SLC9A3R1  | solute carrier family 9 (sodium/hydrogen exchanger), member 3 regulator 1      |
| 477999 | SEPHS1    | selenophosphate synthetase 1                                                   |
| 483312 | GRB2      | growth factor receptor-bound protein 2                                         |
| 477951 | LOC477951 | similar to suppressor of G2 allele of SKP1                                     |
| 476115 | DBI       | diazepam binding inhibitor (GABA receptor modulator, acyl-CoA binding protein) |
| 475703 | PPM1G     | protein phosphatase, Mg <sup>2+</sup> /Mn <sup>2+</sup> dependent, 1G          |
| 403702 | ACTR3     | ARP3 actin-related protein 3 homolog (yeast)                                   |
| 476454 | SNRPA     | small nuclear ribonucleoprotein polypeptide A                                  |
| 476132 | DARS      | aspartyl-tRNA synthetase                                                       |
| 483339 | SEPT9     | septin 9                                                                       |
| 403818 | GDI2      | GDP dissociation inhibitor 2                                                   |
| 475391 | EBNA1BP2  | EBNA1 binding protein 2                                                        |
| 482558 | APEX1     | APEX nuclease (multifunctional DNA repair enzyme) 1                            |
| 475393 | PNP       | purine nucleoside phosphorylase                                                |
| 478019 | PFKP      | phosphofructokinase, platelet                                                  |
| 476462 | SUPT5H    | suppressor of Ty 5 homolog (S. cerevisiae)                                     |
| 403809 | RRBP1     | ribosome binding protein 1 homolog 180kDa (dog)                                |
| 485528 | IPO5      | importin 5                                                                     |
| 475715 | DPY30     | dpy-30 homolog (C. elegans)                                                    |
| 403580 | ACTB      | actin, beta                                                                    |
| 484526 | ACTN4     | actinin, alpha 4                                                               |

|        |           |                                                                                                                         |
|--------|-----------|-------------------------------------------------------------------------------------------------------------------------|
| 476468 | EIF3K     | eukaryotic translation initiation factor 3, subunit K                                                                   |
| 475924 | ARHGDI A  | Rho GDP dissociation inhibitor (GDI) alpha                                                                              |
| 475926 | DCXR      | dicarbonyl/L-xylulose reductase                                                                                         |
| 483378 | FASN      | fatty acid synthase                                                                                                     |
| 477166 | PCNA      | proliferating cell nuclear antigen                                                                                      |
| 476784 | LOC476784 | similar to ubiquitin-conjugating enzyme E2N                                                                             |
| 475934 | PSMD13    | proteasome (prosome, macropain) 26S subunit, non-ATPase, 13                                                             |
| 483048 | EML4      | echinoderm microtubule associated protein like 4                                                                        |
| 607013 | LOC607013 | similar to Coatomer zeta-1 subunit (Zeta-1 coat protein) (Zeta-1 COP)                                                   |
| 477322 | HSPH1     | heat shock 105kDa/110kDa protein 1                                                                                      |
| 475937 | TALDO1    | transaldolase 1                                                                                                         |
| 477177 | IDH3B     | isocitrate dehydrogenase 3 (NAD+) beta                                                                                  |
| 442976 | RAN       | RAN, member RAS oncogene family                                                                                         |
| 483413 | API5      | apoptosis inhibitor 5                                                                                                   |
| 607950 | SKIV2L2   | superkiller viralicidic activity 2-like 2 ( <i>S. cerevisiae</i> )                                                      |
| 608575 | COMM D9   | COMM domain containing 9                                                                                                |
| 484700 | PSMD6     | proteasome (prosome, macropain) 26S subunit, non-ATPase, 6                                                              |
| 476840 | LOC476840 | similar to eukaryotic translation initiation factor 3, subunit 5 epsilon, 47kDa                                         |
| 486953 | ATP6V1H   | ATPase, H+ transporting, lysosomal 50/57kDa, V1 subunit H                                                               |
| 477600 | EIF4B     | eukaryotic translation initiation factor 4B                                                                             |
| 486788 | IFIT5     | interferon-induced protein with tetratricopeptide repeats 5                                                             |
| 475208 | LOC475208 | similar to Microtubule-associated protein RP/EB family member 1 (APC-binding protein EB1) (End-binding protein 1) (EB1) |
| 475950 | EIF3M     | eukaryotic translation initiation factor 3, subunit M                                                                   |
| 477768 | IDE       | insulin-degrading enzyme                                                                                                |
| 477449 | RILPL1    | Rab interacting lysosomal protein-like 1                                                                                |
| 477198 | AHCY      | adenosylhomocysteinase                                                                                                  |
| 490977 | KRT17     | keratin 17                                                                                                              |
| 484713 | FLNB      | filamin B, beta                                                                                                         |
| 476854 | EIF4G2    | eukaryotic translation initiation factor 4 gamma, 2                                                                     |
| 475767 | USP39     | ubiquitin specific peptidase 39                                                                                         |
| 612329 | LSM6      | LSM6 homolog, U6 small nuclear RNA associated ( <i>S. cerevisiae</i> )                                                  |
| 475770 | MAT2A     | methionine adenosyltransferase II, alpha                                                                                |
| 483082 | CAPG      | capping protein (actin filament), gelsolin-like                                                                         |
| 475968 | TIMM10    | translocase of inner mitochondrial membrane 10 homolog (yeast)                                                          |
| 479148 | CAST      | calpastatin                                                                                                             |
| 613005 | LOC613005 | similar to thymosin, beta 10                                                                                            |
| 477463 | DIABLO    | diablo, IAP-binding mitochondrial protein                                                                               |
| 478093 | TNPO1     | transportin 1                                                                                                           |
| 477914 | TCEB1     | transcription elongation factor B (SIII), polypeptide 1 (15kDa, elongin C)                                              |
| 476719 | LOC476719 | similar to Fructose-bisphosphate aldolase A (Muscle-type aldolase) (Lung cancer antigen NY-LU-1)                        |
| 477216 | RBM39     | RNA binding motif protein 39                                                                                            |
| 478429 | G3BP2     | GTPase activating protein (SH3 domain) binding protein 2                                                                |
| 476866 | COPB1     | coatomer protein complex, subunit beta 1                                                                                |
| 478430 | USO1      | USO1 vesicle docking protein homolog (yeast)                                                                            |
| 477474 | ARPC3     | actin related protein 2/3 complex, subunit 3, 21kDa                                                                     |
| 476867 | PSMA1     | proteasome (prosome, macropain) subunit, alpha type, 1                                                                  |
| 477477 | VPS29     | vacuolar protein sorting 29 homolog ( <i>S. cerevisiae</i> )                                                            |
| 477116 | MBNL1     | muscleblind-like ( <i>Drosophila</i> )                                                                                  |
| 476588 | TKT       | transketolase                                                                                                           |
| 478399 | CCT8      | chaperonin containing TCP1, subunit 8 (theta)                                                                           |
| 475481 | PPID      | peptidylprolyl isomerase D                                                                                              |
| 475980 | PSMC3     | proteasome (prosome, macropain) 26S subunit, ATPase, 3                                                                  |
| 474591 | ARF1      | ADP-ribosylation factor 1                                                                                               |

|        |           |                                                                                                                            |
|--------|-----------|----------------------------------------------------------------------------------------------------------------------------|
| 477123 | GMPS      | guanine monphosphate synthetase                                                                                            |
| 478447 | ANXA3     | annexin A3                                                                                                                 |
| 477786 | PGAM1     | phosphoglycerate mutase 1 (brain)                                                                                          |
| 478119 | NUP93     | nucleoporin 93kDa                                                                                                          |
| 478406 | SON       | SON DNA binding protein                                                                                                    |
| 487948 | LOC487948 | similar to coproporphyrinogen oxidase                                                                                      |
| 476882 | LDHA      | lactate dehydrogenase A                                                                                                    |
| 487740 | GART      | phosphoribosylglycinamide formyltransferase, phosphoribosylglycinamide synthetase, phosphoribosylaminoimidazole synthetase |
| 488192 | SERPINB9  | serpin peptidase inhibitor, clade B (ovalbumin), member 9                                                                  |
| 486122 | LOC486122 | similar to p30 DBC protein                                                                                                 |
| 487954 | TFG       | TRK-fused gene                                                                                                             |
| 477237 | YWHAB     | tyrosine 3-monooxygenase/tryptophan 5-monooxygenase activation protein, beta polypeptide                                   |
| 478717 | EEF1E1    | eukaryotic translation elongation factor 1 epsilon 1                                                                       |
| 486600 | TWF1      | twinfilin, actin-binding protein, homolog 1 (Drosophila)                                                                   |
| 478765 | PSMD14    | proteasome (prosome, macropain) 26S subunit, non-ATPase, 14                                                                |
| 483662 | CTSD      | cathepsin D                                                                                                                |
| 609496 | NOLC1     | nucleolar and coiled-body phosphoprotein 1                                                                                 |
| 607890 | LOC607890 | similar to D-3-phosphoglycerate dehydrogenase (3-PGDH)                                                                     |
| 606873 | CCT5      | chaperonin containing TCP1, subunit 5 (epsilon)                                                                            |
| 486137 | ATP6V1B2  | ATPase, H <sup>+</sup> transporting, lysosomal 56/58kDa, V1 subunit B2                                                     |
| 606787 | LOC606787 | similar to T-complex protein 1, zeta subunit (TCP-1-zeta) (CCT-zeta) (CCT-zeta-1)                                          |
| 403791 | ACTR1A    | ARP1 actin-related protein 1 homolog A, centractin alpha (yeast)                                                           |
| 483670 | NAP1L4    | nucleosome assembly protein 1-like 4                                                                                       |
| 609233 | LOC609233 | similar to dynein, cytoplasmic, light peptide                                                                              |
| 478145 | AK2       | adenylate kinase 2                                                                                                         |
| 610283 | CTTN      | cortactin                                                                                                                  |
| 478149 | RBBP4     | retinoblastoma binding protein 4                                                                                           |
| 478957 | TROVE2    | TROVE domain family, member 2                                                                                              |
| 607102 | SNRPA1    | small nuclear ribonucleoprotein polypeptide A'                                                                             |
| 478422 | U2AF1     | U2 small nuclear RNA auxiliary factor 1                                                                                    |
| 480004 | IPO9      | importin 9                                                                                                                 |
| 478152 | EIF3I     | eukaryotic translation initiation factor 3, subunit I                                                                      |
| 487981 | ATP6V1A   | ATPase, H <sup>+</sup> transporting, lysosomal 70kDa, V1 subunit A                                                         |
| 477403 | CAB39     | calcium binding protein 39                                                                                                 |
| 612989 | GLTP      | glycolipid transfer protein                                                                                                |
| 487316 | KHDRBS1   | KH domain containing, RNA binding, signal transduction associated 1                                                        |
| 478962 | EPRS      | glutamyl-prolyl-tRNA synthetase                                                                                            |
| 608525 | BPNT1     | 3'(2'), 5'-bisphosphate nucleotidase 1                                                                                     |
| 480459 | PRKAR1A   | protein kinase, cAMP-dependent, regulatory, type I, alpha (tissue specific extinguisher 1)                                 |
| 480246 | PSMB5     | proteasome (prosome, macropain) subunit, beta type, 5                                                                      |
| 480465 | PSMD12    | proteasome (prosome, macropain) 26S subunit, non-ATPase, 12                                                                |
| 490611 | PABPN1    | poly(A) binding protein, nuclear 1                                                                                         |
| 486633 | BCAT1     | branched chain amino-acid transaminase 1, cytosolic                                                                        |
| 476007 | CORO1B    | coronin, actin binding protein, 1B                                                                                         |
| 480469 | KPNA2     | karyopherin alpha 2 (RAG cohort 1, importin alpha 1)                                                                       |
| 403609 | PPP1CA    | protein phosphatase 1, catalytic subunit, alpha isozyme                                                                    |
| 479406 | HSPA8     | heat shock 70kDa protein 8                                                                                                 |
| 475834 | ANP32E    | acidic (leucine-rich) nuclear phosphoprotein 32 family, member E                                                           |
| 487332 | RCC1      | regulator of chromosome condensation 1                                                                                     |
| 610210 | TAGLN2    | transgelin 2                                                                                                               |
| 476628 | QARS      | glutaminyl-tRNA synthetase                                                                                                 |
| 478865 | BZW1      | basic leucine zipper and W2 domains 1                                                                                      |
| 476630 | IMPDH2    | IMP (inosine 5'-monophosphate) dehydrogenase 2                                                                             |
| 480258 | PSME2     | proteasome (prosome, macropain) activator subunit 2 (PA28 beta)                                                            |

|        |           |                                                                                                   |
|--------|-----------|---------------------------------------------------------------------------------------------------|
| 607749 | EIF4H     | eukaryotic translation initiation factor 4H                                                       |
| 486914 | EIF3A     | eukaryotic translation initiation factor 3, subunit A                                             |
| 484774 | PRKAR2A   | protein kinase, cAMP-dependent, regulatory, type II, alpha                                        |
| 488336 | cOR2W9    | cOR2W9 olfactory receptor family 2 subfamily W-like                                               |
| 487351 | SFN       | stratifin                                                                                         |
| 478593 | UMPS      | uridine monophosphate synthetase                                                                  |
| 610639 | RBM14     | RNA binding motif protein 14                                                                      |
| 478787 | SSB       | Sjogren syndrome antigen B (autoantigen La)                                                       |
| 404305 | PSMA7     | proteasome (prosome, macropain) subunit, alpha type, 7                                            |
| 479415 | ARCN1     | archain 1                                                                                         |
| 477284 | ADRM1     | adhesion regulating molecule 1                                                                    |
| 480854 | RBBP7     | retinoblastoma binding protein 7                                                                  |
| 475848 | PSMB4     | proteasome (prosome, macropain) subunit, beta type, 4                                             |
| 478175 | STMN1     | stathmin 1                                                                                        |
| 480479 | DDX42     | DEAD (Asp-Glu-Ala-Asp) box polypeptide 42                                                         |
| 487367 | CLIC4     | chloride intracellular channel 4                                                                  |
| 475852 | LOC475852 | similar to Calgizzarin (S100 calcium-binding protein A11) (S100C protein) (MLN 70)                |
| 478185 | SRRM1     | serine/arginine repetitive matrix 1                                                               |
| 487886 | SEPT2     | septin 2                                                                                          |
| 476015 | SF3B2     | splicing factor 3b, subunit 2, 145kDa                                                             |
| 476640 | SMARCC1   | SWI/SNF related, matrix associated, actin dependent regulator of chromatin, subfamily c, member 1 |
| 477691 | DDX47     | DEAD (Asp-Glu-Ala-Asp) box polypeptide 47                                                         |
| 479425 | PAFAH1B2  | platelet-activating factor acetylhydrolase 1b, catalytic subunit 2 (30kDa)                        |
| 477869 | GLRX3     | glutaredoxin 3                                                                                    |
| 480037 | ARPC5     | actin related protein 2/3 complex, subunit 5, 16kDa                                               |
| 478881 | EEF1B2    | eukaryotic translation elongation factor 1 beta 2                                                 |
| 480290 | PSMA6     | proteasome (prosome, macropain) subunit, alpha type, 6                                            |
| 475857 | CAPZA1    | capping protein (actin filament) muscle Z-line, alpha 1                                           |
| 608979 | UCK2      | uridine-cytidine kinase 2                                                                         |
| 490921 | NSF       | N-ethylmaleimide-sensitive factor                                                                 |
| 489818 | YWHAG     | tyrosine 3-monooxygenase/tryptophan 5-monooxygenase activation protein, gamma polypeptide         |
| 487532 | EIF3J     | eukaryotic translation initiation factor 3, subunit J                                             |
| 484785 | CCDC12    | coiled-coil domain containing 12                                                                  |
| 488118 | EIF4A2    | eukaryotic translation initiation factor 4A2                                                      |
| 480045 | TPR       | translocated promoter region (to activated MET oncogene)                                          |
| 479433 | ZW10      | ZW10, kinetochore associated, homolog (Drosophila)                                                |
| 480048 | PLA2G4A   | phospholipase A2, group IVA (cytosolic, calcium-dependent)                                        |
| 480295 | SEC23A    | Sec23 homolog A (S. cerevisiae)                                                                   |
| 481417 | PCBP1     | poly(rC) binding protein 1                                                                        |
| 479441 | CRYAB     | crystallin, alpha B                                                                               |
| 479068 | WDR61     | WD repeat domain 61                                                                               |
| 476031 | SF1       | splicing factor 1                                                                                 |
| 488513 | ATIC      | 5-aminoimidazole-4-carboxamide ribonucleotide formyltransferase/IMP cyclohydrolase                |
| 480062 | CACYBP    | calyculin binding protein                                                                         |
| 476033 | TRMT112   | tRNA methyltransferase 11-2 homolog (S. cerevisiae)                                               |
| 477711 | TPI1      | triosephosphate isomerase 1                                                                       |
| 474837 | STIP1     | stress-induced-phosphoprotein 1                                                                   |
| 480512 | PSME3     | proteasome (prosome, macropain) activator subunit 3 (PA28 gamma; Ki)                              |
| 476039 | OTUB1     | OTU domain, ubiquitin aldehyde binding 1                                                          |
| 478522 | PSMC6     | proteasome (prosome, macropain) 26S subunit, ATPase, 6                                            |
| 480896 | UBA1      | ubiquitin-like modifier activating enzyme 1                                                       |
| 403581 | PPIA      | peptidylprolyl isomerase A (cyclophilin A)                                                        |
| 480329 | MAPK11P1L | mitogen-activated protein kinase 1 interacting protein 1-like                                     |
| 404021 | LGALS3    | lectin, galactoside-binding, soluble, 3                                                           |

|        |           |                                                                                                                                         |
|--------|-----------|-----------------------------------------------------------------------------------------------------------------------------------------|
| 489861 | PDAP1     | PDGFA associated protein 1                                                                                                              |
| 478209 | CAPZB     | capping protein (actin filament) muscle Z-line, beta                                                                                    |
| 480338 | PSMA3     | proteasome (prosome, macropain) subunit, alpha type, 3                                                                                  |
| 478922 | DNPEP     | aspartyl aminopeptidase                                                                                                                 |
| 477575 | MAPK1     | mitogen-activated protein kinase 1                                                                                                      |
| 611070 | WDR1      | WD repeat domain 1                                                                                                                      |
| 477726 | FKBP4     | FK506 binding protein 4, 59kDa                                                                                                          |
| 477584 | ATAD1     | ATPase family, AAA domain containing 1                                                                                                  |
| 476055 | UBXN1     | UBX domain protein 1                                                                                                                    |
| 479259 | ANXA11    | annexin A11                                                                                                                             |
| 609879 | TPM4      | tropomyosin 4                                                                                                                           |
| 476570 | LOC476570 | similar to Elongation factor 1-gamma (EF-1-gamma) (eEF-1B gamma)                                                                        |
| 480352 | MTHFD1    | methylenetetrahydrofolate dehydrogenase (NADP+ dependent) 1, methenyltetrahydrofolate cyclohydrolase, formyltetrahydrofolate synthetase |
| 480921 | GSPT2     | G1 to S phase transition 2                                                                                                              |
| 477736 | LOC477736 | similar to cat eye syndrome chromosome region, candidate 5 isoform 2 precursor                                                          |
| 478926 | FARSB     | phenylalanyl-tRNA synthetase, beta subunit                                                                                              |
| 477740 | ATP6V1E1  | ATPase, H+ transporting, lysosomal 31kDa, V1 subunit E1                                                                                 |
| 476067 | DDB1      | damage-specific DNA binding protein 1, 127kDa                                                                                           |
| 491018 | PSMD3     | proteasome (prosome, macropain) 26S subunit, non-ATPase, 3                                                                              |
| 476689 | DDX39A    | DEAD (Asp-Glu-Ala-Asp) box polypeptide 39A                                                                                              |
| 480118 | CAPN2     | calpain 2, (m/II) large subunit                                                                                                         |
| 479766 | EIF3B     | eukaryotic translation initiation factor 3, subunit B                                                                                   |
| 611552 | PRPF19    | PRP19/PSO4 pre-mRNA processing factor 19 homolog (S. cerevisiae)                                                                        |
| 480369 | ACTN1     | actinin, alpha 1                                                                                                                        |
| 608624 | LASP1     | LIM and SH3 protein 1                                                                                                                   |
| 480371 | ERH       | enhancer of rudimentary homolog (Drosophila)                                                                                            |
| 474987 | LOC474987 | similar to Proteasome subunit beta type 3 (Proteasome theta chain) (Proteasome chain 13) (Proteasome component C10-II)                  |
| 479485 | EIF4A1    | eukaryotic translation initiation factor 4A1                                                                                            |
| 491042 | KPNB1     | karyopherin (importin) beta 1                                                                                                           |
| 612240 | CTBP1     | C-terminal binding protein 1                                                                                                            |
| 478236 | PGD       | phosphogluconate dehydrogenase                                                                                                          |
| 476790 | LOC476790 | similar to chaperonin containing TCP1, subunit 3 isoform c                                                                              |
| 479795 | EIF3C     | eukaryotic translation initiation factor 3, subunit C                                                                                   |
| 484926 | PRDX2     | peroxiredoxin 2                                                                                                                         |
| 480402 | AHSA1     | AHA1, activator of heat shock 90kDa protein ATPase homolog 1 (yeast)                                                                    |
| 480964 | PGK1      | phosphoglycerate kinase 1                                                                                                               |
| 478347 | MAP2K1    | mitogen-activated protein kinase kinase 1                                                                                               |
| 480559 | NME2      | non-metastatic cells 2, protein (NM23B) expressed in                                                                                    |
| 403534 | ANP32A    | acidic (leucine-rich) nuclear phosphoprotein 32 family, member A                                                                        |
| 480979 | HNRNPK    | heterogeneous nuclear ribonucleoprotein K                                                                                               |
| 478703 | PSMC1     | proteasome (prosome, macropain) 26S subunit, ATPase, 1                                                                                  |
| 480986 | TIMM8A    | translocase of inner mitochondrial membrane 8 homolog A (yeast)                                                                         |
| 489167 | LOC489167 | similar to CG9590-PA                                                                                                                    |
| 403874 | PKM2      | pyruvate kinase, muscle                                                                                                                 |
| 480151 | LOC480151 | similar to CG14299-PA, isoform A                                                                                                        |
| 480989 | HNRNPH2   | heterogeneous nuclear ribonucleoprotein H2 (H')                                                                                         |
| 484955 | CDC37     | cell division cycle 37 homolog (S. cerevisiae)                                                                                          |
| 480595 | AATF      | apoptosis antagonizing transcription factor                                                                                             |
| 612971 | EIF3G     | eukaryotic translation initiation factor 3, subunit G                                                                                   |
| 480437 | LOC480437 | similar to dynein, cytoplasmic, heavy polypeptide 1                                                                                     |
| 491130 | ACACA     | acetyl-CoA carboxylase alpha                                                                                                            |
| 491146 | CCT6B     | chaperonin containing TCP1, subunit 6B (zeta 2)                                                                                         |
| 480182 | USP14     | ubiquitin specific peptidase 14 (tRNA-guanine transglycosylase)                                                                         |



|               |           |                                                                                             |
|---------------|-----------|---------------------------------------------------------------------------------------------|
| <b>480610</b> | PSMD11    | proteasome (prosome, macropain) 26S subunit, non-ATPase, 11                                 |
| <b>479528</b> | COPS3     | COP9 constitutive photomorphogenic homolog subunit 3 (Arabidopsis)                          |
| <b>476725</b> | HNRNPM    | heterogeneous nuclear ribonucleoprotein M                                                   |
| <b>479344</b> | HMGCS1    | 3-hydroxy-3-methylglutaryl-CoA synthase 1 (soluble)                                         |
| <b>485022</b> | KHSRP     | KH-type splicing regulatory protein                                                         |
| <b>480622</b> | ALDOC     | aldolase C, fructose-bisphosphate                                                           |
| <b>479846</b> | GSPT1     | G1 to S phase transition 1                                                                  |
| <b>480631</b> | NUFIP2    | nuclear fragile X mental retardation protein interacting protein 2                          |
| <b>481063</b> | RBMX      | RNA binding motif protein, X-linked                                                         |
| <b>480645</b> | YWHAE     | tyrosine 3-monooxygenase/tryptophan 5-monooxygenase activation protein, epsilon polypeptide |
| <b>476744</b> | EEF2      | eukaryotic translation elongation factor 2                                                  |
| <b>491201</b> | LOC491201 | similar to CG7338-PA                                                                        |
| <b>609638</b> | SRRM2     | serine/arginine repetitive matrix 2                                                         |
| <b>479575</b> | ISG15     | ISG15 ubiquitin-like modifier                                                               |
| <b>479873</b> | TCEB2     | transcription elongation factor B (SIII), polypeptide 2 (18kDa, elongin B)                  |
| <b>612188</b> | SF3A2     | splicing factor 3a, subunit 2, 66kDa                                                        |
| <b>611128</b> | HN1L      | hematological and neurological expressed 1-like                                             |
| <b>403819</b> | GDI1      | GDP dissociation inhibitor 1                                                                |
| <b>479597</b> | ENO1      | enolase 1, (alpha)                                                                          |
| <b>490123</b> | PSMA5     | proteasome (prosome, macropain) subunit, alpha type, 5                                      |
| <b>479625</b> | USP10     | ubiquitin specific peptidase 10                                                             |
| <b>403484</b> | SPTAN1    | spectrin, alpha, non-erythrocytic 1 (alpha-fodrin)                                          |
| <b>479644</b> | KARS      | lysyl-tRNA synthetase                                                                       |
| <b>612856</b> | ARPC5L    | actin related protein 2/3 complex, subunit 5-like                                           |
| <b>479671</b> | PSMD7     | proteasome (prosome, macropain) 26S subunit, non-ATPase, 7                                  |
| <b>490201</b> | FUBP1     | far upstream element (FUSE) binding protein 1                                               |
| <b>476166</b> | CNDP2     | CNDP dipeptidase 2 (metallopeptidase M20 family)                                            |
| <b>476767</b> | NME1      | non-metastatic cells 1, protein (NM23A) expressed in                                        |
| <b>476540</b> | ARPC4     | actin related protein 2/3 complex, subunit 4, 20kDa                                         |
| <b>478680</b> | KPNA4     | karyopherin alpha 4 (importin alpha 3)                                                      |
| <b>488473</b> | CASP8     | caspase 8, apoptosis-related cysteine peptidase                                             |
| <b>477928</b> | CA2       | carbonic anhydrase II                                                                       |

## Cluster 3

### Enriched Terms:

| Gene to GO BP<br>Conditional test<br>for over-<br>representation<br>GOBPID | Pvalue | OddsRatio | ExpCount | Count | Size | Term                                                |
|----------------------------------------------------------------------------|--------|-----------|----------|-------|------|-----------------------------------------------------|
| GO:0006414                                                                 | 0      | 4,073     | 5        | 16    | 79   | translational elongation                            |
| GO:0006270                                                                 | 0      | 29,847    | 0        | 4     | 6    | DNA-dependent DNA replication initiation            |
| GO:0000003                                                                 | 0,001  | 1,955     | 28       | 43    | 427  | reproduction                                        |
| GO:0042303                                                                 | 0,001  | 4,306     | 3        | 9     | 42   | molting cycle                                       |
| GO:0018996                                                                 | 0,001  | 4,175     | 3        | 9     | 42   | molting cycle, collagen and cuticulin-based cuticle |
| GO:0010467                                                                 | 0,001  | 1,814     | 36       | 51    | 551  | gene expression                                     |
| GO:0006892                                                                 | 0,002  | 5,648     | 1        | 6     | 22   | post-Golgi vesicle-mediated transport               |
| GO:0042274                                                                 | 0,002  | 5,648     | 1        | 6     | 22   | ribosomal small subunit biogenesis                  |
| GO:0009059                                                                 | 0,003  | 1,813     | 25       | 38    | 390  | macromolecule biosynthetic process                  |
| GO:0033572                                                                 | 0,004  | Inf       | 0        | 2     | 2    | transferrin transport                               |
| GO:0051304                                                                 | 0,004  | Inf       | 0        | 2     | 2    | chromosome separation                               |
| GO:0007017                                                                 | 0,006  | 2,156     | 10       | 18    | 149  | microtubule-based process                           |
| GO:0030855                                                                 | 0,008  | 4,093     | 2        | 6     | 28   | epithelial cell differentiation                     |
| GO:0022404                                                                 | 0,008  | 6,606     | 1        | 4     | 13   | molting cycle process                               |
| GO:0033205                                                                 | 0,008  | 11,086    | 0        | 3     | 7    | cell cycle cytokinesis                              |
| GO:0035017                                                                 | 0,008  | 11,086    | 0        | 3     | 7    | cuticle pattern formation                           |

### Genes in cluster:

| Entrez Id | Symbol    | description                                                                                                        |
|-----------|-----------|--------------------------------------------------------------------------------------------------------------------|
| 474396    | PA2G4     | proliferation-associated 2G4, 38kDa                                                                                |
| 607631    | NARS      | asparaginyl-tRNA synthetase                                                                                        |
| 474408    | NACA      | nascent polypeptide-associated complex alpha subunit                                                               |
| 476206    | RPS12     | ribosomal protein S12                                                                                              |
| 474826    | ABCF1     | ATP-binding cassette, sub-family F (GCN20), member 1                                                               |
| 474663    | LMNB1     | lamin B1                                                                                                           |
| 474696    | LOC474696 | similar to eukaryotic translation termination factor 1 (predicted)                                                 |
| 474508    | DDX17     | DEAD (Asp-Glu-Ala-Asp) box polypeptide 17                                                                          |
| 482083    | PLEC      | plectin                                                                                                            |
| 474519    | TXN2      | thioredoxin 2                                                                                                      |
| 474722    | RPS6      | ribosomal protein S6                                                                                               |
| 475199    | ATP6V1F   | ATPase, H+ transporting, lysosomal 14kDa, V1 subunit F                                                             |
| 481280    | MYH9      | myosin, heavy chain 9, non-muscle                                                                                  |
| 475204    | SND1      | staphylococcal nuclease and tudor domain containing 1                                                              |
| 610519    | MCM5      | minichromosome maintenance complex component 5                                                                     |
| 474576    | LOC474576 | similar to DnaJ homolog subfamily A member 1 (Heat shock 40 kDa protein 4) (DnaJ protein homolog 2) (HSJ-2) (HSDJ) |
| 474740    | SMU1      | smu-1 suppressor of mec-8 and unc-52 homolog (C. elegans)                                                          |
| 481839    | MCM3      | minichromosome maintenance complex component 3                                                                     |
| 403944    | SRP72     | signal recognition particle 72kDa                                                                                  |
| 474556    | EIF5B     | eukaryotic translation initiation factor 5B                                                                        |
| 474765    | CLTA      | clathrin, light chain A                                                                                            |
| 476378    | RPL28     | ribosomal protein L28                                                                                              |

|        |           |                                                                                                                                     |
|--------|-----------|-------------------------------------------------------------------------------------------------------------------------------------|
| 475321 | MACF1     | microtubule-actin crosslinking factor 1                                                                                             |
| 475649 | RPS7      | ribosomal protein S7                                                                                                                |
| 482963 | RRM2      | ribonucleotide reductase M2                                                                                                         |
| 476411 | PRMT1     | protein arginine methyltransferase 1                                                                                                |
| 475671 | DDX1      | DEAD (Asp-Glu-Ala-Asp) box polypeptide 1                                                                                            |
| 475682 | LOC475682 | similar to splicing factor 3B, 14 kDa subunit                                                                                       |
| 612058 | GRWD1     | glutamate-rich WD repeat containing 1                                                                                               |
| 484622 | MCM2      | minichromosome maintenance complex component 2                                                                                      |
| 477968 | KIF5B     | kinesin family member 5B                                                                                                            |
| 476111 | MKI67IP   | MKI67 (FHA domain) interacting nucleolar phosphoprotein                                                                             |
| 483009 | CAD       | carbamoyl-phosphate synthetase 2, aspartate transcarbamylase, and dihydroorotase                                                    |
| 475540 | LOC475540 | similar to testis-specific histone 2b                                                                                               |
| 403952 | SRP68     | signal recognition particle 68kDa                                                                                                   |
| 477029 | RPSA      | ribosomal protein SA                                                                                                                |
| 607653 | SEC13     | SEC13 homolog ( <i>S. cerevisiae</i> )                                                                                              |
| 476460 | FBL       | fibrillarlin                                                                                                                        |
| 474964 | HNRNPCL1  | heterogeneous nuclear ribonucleoprotein C-like 1                                                                                    |
| 475719 | TTC27     | tetratricopeptide repeat domain 27                                                                                                  |
| 475721 | LOC475721 | similar to CG5913-PA                                                                                                                |
| 607948 | LOC607948 | similar to THO complex subunit 4 (Tho4) (Ally of AML-1 and LEF-1) (Transcriptional coactivator Aly/REF) (bZIP enhancing factor BEF) |
| 475429 | METAP2    | methionyl aminopeptidase 2                                                                                                          |
| 483399 | PKP3      | plakophilin 3                                                                                                                       |
| 477871 | MCM4      | minichromosome maintenance complex component 4                                                                                      |
| 485806 | SNRNPB    | small nuclear ribonucleoprotein polypeptides B and B1                                                                               |
| 477879 | TCEA1     | transcription elongation factor A (SII), 1                                                                                          |
| 477887 | RPS20     | ribosomal protein S20                                                                                                               |
| 477757 | HNRNPF    | heterogeneous nuclear ribonucleoprotein F                                                                                           |
| 477601 | KRT18     | keratin 18                                                                                                                          |
| 486513 | KRT8      | keratin 8                                                                                                                           |
| 477602 | KRT7      | keratin 7                                                                                                                           |
| 609784 | VAMP8     | vesicle-associated membrane protein 8 (endobrevin)                                                                                  |
| 478864 | LOC478864 | similar to 60S ribosomal protein L21                                                                                                |
| 477309 | LOC477309 | similar to Transcription factor BTF3 homolog 3                                                                                      |
| 478254 | LOC478254 | similar to CG5913-PA                                                                                                                |
| 477224 | CTNBL1    | catenin, beta like 1                                                                                                                |
| 488448 | GLS       | glutaminase                                                                                                                         |
| 488207 | DSP       | desmoplakin                                                                                                                         |
| 487314 | KPNA6     | karyopherin alpha 6 (importin alpha 7)                                                                                              |
| 475816 | SEC22B    | SEC22 vesicle trafficking protein homolog B ( <i>S. cerevisiae</i> ) (gene/pseudogene)                                              |
| 478504 | PAPSS1    | 3'-phosphoadenosine 5'-phosphosulfate synthase 1                                                                                    |
| 480311 | RPL36AL   | ribosomal protein L36a-like                                                                                                         |
| 478642 | FXR1      | fragile X mental retardation, autosomal homolog 1                                                                                   |
| 476855 | PRPS2     | phosphoribosyl pyrophosphate synthetase 2                                                                                           |
| 442955 | EPB41     | erythrocyte membrane protein band 4.1 (elliptocytosis 1, RH-linked)                                                                 |
| 480472 | DDX5      | DEAD (Asp-Glu-Ala-Asp) box polypeptide 5                                                                                            |
| 478165 | ATPIF1    | ATPase inhibitory factor 1                                                                                                          |
| 610764 | CAMK2D    | calcium/calmodulin-dependent protein kinase II delta                                                                                |
| 475838 | GOLPH3L   | golgi phosphoprotein 3-like                                                                                                         |
| 477274 | VAPB      | VAMP (vesicle-associated membrane protein)-associated protein B and C                                                               |
| 479071 | LOC479071 | similar to Probable ATP-dependent RNA helicase DDX6 (DEAD-box protein 6) (ATP-dependent RNA helicase p54) (Oncogene RCK)            |
| 477856 | ACADSB    | acyl-CoA dehydrogenase, short/branched chain                                                                                        |
| 485959 | RPS21     | ribosomal protein S21                                                                                                               |
| 486663 | STRAP     | serine/threonine kinase receptor associated protein                                                                                 |

|        |           |                                                                           |
|--------|-----------|---------------------------------------------------------------------------|
| 477857 | BUB3      | budding uninhibited by benzimidazoles 3 homolog (yeast)                   |
| 477431 | HDLBP     | high density lipoprotein binding protein                                  |
| 611715 | EIF1AX    | eukaryotic translation initiation factor 1A, X-linked                     |
| 479230 | CCAR1     | cell division cycle and apoptosis regulator 1                             |
| 480306 | FKBP3     | FK506 binding protein 3, 25kDa                                            |
| 479237 | SAR1A     | SAR1 homolog A ( <i>S. cerevisiae</i> )                                   |
| 480886 | DDX3X     | DEAD (Asp-Glu-Ala-Asp) box polypeptide 3, X-linked                        |
| 479733 | GNB2      | guanine nucleotide binding protein (G protein), beta polypeptide 2        |
| 478831 | ZC3H15    | zinc finger CCCH-type containing 15                                       |
| 476663 | COPE      | coatamer protein complex, subunit epsilon                                 |
| 479969 | LOC479969 | similar to Protein C14orf166                                              |
| 477714 | CHD4      | chromodomain helicase DNA binding protein 4                               |
| 490966 | PTRF      | polymerase I and transcript release factor                                |
| 480332 | KTN1      | kinectin 1 (kinesin receptor)                                             |
| 478918 | TUBA4A    | tubulin, alpha 4a                                                         |
| 610636 | TUBA3C    | tubulin, alpha 3c                                                         |
| 489450 | C1QBP     | complement component 1, q subcomponent binding protein                    |
| 476053 | HNRNPUL2  | heterogeneous nuclear ribonucleoprotein U-like 2                          |
| 607852 | ACLY      | ATP citrate lyase                                                         |
| 480100 | HNRNPU    | heterogeneous nuclear ribonucleoprotein U (scaffold attachment factor A)  |
| 480522 | JUP       | junction plakoglobin                                                      |
| 489468 | EIF5A     | eukaryotic translation initiation factor 5A                               |
| 403682 | RPL19     | ribosomal protein L19                                                     |
| 488856 | DHX15     | DEAH (Asp-Glu-Ala-His) box polypeptide 15                                 |
| 403683 | RPL23     | ribosomal protein L23                                                     |
| 490754 | SRSF5     | serine/arginine-rich splicing factor 5                                    |
| 403435 | ANXA2     | annexin A2                                                                |
| 479282 | NOP16     | NOP16 nucleolar protein homolog (yeast)                                   |
| 480124 | LMNA      | lamin A/C                                                                 |
| 475722 | LOC475722 | similar to nucleophosmin 1                                                |
| 490449 | RPS27     | ribosomal protein S27                                                     |
| 480578 | CLTC      | clathrin, heavy chain (Hc)                                                |
| 484949 | DNM2      | dynamin 2                                                                 |
| 479322 | G3BP1     | GTPase activating protein (SH3 domain) binding protein 1                  |
| 403690 | RPS14     | ribosomal protein S14                                                     |
| 480440 | TNFAIP2   | tumor necrosis factor, alpha-induced protein 2                            |
| 480442 | EIF5      | eukaryotic translation initiation factor 5                                |
| 480193 | MYL12B    | myosin, light chain 12B, regulatory                                       |
| 479535 | SERBP1    | SERPINE1 mRNA binding protein 1                                           |
| 476799 | RPL23A    | ribosomal protein L23a                                                    |
| 485028 | SAFB      | scaffold attachment factor B                                              |
| 480213 | TUBB6     | tubulin, beta 6                                                           |
| 481079 | NSDHL     | NAD(P) dependent steroid dehydrogenase-like                               |
| 489591 | CDK11A    | cyclin-dependent kinase 11A                                               |
| 492246 | HCFC1     | host cell factor C1 (VP16-accessory protein)                              |
| 491231 | TUBB2C    | tubulin, beta 2C                                                          |
| 480674 | EDF1      | endothelial differentiation-related factor 1                              |
| 479949 | RPL5      | ribosomal protein L5                                                      |
| 479666 | AP1G1     | adaptor-related protein complex 1, gamma 1 subunit                        |
| 489733 | NOB1      | NIN1/RPN12 binding protein 1 homolog ( <i>S. cerevisiae</i> )             |
| 489738 | CIRH1A    | cirrhosis, autosomal recessive 1A (cirhin)                                |
| 475851 | S100A10   | S100 calcium binding protein A10                                          |
| 480818 | GNB2L1    | guanine nucleotide binding protein (G protein), beta polypeptide 2-like 1 |
| 487554 | TMOD3     | tropomodulin 3 (ubiquitous)                                               |



## Cluster 4

### Enriched Terms:

| Gene to GO BP<br>Conditional test for over-<br>representation<br>GOBPID | Pvalue | OddsRatio | ExpCount | Count | Size | Term                                                    |
|-------------------------------------------------------------------------|--------|-----------|----------|-------|------|---------------------------------------------------------|
| GO:0071824                                                              | 0      | 5,528     | 4        | 15    | 35   | protein-DNA complex subunit organization                |
| GO:0006334                                                              | 0      | 6,35      | 4        | 13    | 28   | nucleosome assembly                                     |
| GO:0046942                                                              | 0      | 5,836     | 3        | 12    | 27   | carboxylic acid transport                               |
| GO:0006333                                                              | 0      | 4,409     | 5        | 15    | 40   | chromatin assembly or disassembly                       |
| GO:0055085                                                              | 0      | 3,545     | 7        | 18    | 57   | transmembrane transport                                 |
| GO:0006323                                                              | 0      | 3,663     | 6        | 15    | 45   | DNA packaging                                           |
| GO:0006200                                                              | 0      | 10,051    | 2        | 7     | 12   | ATP catabolic process                                   |
| GO:0006172                                                              | 0      | Inf       | 1        | 4     | 4    | ADP biosynthetic process                                |
| GO:0009136                                                              | 0      | Inf       | 1        | 4     | 4    | purine nucleoside diphosphate biosynthetic process      |
| GO:0009188                                                              | 0      | Inf       | 1        | 4     | 4    | ribonucleoside diphosphate biosynthetic process         |
| GO:0006820                                                              | 0      | 7,374     | 2        | 8     | 16   | anion transport                                         |
| GO:0022904                                                              | 0      | 5,168     | 3        | 10    | 24   | respiratory electron transport chain                    |
| GO:0009206                                                              | 0      | 4,153     | 4        | 12    | 33   | purine ribonucleoside triphosphate biosynthetic process |
| GO:0015992                                                              | 0      | 5,409     | 3        | 9     | 21   | proton transport                                        |
| GO:0015711                                                              | 0      | 10,728    | 1        | 6     | 10   | organic anion transport                                 |
| GO:0051234                                                              | 0,001  | 1,627     | 73       | 96    | 585  | establishment of localization                           |
| GO:0006839                                                              | 0,001  | 3,787     | 4        | 12    | 35   | mitochondrial transport                                 |
| GO:0009142                                                              | 0,001  | 3,787     | 4        | 12    | 35   | nucleoside triphosphate biosynthetic process            |
| GO:0015980                                                              | 0,001  | 3,002     | 7        | 16    | 55   | energy derivation by oxidation of organic compounds     |
| GO:0008203                                                              | 0,001  | 5,751     | 2        | 8     | 18   | cholesterol metabolic process                           |
| GO:0034220                                                              | 0,001  | 3,982     | 4        | 11    | 31   | ion transmembrane transport                             |
| GO:0009179                                                              | 0,001  | 28,414    | 1        | 4     | 5    | purine ribonucleoside diphosphate metabolic process     |
| GO:0019233                                                              | 0,001  | 28,414    | 1        | 4     | 5    | sensory perception of pain                              |
| GO:0033555                                                              | 0,001  | 11,876    | 1        | 5     | 8    | multicellular organismal response to stress             |
| GO:0040008                                                              | 0,001  | 1,861     | 25       | 40    | 203  | regulation of growth                                    |
| GO:0040010                                                              | 0,002  | 1,98      | 19       | 31    | 148  | positive regulation of growth rate                      |
| GO:0009853                                                              | 0,002  | Inf       | 0        | 3     | 3    | photorespiration                                        |
| GO:0015800                                                              | 0,002  | 8,902     | 1        | 5     | 9    | acidic amino acid transport                             |
| GO:0006119                                                              | 0,003  | 4,416     | 3        | 8     | 21   | oxidative phosphorylation                               |
| GO:0051240                                                              | 0,003  | 2,748     | 6        | 14    | 51   | positive regulation of multicellular organismal process |

|            |       |        |    |    |     |                                                     |
|------------|-------|--------|----|----|-----|-----------------------------------------------------|
| GO:0015986 | 0,003 | 5,01   | 2  | 7  | 17  | ATP synthesis coupled proton transport              |
| GO:0014911 | 0,003 | 14,198 | 1  | 4  | 6   | positive regulation of smooth muscle cell migration |
| GO:0015837 | 0,003 | 3,806  | 3  | 9  | 26  | amine transport                                     |
| GO:0030001 | 0,004 | 3,101  | 5  | 11 | 37  | metal ion transport                                 |
| GO:0030155 | 0,004 | 4,552  | 2  | 7  | 18  | regulation of cell adhesion                         |
| GO:0006816 | 0,005 | 3,822  | 3  | 8  | 23  | calcium ion transport                               |
| GO:0007568 | 0,006 | 1,961  | 14 | 24 | 114 | aging                                               |
| GO:0019915 | 0,006 | 4,17   | 2  | 7  | 19  | lipid storage                                       |
| GO:0006814 | 0,006 | 9,46   | 1  | 4  | 7   | sodium ion transport                                |
| GO:0019218 | 0,006 | 9,46   | 1  | 4  | 7   | regulation of steroid metabolic process             |
| GO:0051276 | 0,007 | 1,99   | 13 | 22 | 103 | chromosome organization                             |
| GO:0009199 | 0,007 | 2,54   | 6  | 13 | 50  | ribonucleoside triphosphate metabolic process       |
| GO:0016126 | 0,007 | 4,754  | 2  | 6  | 15  | sterol biosynthetic process                         |
| GO:0001662 | 0,007 | 21,219 | 1  | 3  | 4   | behavioral fear response                            |
| GO:0006971 | 0,007 | 21,219 | 1  | 3  | 4   | hypotonic response                                  |
| GO:0046513 | 0,007 | 21,219 | 1  | 3  | 4   | ceramide biosynthetic process                       |
| GO:0001817 | 0,007 | 5,927  | 1  | 5  | 11  | regulation of cytokine production                   |
| GO:0008610 | 0,008 | 2,234  | 9  | 16 | 68  | lipid biosynthetic process                          |
| GO:0022610 | 0,008 | 2,234  | 9  | 16 | 68  | biological adhesion                                 |
| GO:0009144 | 0,008 | 2,471  | 6  | 13 | 51  | purine nucleoside triphosphate metabolic process    |
| GO:0016049 | 0,008 | 2,874  | 4  | 10 | 35  | cell growth                                         |
| GO:0006812 | 0,009 | 3,752  | 3  | 7  | 21  | cation transport                                    |

### Genes in cluster:

| Entrey Id | Symbol    | description                                                                           |
|-----------|-----------|---------------------------------------------------------------------------------------|
| 476186    | LMAN1     | lectin, mannose-binding, 1                                                            |
| 474397    | ESYT1     | extended synaptotagmin-like protein 1                                                 |
| 403669    | ATP5B     | ATP synthase, H <sup>+</sup> transporting, mitochondrial F1 complex, beta polypeptide |
| 474630    | HSD17B4   | hydroxysteroid (17-beta) dehydrogenase 4                                              |
| 483987    | STX7      | syntaxin 7                                                                            |
| 607458    | SHMT2     | serine hydroxymethyltransferase 2 (mitochondrial)                                     |
| 481436    | TMED7     | transmembrane emp24 protein transport domain containing 7                             |
| 474644    | NHP2      | NHP2 ribonucleoprotein homolog (yeast)                                                |
| 481455    | HNRNPH1   | heterogeneous nuclear ribonucleoprotein H1 (H)                                        |
| 403908    | CANX      | calnexin                                                                              |
| 608981    | RAP1B     | RAP1B, member of RAS oncogene family                                                  |
| 474448    | TSPAN8    | tetraspanin 8                                                                         |
| 481991    | LOC481991 | similar to small nuclear ribonucleoprotein D2                                         |
| 474475    | TSPO      | translocator protein (18kDa)                                                          |
| 474479    | CYB5R3    | cytochrome b5 reductase 3                                                             |
| 474681    | VDAC1     | voltage-dependent anion channel 1                                                     |
| 403935    | ANXA13    | annexin A13                                                                           |
| 608021    | SQLE      | squalene epoxidase                                                                    |
| 481514    | H2AFY     | H2A histone family, member Y                                                          |
| 481746    | ITPR3     | inositol 1,4,5-trisphosphate receptor, type 3                                         |
| 474697    | HSPA9     | heat shock 70kDa protein 9 (mortalin)                                                 |

|               |           |                                                                                                                                               |
|---------------|-----------|-----------------------------------------------------------------------------------------------------------------------------------------------|
| <b>476303</b> | GOLM1     | golgi membrane protein 1                                                                                                                      |
| <b>610117</b> | TOMM22    | translocase of outer mitochondrial membrane 22 homolog (yeast)                                                                                |
| <b>482252</b> | PODXL     | podocalyxin-like                                                                                                                              |
| <b>403687</b> | SRSF3     | serine/arginine-rich splicing factor 3                                                                                                        |
| <b>475121</b> | LOC475121 | similar to cytochrome c-1                                                                                                                     |
| <b>609079</b> | TOMM6     | translocase of outer mitochondrial membrane 6 homolog (yeast)                                                                                 |
| <b>474526</b> | PWP1      | PWP1 homolog ( <i>S. cerevisiae</i> )                                                                                                         |
| <b>612937</b> | TMEM33    | transmembrane protein 33                                                                                                                      |
| <b>475225</b> | LOC475225 | similar to Cytochrome P450 51A1 (CYPLI) (P450LI) (Sterol 14-alpha demethylase) (Lanosterol 14-alpha demethylase) (LDM) (P450-14DM) (P45014DM) |
| <b>476333</b> | DOCK8     | dedicator of cytokinesis 8                                                                                                                    |
| <b>475140</b> | OCIAD1    | OCIA domain containing 1                                                                                                                      |
| <b>474755</b> | STOML2    | stomatin (EPB72)-like 2                                                                                                                       |
| <b>484192</b> | SPTLC1    | serine palmitoyltransferase, long chain base subunit 1                                                                                        |
| <b>610138</b> | SLC25A13  | solute carrier family 25, member 13 (citrin)                                                                                                  |
| <b>474567</b> | COX5B     | cytochrome c oxidase polypeptide Vb                                                                                                           |
| <b>474572</b> | LRPPRC    | leucine-rich PPR-motif containing                                                                                                             |
| <b>481360</b> | EPCAM     | epithelial cell adhesion molecule                                                                                                             |
| <b>611134</b> | LOC611134 | similar to cytochrome c oxidase, subunit 7a 3                                                                                                 |
| <b>474598</b> | RTN4      | reticulon 4                                                                                                                                   |
| <b>474978</b> | BCKDHB    | branched chain keto acid dehydrogenase E1, beta polypeptide                                                                                   |
| <b>484356</b> | LOC484356 | hypothetical LOC484356                                                                                                                        |
| <b>482460</b> | ZMPSTE24  | zinc metalloproteinase (STE24 homolog, <i>S. cerevisiae</i> )                                                                                 |
| <b>482464</b> | PABPC4    | poly(A) binding protein, cytoplasmic 4 (inducible form)                                                                                       |
| <b>475501</b> | LOC475501 | similar to H2A histone family, member V isoform 5                                                                                             |
| <b>482691</b> | TBRG4     | transforming growth factor beta regulator 4                                                                                                   |
| <b>403774</b> | RAB1A     | RAB1A, member RAS oncogene family                                                                                                             |
| <b>481418</b> | PCYOX1    | prenylcysteine oxidase 1                                                                                                                      |
| <b>403980</b> | CAV1      | caveolin 1, caveolae protein, 22kDa                                                                                                           |
| <b>482966</b> | NOL10     | nucleolar protein 10                                                                                                                          |
| <b>404017</b> | SEC61G    | Sec61 gamma subunit                                                                                                                           |
| <b>612336</b> | LOC612336 | similar to Protein FAM3C precursor (Protein GS3786)                                                                                           |
| <b>475875</b> | RALA      | v-ral simian leukemia viral oncogene homolog A (ras related)                                                                                  |
| <b>476413</b> | RRAS      | related RAS viral (r-ras) oncogene homolog                                                                                                    |
| <b>474818</b> | RAB14     | RAB14, member RAS oncogene family                                                                                                             |
| <b>612719</b> | STOM      | stomatin                                                                                                                                      |
| <b>477956</b> | ITGB1     | integrin, beta 1 (fibronectin receptor, beta polypeptide, antigen CD29 includes MDF2, MSK12)                                                  |
| <b>476084</b> | PGRMC2    | progesterone receptor membrane component 2                                                                                                    |
| <b>475524</b> | LOC475524 | similar to single-stranded DNA binding protein 1 isoform 1                                                                                    |
| <b>482764</b> | AGK       | acylglycerol kinase                                                                                                                           |
| <b>475029</b> | RPF2      | ribosome production factor 2 homolog ( <i>S. cerevisiae</i> )                                                                                 |
| <b>485119</b> | ENDOD1    | endonuclease domain containing 1                                                                                                              |
| <b>476516</b> | RPN1      | ribophorin I                                                                                                                                  |
| <b>404007</b> | RAB7A     | RAB7A, member RAS oncogene family                                                                                                             |
| <b>484425</b> | SLC1A5    | solute carrier family 1 (neutral amino acid transporter), member 5                                                                            |
| <b>403958</b> | RAB10     | RAB10, member RAS oncogene family                                                                                                             |
| <b>476101</b> | UGGT1     | UDP-glucose glycoprotein glucosyltransferase 1                                                                                                |
| <b>475687</b> | HADHA     | hydroxyacyl-CoA dehydrogenase/3-ketoacyl-CoA thiolase/enoyl-CoA hydratase (trifunctional protein), alpha subunit                              |
| <b>476519</b> | ACAD9     | acyl-CoA dehydrogenase family, member 9                                                                                                       |
| <b>477002</b> | ACSS1     | acyl-CoA synthetase short-chain family member 1                                                                                               |
| <b>477988</b> | YME1L1    | YME1-like 1 ( <i>S. cerevisiae</i> )                                                                                                          |
| <b>484637</b> | TMEM43    | transmembrane protein 43                                                                                                                      |



|               |           |                                                                                                                  |
|---------------|-----------|------------------------------------------------------------------------------------------------------------------|
| <b>485448</b> | SUCLA2    | succinate-CoA ligase, ADP-forming, beta subunit                                                                  |
| <b>611055</b> | TOMM40    | translocase of outer mitochondrial membrane 40 homolog (yeast)                                                   |
| <b>474433</b> | LOC474433 | similar to ATP synthase, H <sup>+</sup> transporting, mitochondrial F <sub>0</sub> complex, subunit d isoform a  |
| <b>476794</b> | NDUFC2    | NADH dehydrogenase (ubiquinone) 1, subcomplex unknown, 2, 14.5kDa                                                |
| <b>483318</b> | ITGB4     | integrin, beta 4                                                                                                 |
| <b>475916</b> | H3F3B     | H3 histone, family 3B (H3.3B)                                                                                    |
| <b>484473</b> | CEACAM28  | carcinoembryonic antigen-related cell adhesion molecule 28                                                       |
| <b>478009</b> | ATP5C1    | ATP synthase, H <sup>+</sup> transporting, mitochondrial F <sub>1</sub> complex, gamma polypeptide 1             |
| <b>476130</b> | UBXN4     | UBX domain protein 4                                                                                             |
| <b>612817</b> | SRSF2     | serine/arginine-rich splicing factor 2                                                                           |
| <b>477032</b> | CTNNB1    | catenin (cadherin-associated protein), beta 1, 88kDa                                                             |
| <b>482533</b> | ELOVL1    | ELOVL fatty acid elongase 1                                                                                      |
| <b>485187</b> | SERPINH1  | serpin peptidase inhibitor, clade H (heat shock protein 47), member 1, (collagen binding protein 1)              |
| <b>476461</b> | TIMM50    | translocase of inner mitochondrial membrane 50 homolog ( <i>S. cerevisiae</i> )                                  |
| <b>475462</b> | VDAC3     | voltage-dependent anion channel 3                                                                                |
| <b>612874</b> | SUPT16H   | suppressor of Ty 16 homolog ( <i>S. cerevisiae</i> )                                                             |
| <b>608330</b> | RAB6A     | RAB6A, member RAS oncogene family                                                                                |
| <b>485637</b> | SLC4A7    | solute carrier family 4, sodium bicarbonate cotransporter, member 7                                              |
| <b>612944</b> | ARL8B     | ADP-ribosylation factor-like 8B                                                                                  |
| <b>608030</b> | MRPL12    | mitochondrial ribosomal protein L12                                                                              |
| <b>607518</b> | ERLIN2    | ER lipid raft associated 2                                                                                       |
| <b>475593</b> | MAK16     | MAK16 homolog ( <i>S. cerevisiae</i> )                                                                           |
| <b>477175</b> | MRPS26    | mitochondrial ribosomal protein S26                                                                              |
| <b>477072</b> | TF        | transferrin                                                                                                      |
| <b>476559</b> | ARL6IP5   | ADP-ribosylation-like factor 6 interacting protein 5                                                             |
| <b>475436</b> | SLC25A3   | solute carrier family 25 (mitochondrial carrier; phosphate carrier), member 3                                    |
| <b>475939</b> | HSD17B12  | hydroxysteroid (17-beta) dehydrogenase 12                                                                        |
| <b>486776</b> | TIMM23    | translocase of inner mitochondrial membrane 23 homolog (yeast)                                                   |
| <b>612644</b> | LOC612644 | similar to cytochrome c oxidase, subunit VIb polypeptide 1                                                       |
| <b>403474</b> | CAT       | catalase                                                                                                         |
| <b>477185</b> | CSNK2A1   | casein kinase 2, alpha 1 polypeptide                                                                             |
| <b>431686</b> | ATP4A     | ATPase, H <sup>+</sup> /K <sup>+</sup> exchanging, alpha polypeptide                                             |
| <b>404009</b> | RAB2A     | RAB2A, member RAS oncogene family                                                                                |
| <b>486970</b> | YTHDF3    | YTH domain family, member 3                                                                                      |
| <b>486978</b> | RRS1      | RRS1 ribosome biogenesis regulator homolog ( <i>S. cerevisiae</i> )                                              |
| <b>479137</b> | REEP5     | receptor accessory protein 5                                                                                     |
| <b>477347</b> | PSPC1     | paraspeckle component 1                                                                                          |
| <b>475764</b> | IMMT      | inner membrane protein, mitochondrial                                                                            |
| <b>475630</b> | SLC25A4   | solute carrier family 25 (mitochondrial carrier; adenine nucleotide translocator), member 4                      |
| <b>477088</b> | COPB2     | coatamer protein complex, subunit beta 2 (beta prime)                                                            |
| <b>477098</b> | ATP1B3    | ATPase, Na <sup>+</sup> /K <sup>+</sup> transporting, beta 3 polypeptide                                         |
| <b>607472</b> | MYOF      | myoferlin                                                                                                        |
| <b>483489</b> | CTNND1    | catenin (cadherin-associated protein), delta 1                                                                   |
| <b>607299</b> | NOP10     | NOP10 ribonucleoprotein homolog (yeast)                                                                          |
| <b>477362</b> | FDFT1     | farnesyl-diphosphate farnesyltransferase 1                                                                       |
| <b>477103</b> | U2SURP    | U2 snRNP-associated SURP domain containing                                                                       |
| <b>477210</b> | EIF6      | eukaryotic translation initiation factor 6                                                                       |
| <b>476372</b> | LOC476372 | similar to ATP synthase, H <sup>+</sup> transporting, mitochondrial F <sub>0</sub> complex, subunit f, isoform 2 |
| <b>475978</b> | NDUFS3    | NADH dehydrogenase (ubiquinone) Fe-S protein 3, 30kDa (NADH-coenzyme Q reductase)                                |
| <b>403878</b> | ATP2A2    | ATPase, Ca <sup>++</sup> transporting, cardiac muscle, slow twitch 2                                             |

|               |           |                                                                                                              |
|---------------|-----------|--------------------------------------------------------------------------------------------------------------|
| <b>475979</b> | CELF1     | CUGBP, Elav-like family member 1                                                                             |
| <b>475480</b> | ETFDH     | electron-transferring-flavoprotein dehydrogenase                                                             |
| <b>477223</b> | RPN2      | ribophorin II                                                                                                |
| <b>612786</b> | TM9SF3    | transmembrane 9 superfamily member 3                                                                         |
| <b>608951</b> | FKBP11    | FK506 binding protein 11, 19 kDa                                                                             |
| <b>477124</b> | SSR3      | signal sequence receptor, gamma (translocon-associated protein gamma)                                        |
| <b>608725</b> | RRP12     | ribosomal RNA processing 12 homolog ( <i>S. cerevisiae</i> )                                                 |
| <b>479172</b> | SCAMP1    | secretory carrier membrane protein 1                                                                         |
| <b>478059</b> | LOC478059 | similar to F26E4.12                                                                                          |
| <b>478755</b> | GPD2      | glycerol-3-phosphate dehydrogenase 2 (mitochondrial)                                                         |
| <b>488199</b> | PRPF4B    | PRP4 pre-mRNA processing factor 4 homolog B (yeast)                                                          |
| <b>403951</b> | SSR1      | signal sequence receptor, alpha                                                                              |
| <b>478410</b> | LOC478410 | similar to ATP synthase O subunit, mitochondrial precursor (Oligomycin sensitivity conferral protein) (OSCP) |
| <b>403992</b> | ATP1A1    | ATPase, Na <sup>+</sup> /K <sup>+</sup> transporting, alpha 1 polypeptide                                    |
| <b>486848</b> | SFXN3     | sideroflexin 3                                                                                               |
| <b>478552</b> | CD47      | CD47 molecule                                                                                                |
| <b>488289</b> | LOC488289 | similar to Histone H2A.1                                                                                     |
| <b>442957</b> | GNAI2     | guanine nucleotide binding protein (G protein), alpha inhibiting activity polypeptide 2                      |
| <b>403583</b> | CPT1A     | carnitine palmitoyltransferase 1A (liver)                                                                    |
| <b>610084</b> | CISD2     | CDGSH iron sulfur domain 2                                                                                   |
| <b>486308</b> | TRPV4     | transient receptor potential cation channel, subfamily V, member 4                                           |
| <b>488456</b> | SF3B1     | splicing factor 3b, subunit 1, 155kDa                                                                        |
| <b>479192</b> | HEATR1    | HEAT repeat containing 1                                                                                     |
| <b>488264</b> | LOC488264 | similar to Histone H1.2 (H1d)                                                                                |
| <b>477660</b> | MRPS35    | mitochondrial ribosomal protein S35                                                                          |
| <b>480830</b> | SLC25A6   | solute carrier family 25 (mitochondrial carrier; adenine nucleotide translocator), member 6                  |
| <b>483166</b> | LOC483166 | similar to germinal histone H4 gene                                                                          |
| <b>476004</b> | NDUFV1    | NADH dehydrogenase (ubiquinone) flavoprotein 1, 51kDa                                                        |
| <b>486317</b> | DAO       | D-amino-acid oxidase                                                                                         |
| <b>611089</b> | LOC611089 | similar to H2B histone family, member F                                                                      |
| <b>483175</b> | LOC483175 | similar to histone H2A                                                                                       |
| <b>477264</b> | DPM1      | dolichyl-phosphate mannosyltransferase polypeptide 1, catalytic subunit                                      |
| <b>477841</b> | TIAL1     | TIA1 cytotoxic granule-associated RNA binding protein-like 1                                                 |
| <b>479212</b> | CISD1     | CDGSH iron sulfur domain 1                                                                                   |
| <b>489372</b> | LOC489372 | similar to Histone H2A.x (H2a/x)                                                                             |
| <b>608244</b> | NDUFA10   | NADH dehydrogenase (ubiquinone) 1 alpha subcomplex, 10, 42kDa                                                |
| <b>478974</b> | F11R      | F11 receptor                                                                                                 |
| <b>476012</b> | MRPL11    | mitochondrial ribosomal protein L11                                                                          |
| <b>478798</b> | SLC25A12  | solute carrier family 25 (mitochondrial carrier, Aralar), member 12                                          |
| <b>403703</b> | TFRC      | transferrin receptor (p90, CD71)                                                                             |
| <b>611961</b> | BANF1     | barrier to autointegration factor 1                                                                          |
| <b>480032</b> | DHX9      | DEAH (Asp-Glu-Ala-His) box polypeptide 9                                                                     |
| <b>478192</b> | HNRNPR    | heterogeneous nuclear ribonucleoprotein R                                                                    |
| <b>478880</b> | NDUFS1    | NADH dehydrogenase (ubiquinone) Fe-S protein 1, 75kDa (NADH-coenzyme Q reductase)                            |
| <b>478663</b> | TRA2B     | transformer 2 beta homolog ( <i>Drosophila</i> )                                                             |
| <b>403728</b> | ZONAB     | Y-box protein ZONAB-A                                                                                        |
| <b>480866</b> | EIF2S3    | eukaryotic translation initiation factor 2, subunit 3 gamma, 52kDa                                           |
| <b>477695</b> | LOC477695 | similar to mago-nashi homolog                                                                                |
| <b>489816</b> | POR       | P450 (cytochrome) oxidoreductase                                                                             |
| <b>478992</b> | TMCO1     | transmembrane and coiled-coil domains 1                                                                      |
| <b>488421</b> | AGPS      | alkylglycerone phosphate synthase                                                                            |

|               |           |                                                                                                                                                                                 |
|---------------|-----------|---------------------------------------------------------------------------------------------------------------------------------------------------------------------------------|
| <b>491408</b> | RAB18     | RAB18, member RAS oncogene family                                                                                                                                               |
| <b>476891</b> | DDX21     | DEAD (Asp-Glu-Ala-Asp) box polypeptide 21                                                                                                                                       |
| <b>479728</b> | FIS1      | fission 1 (mitochondrial outer membrane) homolog ( <i>S. cerevisiae</i> )                                                                                                       |
| <b>477700</b> | M6PR      | mannose-6-phosphate receptor (cation dependent)                                                                                                                                 |
| <b>483747</b> | MRPL49    | mitochondrial ribosomal protein L49                                                                                                                                             |
| <b>489406</b> | DLAT      | dihydrolipoamide S-acetyltransferase                                                                                                                                            |
| <b>476659</b> | NDUFA13   | NADH dehydrogenase (ubiquinone) 1 alpha subcomplex, 13                                                                                                                          |
| <b>489042</b> | MCU       | mitochondrial calcium uniporter                                                                                                                                                 |
| <b>488437</b> | ITGAV     | integrin, alpha V (vitronectin receptor, alpha polypeptide, antigen CD51)                                                                                                       |
| <b>610791</b> | TMX1      | thioredoxin-related transmembrane protein 1                                                                                                                                     |
| <b>488807</b> | LETM1     | leucine zipper-EF-hand containing transmembrane protein 1                                                                                                                       |
| <b>404012</b> | DDOST     | dolichyl-diphosphooligosaccharide--protein glycosyltransferase                                                                                                                  |
| <b>476043</b> | RTN3      | reticulon 3                                                                                                                                                                     |
| <b>476044</b> | ATL3      | atlastin GTPase 3                                                                                                                                                               |
| <b>487406</b> | MRTO4     | mRNA turnover 4 homolog ( <i>S. cerevisiae</i> )                                                                                                                                |
| <b>611024</b> | LOC611024 | similar to 3-beta-hydroxysteroid-delta(8),delta(7)-isomerase (Cholesterol delta-isomerase) (Delta8-delta7 sterol isomerase) (D8-D7 sterol isomerase) (Emopamil-binding protein) |
| <b>612432</b> | LOC612432 | similar to CG2943-PA                                                                                                                                                            |
| <b>403966</b> | ATP1B1    | ATPase, Na <sup>+</sup> /K <sup>+</sup> transporting, beta 1 polypeptide                                                                                                        |
| <b>489442</b> | MYBBP1A   | MYB binding protein (P160) 1a                                                                                                                                                   |
| <b>477718</b> | NDUFA9    | NADH dehydrogenase (ubiquinone) 1 alpha subcomplex, 9, 39kDa                                                                                                                    |
| <b>480086</b> | BRP44     | brain protein 44                                                                                                                                                                |
| <b>479255</b> | VDAC2     | voltage-dependent anion channel 2                                                                                                                                               |
| <b>483777</b> | SLC3A2    | solute carrier family 3 (activators of dibasic and neutral amino acid transport), member 2                                                                                      |
| <b>607694</b> | CNP       | 2',3'-cyclic nucleotide 3' phosphodiesterase                                                                                                                                    |
| <b>403773</b> | RAB8A     | RAB8A, member RAS oncogene family                                                                                                                                               |
| <b>478217</b> | SDHB      | succinate dehydrogenase complex, subunit B, iron sulfur (lp)                                                                                                                    |
| <b>479470</b> | SLC25A11  | solute carrier family 25 (mitochondrial carrier; oxoglutarate carrier), member 11                                                                                               |
| <b>479261</b> | LOC479261 | similar to R53.5                                                                                                                                                                |
| <b>403423</b> | RBM47     | RNA binding motif protein 47                                                                                                                                                    |
| <b>489463</b> | ACADVL    | acyl-CoA dehydrogenase, very long chain                                                                                                                                         |
| <b>490385</b> | PARP1     | poly (ADP-ribose) polymerase 1                                                                                                                                                  |
| <b>480928</b> | SMC1A     | structural maintenance of chromosomes 1A                                                                                                                                        |
| <b>489477</b> | MPDU1     | mannose-P-dolichol utilization defect 1                                                                                                                                         |
| <b>606860</b> | LOC606860 | similar to Cytochrome c oxidase polypeptide VIc-2                                                                                                                               |
| <b>489102</b> | FAF2      | Fas associated factor family member 2                                                                                                                                           |
| <b>489109</b> | SFXN1     | sideroflexin 1                                                                                                                                                                  |
| <b>479778</b> | LOC479778 | similar to fusion (involved in t(12;16) in malignant liposarcoma) (predicted)                                                                                                   |
| <b>480547</b> | PHB       | prohibitin                                                                                                                                                                      |
| <b>480127</b> | DAP3      | death associated protein 3                                                                                                                                                      |
| <b>491074</b> | LOC491074 | similar to integrin alpha 3 isoform b, precursor                                                                                                                                |
| <b>480388</b> | DLST      | dihydrolipoamide S-succinyltransferase (E2 component of 2-oxo-glutarate complex)                                                                                                |
| <b>610559</b> | TMED10    | transmembrane emp24-like trafficking protein 10 (yeast)                                                                                                                         |
| <b>491080</b> | LOC491080 | similar to CG3408-PA                                                                                                                                                            |
| <b>478337</b> | PPIB      | peptidylprolyl isomerase B (cyclophilin B)                                                                                                                                      |
| <b>480403</b> | SPTLC2    | serine palmitoyltransferase, long chain base subunit 2                                                                                                                          |
| <b>491103</b> | TRIM25    | tripartite motif containing 25                                                                                                                                                  |
| <b>475148</b> | MSI2      | musashi homolog 2 ( <i>Drosophila</i> )                                                                                                                                         |
| <b>609693</b> | SRSF1     | serine/arginine-rich splicing factor 1                                                                                                                                          |
| <b>490458</b> | LOC490458 | similar to S100 calcium binding protein A16                                                                                                                                     |
| <b>480149</b> | ATP5A1    | ATP synthase, H <sup>+</sup> transporting, mitochondrial F1 complex, alpha subunit 1, cardiac muscle                                                                            |

|               |           |                                                                                                                                |
|---------------|-----------|--------------------------------------------------------------------------------------------------------------------------------|
| <b>479815</b> | UQCRC2    | ubiquinol-cytochrome c reductase core protein II                                                                               |
| <b>478370</b> | LOC478370 | similar to Cytochrome c oxidase polypeptide Va, mitochondrial precursor                                                        |
| <b>481018</b> | ACSL4     | acyl-CoA synthetase long-chain family member 4                                                                                 |
| <b>610134</b> | ETFFA     | electron-transfer-flavoprotein, alpha polypeptide                                                                              |
| <b>489992</b> | NOMO2     | NODAL modulator 2                                                                                                              |
| <b>490532</b> | YES1      | v-yes-1 Yamaguchi sarcoma viral oncogene homolog 1                                                                             |
| <b>481029</b> | PGRMC1    | progesterone receptor membrane component 1                                                                                     |
| <b>489208</b> | ITGA2     | integrin, alpha 2 (CD49B, alpha 2 subunit of VLA-2 receptor)                                                                   |
| <b>480204</b> | NDUFV2    | NADH dehydrogenase (ubiquinone) flavoprotein 2, 24kDa                                                                          |
| <b>480208</b> | VAPA      | VAMP (vesicle-associated membrane protein)-associated protein A, 33kDa                                                         |
| <b>481048</b> | AIFM1     | apoptosis-inducing factor, mitochondrion-associated, 1                                                                         |
| <b>480626</b> | SDF2      | stromal cell-derived factor 2                                                                                                  |
| <b>479365</b> | LOC479365 | similar to Brix domain containing protein 2 (Ribosome biogenesis protein Brix)                                                 |
| <b>489573</b> | DHCR24    | 24-dehydrocholesterol reductase                                                                                                |
| <b>481073</b> | HMGB3     | high mobility group box 3                                                                                                      |
| <b>480646</b> | MYO1C     | myosin IC                                                                                                                      |
| <b>479864</b> | HMOX2     | heme oxygenase (decycling) 2                                                                                                   |
| <b>480651</b> | PRPF8     | PRP8 pre-mRNA processing factor 8 homolog (S. cerevisiae)                                                                      |
| <b>481080</b> | BCAP31    | B-cell receptor-associated protein 31                                                                                          |
| <b>479568</b> | ATAD3B    | ATPase family, AAA domain containing 3B                                                                                        |
| <b>485062</b> | NCLN      | nicalin                                                                                                                        |
| <b>481082</b> | SSR4      | signal sequence receptor, delta                                                                                                |
| <b>491203</b> | LOC491203 | similar to Putative eukaryotic translation initiation factor 3 subunit (eIF-3)                                                 |
| <b>492244</b> | L1CAM     | L1 cell adhesion molecule                                                                                                      |
| <b>476756</b> | ATP5D     | ATP synthase, H+ transporting, mitochondrial F1 complex, delta subunit                                                         |
| <b>612784</b> | DNAJC11   | DnaJ (Hsp40) homolog, subfamily C, member 11                                                                                   |
| <b>476758</b> | LOC476758 | similar to basigin isoform 1                                                                                                   |
| <b>479901</b> | ATP5F1    | ATP synthase, H+ transporting, mitochondrial Fo complex, subunit B1                                                            |
| <b>479623</b> | LOC479623 | similar to Cytochrome c oxidase subunit IV isoform 1, mitochondrial precursor (COX IV-1) (Cytochrome c oxidase polypeptide IV) |
| <b>611922</b> | SLC25A24  | solute carrier family 25 (mitochondrial carrier; phosphate carrier), member 24                                                 |
| <b>479633</b> | GCSH      | glycine cleavage system protein H (aminomethyl carrier)                                                                        |
| <b>490153</b> | F3        | coagulation factor III (thromboplastin, tissue factor)                                                                         |
| <b>479939</b> | ABCD3     | ATP-binding cassette, sub-family D (ALD), member 3                                                                             |
| <b>612406</b> | ZNF326    | zinc finger protein 326                                                                                                        |
| <b>610942</b> | LOC610942 | similar to cytochrome b5 outer mitochondrial membrane precursor                                                                |
| <b>483035</b> | CEBPZ     | CCAAT/enhancer binding protein (C/EBP), zeta                                                                                   |
| <b>608348</b> | SLC25A1   | solute carrier family 25 (mitochondrial carrier; citrate transporter), member 1                                                |
| <b>488273</b> | LOC488273 | similar to Histone H1.5 (Histone H1a)                                                                                          |
| <b>488258</b> | LOC488258 | similar to Histone H1.2 (H1d)                                                                                                  |
| <b>483167</b> | LOC483167 | similar to H3 histone, family 2 isoform 2                                                                                      |
| <b>483168</b> | LOC483168 | similar to Histone H2A.o (H2A/o) (H2A.2) (H2a-615)                                                                             |
| <b>475214</b> | NDUFA5    | NADH dehydrogenase (ubiquinone) 1 alpha subcomplex, 5, 13kDa                                                                   |
| <b>608656</b> | LOC608656 | similar to oxoglutarate (alpha-ketoglutarate) dehydrogenase (lipoamide) isoform 1 precursor                                    |
| <b>610569</b> | RPS27L    | ribosomal protein S27-like                                                                                                     |

## Cluster 5

### Enriched Terms:

| Gene to GO BP<br>Conditional test for over-representation<br>GOBPID | Pvalue | OddsRatio | ExpCount | Count | Size | Term                                                                                         |
|---------------------------------------------------------------------|--------|-----------|----------|-------|------|----------------------------------------------------------------------------------------------|
| GO:0043436                                                          | 0      | 2,601     | 13       | 28    | 181  | oxoacid metabolic process                                                                    |
| GO:0055114                                                          | 0      | 2,555     | 13       | 26    | 169  | oxidation-reduction process                                                                  |
| GO:0006105                                                          | 0      | 25,632    | 0        | 4     | 6    | succinate metabolic process                                                                  |
| GO:0002520                                                          | 0,001  | 3,102     | 6        | 15    | 80   | immune system development                                                                    |
| GO:0048878                                                          | 0,001  | 3,005     | 6        | 15    | 82   | chemical homeostasis                                                                         |
| GO:0040027                                                          | 0,001  | 17,078    | 1        | 4     | 7    | negative regulation of vulval development                                                    |
| GO:0061062                                                          | 0,001  | 17,078    | 1        | 4     | 7    | regulation of nematode larval development                                                    |
| GO:0043648                                                          | 0,001  | 6,658     | 1        | 6     | 18   | dicarboxylic acid metabolic process                                                          |
| GO:0065008                                                          | 0,001  | 1,917     | 24       | 38    | 322  | regulation of biological quality                                                             |
| GO:0032496                                                          | 0,002  | 5,05      | 2        | 7     | 25   | response to lipopolysaccharide                                                               |
| GO:0032787                                                          | 0,002  | 2,783     | 6        | 14    | 81   | monocarboxylic acid metabolic process                                                        |
| GO:0006084                                                          | 0,002  | 4,781     | 2        | 7     | 26   | acetyl-CoA metabolic process                                                                 |
| GO:0051186                                                          | 0,005  | 2,679     | 5        | 12    | 71   | cofactor metabolic process                                                                   |
| GO:0045454                                                          | 0,005  | 4,551     | 2        | 6     | 23   | cell redox homeostasis                                                                       |
| GO:0050804                                                          | 0,005  | 4,551     | 2        | 6     | 23   | regulation of synaptic transmission                                                          |
| GO:0001837                                                          | 0,005  | Inf       | 0        | 2     | 2    | epithelial to mesenchymal transition                                                         |
| GO:0048147                                                          | 0,005  | Inf       | 0        | 2     | 2    | negative regulation of fibroblast proliferation                                              |
| GO:0051588                                                          | 0,005  | Inf       | 0        | 2     | 2    | regulation of neurotransmitter transport                                                     |
| GO:2000300                                                          | 0,005  | Inf       | 0        | 2     | 2    | regulation of synaptic vesicle exocytosis                                                    |
| GO:0007399                                                          | 0,006  | 1,867     | 17       | 27    | 225  | nervous system development                                                                   |
| GO:0006091                                                          | 0,006  | 2,486     | 6        | 13    | 82   | generation of precursor metabolites and energy                                               |
| GO:0006457                                                          | 0,006  | 2,722     | 5        | 11    | 64   | protein folding                                                                              |
| GO:0030097                                                          | 0,006  | 2,588     | 5        | 12    | 73   | hemopoiesis                                                                                  |
| GO:0006099                                                          | 0,006  | 5,349     | 1        | 5     | 17   | tricarboxylic acid cycle                                                                     |
| GO:0030866                                                          | 0,006  | 7,303     | 1        | 4     | 11   | cortical actin cytoskeleton organization                                                     |
| GO:0048581                                                          | 0,006  | 7,303     | 1        | 4     | 11   | negative regulation of post-embryonic development                                            |
| GO:0022904                                                          | 0,007  | 4,296     | 2        | 6     | 24   | respiratory electron transport chain                                                         |
| GO:0002562                                                          | 0,007  | 12,715    | 0        | 3     | 6    | somatic diversification of immune receptors via germline recombination within a single locus |
| GO:0006664                                                          | 0,007  | 12,715    | 0        | 3     | 6    | glycolipid metabolic process                                                                 |
| GO:0055072                                                          | 0,007  | 12,715    | 0        | 3     | 6    | iron ion homeostasis                                                                         |
| GO:0008406                                                          | 0,008  | 4,068     | 2        | 6     | 25   | gonad development                                                                            |
| GO:0045333                                                          | 0,009  | 4,743     | 1        | 5     | 19   | cellular respiration                                                                         |
| GO:0006873                                                          | 0,01   | 2,525     | 5        | 11    | 68   | cellular ion homeostasis                                                                     |

### Genes in cluster:

| Entrez Id | Symbol | description      |
|-----------|--------|------------------|
| 474403    | CS     | citrate synthase |

|        |           |                                                                                                        |
|--------|-----------|--------------------------------------------------------------------------------------------------------|
| 607115 | CNPY2     | canopy 2 homolog (zebrafish)                                                                           |
| 610360 | FECH      | ferrochelatase                                                                                         |
| 476198 | ME2       | malic enzyme 2, NAD(+)-dependent, mitochondrial                                                        |
| 481134 | TSFM      | Ts translation elongation factor, mitochondrial                                                        |
| 442965 | UTRN      | utrophin                                                                                               |
| 476245 | MTHFD1L   | methylenetetrahydrofolate dehydrogenase (NADP+ dependent) 1-like                                       |
| 481489 | PRRC1     | proline-rich coiled-coil 1                                                                             |
| 476258 | SOD2      | superoxide dismutase 2, mitochondrial                                                                  |
| 607061 | TRABD     | TraB domain containing                                                                                 |
| 474473 | SAMM50    | sorting and assembly machinery component 50 homolog (S. cerevisiae)                                    |
| 481226 | NAGA      | N-acetylgalactosaminidase, alpha-                                                                      |
| 481234 | CHADL     | chondroadherin-like                                                                                    |
| 481524 | HNRNPA0   | heterogeneous nuclear ribonucleoprotein A0                                                             |
| 474700 | MATR3     | matrin 3                                                                                               |
| 475201 | CALU      | calumenin                                                                                              |
| 608746 | TOM1      | target of myb1 (chicken)                                                                               |
| 481576 | ACO1      | aconitase 1, soluble                                                                                   |
| 481582 | NOL6      | nucleolar protein family 6 (RNA-associated)                                                            |
| 484188 | ERMP1     | endoplasmic reticulum metallopeptidase 1                                                               |
| 403689 | TRIM28    | tripartite motif containing 28                                                                         |
| 482343 | MACC1     | metastasis associated in colon cancer 1                                                                |
| 404018 | SEC61B    | Sec61 beta subunit                                                                                     |
| 481884 | MYO6      | myosin VI                                                                                              |
| 482355 | GNPMB     | glycoprotein (transmembrane) nmb                                                                       |
| 481376 | PNPT1     | polyribonucleotide nucleotidyltransferase 1                                                            |
| 479610 | HIBADH    | 3-hydroxyisobutyrate dehydrogenase                                                                     |
| 403550 | ALB       | albumin                                                                                                |
| 610135 | LOC610135 | similar to small nuclear ribonucleoprotein polypeptide G                                               |
| 503863 | CAPZA2    | capping protein (actin filament) muscle Z-line, alpha 2                                                |
| 475668 | PDIA6     | protein disulfide isomerase family A, member 6                                                         |
| 475518 | GSTK1     | glutathione S-transferase kappa 1                                                                      |
| 484388 | SNRNP70   | small nuclear ribonucleoprotein 70kDa (U1)                                                             |
| 403978 | DLD       | dihydrolipoamide dehydrogenase                                                                         |
| 403523 | BAX       | BCL2-associated X protein                                                                              |
| 484391 | NUCB1     | nucleobindin 1                                                                                         |
| 484417 | EHD2      | EH-domain containing 2                                                                                 |
| 612960 | NAPA      | N-ethylmaleimide-sensitive factor attachment protein, alpha                                            |
| 476773 | CHORDC1   | cysteine and histidine-rich domain (CHORD) containing 1                                                |
| 475374 | LOC475374 | similar to Alcohol dehydrogenase [NADP+] (Aldehyde reductase) (Aldo-keto reductase family 1 member A1) |
| 477023 | ACAA1     | acetyl-CoA acyltransferase 1                                                                           |
| 485604 | ENTPD3    | ectonucleoside triphosphate diphosphohydrolase 3                                                       |
| 475713 | WDR43     | WD repeat domain 43                                                                                    |
| 476152 | PRPF40A   | PRP40 pre-mRNA processing factor 40 homolog A (S. cerevisiae)                                          |
| 483369 | P4HB      | prolyl 4-hydroxylase, beta polypeptide                                                                 |
| 477294 | MRPS31    | mitochondrial ribosomal protein S31                                                                    |
| 475730 | SRSF7     | serine/arginine-rich splicing factor 7                                                                 |
| 482609 | SNRPF     | small nuclear ribonucleoprotein polypeptide F                                                          |
| 476831 | PRKCDBP   | protein kinase C, delta binding protein                                                                |
| 482618 | TMPO      | thymopoietin                                                                                           |
| 403170 | HMGB1     | high mobility group box 1                                                                              |
| 476562 | SUCLG2    | succinate-CoA ligase, GDP-forming, beta subunit                                                        |
| 475742 | SNRNP200  | small nuclear ribonucleoprotein 200kDa (U5)                                                            |
| 477597 | PFDN5     | prefoldin subunit 5                                                                                    |
| 476574 | PDHB      | pyruvate dehydrogenase (lipoamide) beta                                                                |

|        |           |                                                                                                                                                                          |
|--------|-----------|--------------------------------------------------------------------------------------------------------------------------------------------------------------------------|
| 485385 | SWAP70    | SWAP switching B-cell complex 70kDa subunit                                                                                                                              |
| 404019 | HSP90B1   | heat shock protein 90kDa beta (Grp94), member 1                                                                                                                          |
| 488888 | LOC488888 | hypothetical LOC488888                                                                                                                                                   |
| 476503 | LOC476503 | similar to ubiquinol-cytochrome c reductase, Rieske iron-sulfur polypeptide 1                                                                                            |
| 486068 | HMGB2     | high mobility group box 2                                                                                                                                                |
| 475775 | SUCLG1    | succinate-CoA ligase, alpha subunit                                                                                                                                      |
| 477781 | ALDH18A1  | aldehyde dehydrogenase 18 family, member A1                                                                                                                              |
| 477482 | ERP29     | endoplasmic reticulum protein 29                                                                                                                                         |
| 477488 | PTPN11    | protein tyrosine phosphatase, non-receptor type 11                                                                                                                       |
| 487050 | CDH17     | cadherin 17, LI cadherin (liver-intestine)                                                                                                                               |
| 607040 | HIBCH     | 3-hydroxyisobutyryl-CoA hydrolase                                                                                                                                        |
| 478934 | SNRPE     | small nuclear ribonucleoprotein polypeptide E                                                                                                                            |
| 479700 | GBAS      | glioblastoma amplified sequence                                                                                                                                          |
| 608421 | MANF      | mesencephalic astrocyte-derived neurotrophic factor                                                                                                                      |
| 488246 | ALDH5A1   | aldehyde dehydrogenase 5 family, member A1                                                                                                                               |
| 610883 | ACOT13    | acyl-CoA thioesterase 13                                                                                                                                                 |
| 489293 | SRPR      | signal recognition particle receptor (docking protein)                                                                                                                   |
| 490236 | RNPEP     | arginyl aminopeptidase (aminopeptidase B)                                                                                                                                |
| 403739 | COL17A1   | collagen, type XVII, alpha 1                                                                                                                                             |
| 403486 | PPP3CA    | protein phosphatase 3, catalytic subunit, alpha isozyme                                                                                                                  |
| 607017 | SBDS      | Shwachman-Bodian-Diamond syndrome                                                                                                                                        |
| 478854 | HSPD1     | heat shock 60kDa protein 1 (chaperonin)                                                                                                                                  |
| 478855 | LOC478855 | similar to heat shock 10kDa protein 1 (chaperonin 10)                                                                                                                    |
| 487993 | POGLUT1   | protein O-glycosyltransferase 1                                                                                                                                          |
| 478634 | SDHA      | succinate dehydrogenase complex, subunit A, flavoprotein (Fp)                                                                                                            |
| 478963 | IARS2     | isoleucyl-tRNA synthetase 2, mitochondrial                                                                                                                               |
| 478506 | HADH      | hydroxyacyl-CoA dehydrogenase                                                                                                                                            |
| 479714 | GTF2I     | general transcription factor Iii                                                                                                                                         |
| 480255 | PCK2      | phosphoenolpyruvate carboxykinase 2 (mitochondrial)                                                                                                                      |
| 479043 | IDH2      | isocitrate dehydrogenase 2 (NADP+), mitochondrial                                                                                                                        |
| 477839 | LOC477839 | similar to Thioredoxin-dependent peroxide reductase, mitochondrial precursor (Peroxiredoxin 3) (Antioxidant protein 1) (AOP-1) (MER5 protein homolog) (HBC189) (PRX III) |
| 479410 | HYOU1     | hypoxia up-regulated 1                                                                                                                                                   |
| 480971 | LOC480971 | similar to Ewing sarcoma breakpoint region 1 isoform EWS                                                                                                                 |
| 477686 | EPS8      | epidermal growth factor receptor pathway substrate 8                                                                                                                     |
| 488648 | PFDN2     | prefoldin subunit 2                                                                                                                                                      |
| 488664 | UAP1      | UDP-N-acetylglucosamine pyrophosphorylase 1                                                                                                                              |
| 478279 | PDIA3     | protein disulfide isomerase family A, member 3                                                                                                                           |
| 491776 | PRDX4     | peroxiredoxin 4                                                                                                                                                          |
| 480864 | ACOT9     | acyl-CoA thioesterase 9                                                                                                                                                  |
| 607482 | BCR       | breakpoint cluster region                                                                                                                                                |
| 477554 | LOC477554 | similar to small nuclear ribonucleoprotein D3                                                                                                                            |
| 403907 | PNN       | pinin, desmosome associated protein                                                                                                                                      |
| 491830 | MID1IP1   | MID1 interacting protein 1 (gastrulation specific G12 homolog (zebrafish))                                                                                               |
| 490935 | EFTUD2    | elongation factor Tu GTP binding domain containing 2                                                                                                                     |
| 479446 | RDX       | radixin                                                                                                                                                                  |
| 489421 | ACAT1     | acetyl-CoA acetyltransferase 1                                                                                                                                           |
| 403934 | CDC42     | cell division cycle 42 (GTP binding protein, 25kDa)                                                                                                                      |
| 490691 | ERO1L     | ERO1-like (S. cerevisiae)                                                                                                                                                |
| 607705 | ATP6V0A1  | ATPase, H+ transporting, lysosomal V0 subunit a1                                                                                                                         |
| 477715 | NCAPD2    | non-SMC condensin I complex, subunit D2                                                                                                                                  |
| 478210 | AKR7A2    | aldo-keto reductase family 7, member A2 (aflatoxin aldehyde reductase)                                                                                                   |
| 490967 | STAT3     | signal transducer and activator of transcription 3 (acute-phase response factor)                                                                                         |
| 483780 | NXF1      | nuclear RNA export factor 1                                                                                                                                              |
| 403941 | RAB5C     | RAB5C, member RAS oncogene family                                                                                                                                        |

|               |           |                                                                                         |
|---------------|-----------|-----------------------------------------------------------------------------------------|
| <b>479752</b> | AIMP2     | aminoacyl tRNA synthetase complex-interacting multifunctional protein 2                 |
| <b>480092</b> | FH        | fumarate hydratase                                                                      |
| <b>483784</b> | GANAB     | glucosidase, alpha; neutral AB                                                          |
| <b>490975</b> | FKBP10    | FK506 binding protein 10, 65 kDa                                                        |
| <b>403674</b> | EIF1      | eukaryotic translation initiation factor 1                                              |
| <b>487421</b> | EPHA2     | EPH receptor A2                                                                         |
| <b>480112</b> | PYCR2     | pyrroline-5-carboxylate reductase family, member 2                                      |
| <b>479116</b> | PGM2      | phosphoglucomutase 2                                                                    |
| <b>480930</b> | HSD17B10  | hydroxysteroid (17-beta) dehydrogenase 10                                               |
| <b>480130</b> | MTX1      | metaxin 1                                                                               |
| <b>490789</b> | EIF2B2    | eukaryotic translation initiation factor 2B, subunit 2 beta, 39kDa                      |
| <b>476694</b> | CALR      | calreticulin                                                                            |
| <b>476699</b> | ASNA1     | arsA arsenite transporter, ATP-binding, homolog 1 (bacterial)                           |
| <b>479796</b> | TUFM      | Tu translation elongation factor, mitochondrial                                         |
| <b>490810</b> | LOC490810 | similar to CG33071-PC, isoform C                                                        |
| <b>479313</b> | CLINT1    | clathrin interactor 1                                                                   |
| <b>484941</b> | PRKCSH    | protein kinase C substrate 80K-H                                                        |
| <b>476708</b> | RAB3D     | RAB3D, member RAS oncogene family                                                       |
| <b>479805</b> | NDUFAB1   | NADH dehydrogenase (ubiquinone) 1, alpha/beta subcomplex, 1, 8kDa                       |
| <b>611211</b> | AP1M2     | adaptor-related protein complex 1, mu 2 subunit                                         |
| <b>490500</b> | DSG2      | desmoglein 2                                                                            |
| <b>480605</b> | AP2B1     | adaptor-related protein complex 2, beta 1 subunit                                       |
| <b>480178</b> | SNRPD1    | small nuclear ribonucleoprotein D1 polypeptide 16kDa                                    |
| <b>479331</b> | CSNK1A1   | casein kinase 1, alpha 1                                                                |
| <b>491142</b> | NLE1      | notchless homolog 1 (Drosophila)                                                        |
| <b>403880</b> | STXBP2    | syntaxin binding protein 2                                                              |
| <b>485005</b> | TIMM44    | translocase of inner mitochondrial membrane 44 homolog (yeast)                          |
| <b>481037</b> | LAMP2     | lysosomal-associated membrane protein 2                                                 |
| <b>481038</b> | MCTS1     | malignant T cell amplified sequence 1                                                   |
| <b>611425</b> | LONP1     | lon peptidase 1, mitochondrial                                                          |
| <b>480635</b> | BLMH      | bleomycin hydrolase                                                                     |
| <b>489585</b> | CPT2      | carnitine palmitoyltransferase 2                                                        |
| <b>479564</b> | SCP2      | sterol carrier protein 2                                                                |
| <b>479880</b> | RNPS1     | RNA binding protein S1, serine-rich domain                                              |
| <b>611859</b> | POLR2E    | polymerase (RNA) II (DNA directed) polypeptide E, 25kDa                                 |
| <b>480677</b> | PMPCA     | peptidase (mitochondrial processing) alpha                                              |
| <b>611810</b> | GNAI3     | guanine nucleotide binding protein (G protein), alpha inhibiting activity polypeptide 3 |
| <b>479659</b> | SF3B3     | splicing factor 3b, subunit 3, 130kDa                                                   |
| <b>480726</b> | HSPA5     | heat shock 70kDa protein 5 (glucose-regulated protein, 78kDa)                           |
| <b>479685</b> | ATP6V0D1  | ATPase, H+ transporting, lysosomal 38kDa, V0 subunit d1                                 |
| <b>490679</b> | ARF6      | ADP-ribosylation factor 6                                                               |
| <b>488269</b> | LOC488269 | similar to Histone H1.4 (Histone H1b)                                                   |
| <b>476018</b> | DRAP1     | DR1-associated protein 1 (negative cofactor 2 alpha)                                    |



## Cluster 6

### Enriched Terms:

| Gene to GO BP<br>Conditional test<br>for over-<br>representation<br>GOBPID | Pvalue | OddsRatio | ExpCount | Count | Size | Term                                                       |
|----------------------------------------------------------------------------|--------|-----------|----------|-------|------|------------------------------------------------------------|
| GO:0006414                                                                 | 0      | 23,644    | 7        | 48    | 79   | translational elongation                                   |
| GO:0009059                                                                 | 0      | 7,008     | 16       | 57    | 211  | macromolecule biosynthetic process                         |
| GO:0000022                                                                 | 0      | 14,465    | 3        | 20    | 37   | mitotic spindle elongation                                 |
| GO:0044260                                                                 | 0      | 3,342     | 71       | 112   | 857  | cellular macromolecule metabolic process                   |
| GO:0044249                                                                 | 0      | 3,437     | 28       | 59    | 361  | cellular biosynthetic process                              |
| GO:0019538                                                                 | 0      | 2,864     | 50       | 86    | 589  | protein metabolic process                                  |
| GO:0071843                                                                 | 0      | 5,065     | 8        | 27    | 94   | cellular component biogenesis at cellular level            |
| GO:0006364                                                                 | 0      | 7,713     | 3        | 15    | 38   | rRNA processing                                            |
| GO:0007051                                                                 | 0      | 4,144     | 8        | 24    | 95   | spindle organization                                       |
| GO:0006396                                                                 | 0      | 2,627     | 18       | 36    | 209  | RNA processing                                             |
| GO:0007017                                                                 | 0      | 2,835     | 13       | 28    | 149  | microtubule-based process                                  |
| GO:0043487                                                                 | 0      | 13,202    | 1        | 7     | 13   | regulation of RNA stability                                |
| GO:0042254                                                                 | 0      | 8,336     | 2        | 8     | 20   | ribosome biogenesis                                        |
| GO:0008152                                                                 | 0      | 2,178     | 112      | 132   | 1326 | metabolic process                                          |
| GO:0048255                                                                 | 0      | 13,498    | 1        | 6     | 11   | mRNA stabilization                                         |
| GO:0070925                                                                 | 0      | 7,567     | 2        | 8     | 20   | organelle assembly                                         |
| GO:0042273                                                                 | 0      | 11,242    | 1        | 6     | 12   | ribosomal large subunit biogenesis                         |
| GO:0034660                                                                 | 0      | 3,161     | 6        | 16    | 75   | ncRNA metabolic process                                    |
| GO:0000028                                                                 | 0,001  | 22,245    | 1        | 4     | 6    | ribosomal small subunit assembly                           |
| GO:0006417                                                                 | 0,001  | 4,07      | 3        | 10    | 38   | regulation of translation                                  |
| GO:0090304                                                                 | 0,001  | 1,751     | 39       | 56    | 465  | nucleic acid metabolic process                             |
| GO:0010556                                                                 | 0,001  | 2,103     | 15       | 27    | 180  | regulation of macromolecule biosynthetic process           |
| GO:0022403                                                                 | 0,002  | 2,13      | 14       | 25    | 164  | cell cycle phase                                           |
| GO:0031326                                                                 | 0,002  | 1,965     | 17       | 29    | 205  | regulation of cellular biosynthetic process                |
| GO:0007010                                                                 | 0,004  | 1,88      | 19       | 30    | 220  | cytoskeleton organization                                  |
| GO:0010468                                                                 | 0,004  | 1,821     | 21       | 33    | 250  | regulation of gene expression                              |
| GO:0071826                                                                 | 0,004  | 3,392     | 3        | 9     | 39   | ribonucleoprotein complex subunit organization             |
| GO:0000291                                                                 | 0,007  | Inf       | 0        | 2     | 2    | nuclear-transcribed mRNA catabolic process, exonucleolytic |
| GO:0006412                                                                 | 0,007  | 2,63      | 5        | 11    | 83   | translation                                                |
| GO:0006402                                                                 | 0,008  | 5,062     | 1        | 5     | 16   | mRNA catabolic process                                     |
| GO:0042157                                                                 | 0,01   | 11,045    | 1        | 3     | 6    | lipoprotein metabolic process                              |

### Genes in cluster:

| Entrez Id | Symbol    | description                                                                     |
|-----------|-----------|---------------------------------------------------------------------------------|
| 478509    | LOC478509 | similar to ribosomal protein L34                                                |
| 490572    | LOC490572 | similar to myosin, light polypeptide 6, alkali, smooth muscle and non-muscle    |
| 474830    | TUBB      | tubulin, beta                                                                   |
| 612751    | PABPC1    | poly(A) binding protein, cytoplasmic 1                                          |
| 476328    | LOC476328 | similar to 60S ribosomal protein L29 (Cell surface heparin binding protein HIP) |
| 474672    | P4HA2     | prolyl 4-hydroxylase, alpha polypeptide II                                      |

|        |           |                                                                                                                                                   |
|--------|-----------|---------------------------------------------------------------------------------------------------------------------------------------------------|
| 403685 | RPS18     | ribosomal protein S18                                                                                                                             |
| 609684 | LOC609684 | similar to breast cancer membrane protein 101                                                                                                     |
| 474877 | LOC474877 | similar to 40S ribosomal protein S10                                                                                                              |
| 481774 | LOC481774 | similar to U1 small nuclear ribonucleoprotein C (U1 snRNP protein C) (U1C protein) (U1-C)                                                         |
| 607574 | CHCHD3    | coiled-coil-helix-coiled-coil-helix domain containing 3                                                                                           |
| 474698 | LOC474698 | similar to catenin (cadherin-associated protein), alpha 1, 102kDa                                                                                 |
| 474656 | LOC474656 | similar to ribosomal protein L10a                                                                                                                 |
| 474504 | LOC474504 | similar to 60S ribosomal protein L3 (L4)                                                                                                          |
| 474887 | SRPK1     | SRSF protein kinase 1                                                                                                                             |
| 482266 | FLNC      | filamin C, gamma                                                                                                                                  |
| 475203 | RBM28     | RNA binding motif protein 28                                                                                                                      |
| 475130 | RPL8      | ribosomal protein L8                                                                                                                              |
| 474524 | LOC474524 | similar to CG9987-PA                                                                                                                              |
| 403855 | PON2      | paraoxonase 2                                                                                                                                     |
| 481543 | LOC481543 | similar to ribosomal protein L31                                                                                                                  |
| 476366 | RPS5      | ribosomal protein S5                                                                                                                              |
| 482437 | SLC2A1    | solute carrier family 2 (facilitated glucose transporter), member 1                                                                               |
| 476387 | RPS9      | ribosomal protein S9                                                                                                                              |
| 479350 | LOC479350 | similar to ribosomal protein L37                                                                                                                  |
| 403684 | RPS11     | ribosomal protein S11                                                                                                                             |
| 442938 | FLT3LG    | fms-related tyrosine kinase 3 ligand                                                                                                              |
| 476422 | RPL18     | ribosomal protein L18                                                                                                                             |
| 475889 | SYPL1     | synaptophysin-like 1                                                                                                                              |
| 484627 | LOC484627 | similar to H1 histone family, member X                                                                                                            |
| 608089 | LOC608089 | similar to Adipocyte plasma membrane-associated protein (BSCv protein)                                                                            |
| 476780 | PICALM    | phosphatidylinositol binding clathrin assembly protein                                                                                            |
| 476523 | MRPS25    | mitochondrial ribosomal protein S25                                                                                                               |
| 475381 | RPS8      | ribosomal protein S8                                                                                                                              |
| 475410 | LOC475410 | similar to 60S ribosomal protein L32                                                                                                              |
| 476120 | DDX18     | DEAD (Asp-Glu-Ala-Asp) box polypeptide 18                                                                                                         |
| 476450 | RPS19     | ribosomal protein S19                                                                                                                             |
| 477031 | LOC477031 | similar to ribosomal protein L14                                                                                                                  |
| 478018 | PITRM1    | pitrilysin metalloproteinase 1                                                                                                                    |
| 476804 | RPS3      | ribosomal protein S3                                                                                                                              |
| 485628 | STT3B     | STT3, subunit of the oligosaccharyltransferase complex, homolog B ( <i>S. cerevisiae</i> )                                                        |
| 476463 | RPS16     | ribosomal protein S16                                                                                                                             |
| 478021 | GTPBP4    | GTP binding protein 4                                                                                                                             |
| 475922 | EIF4A3    | eukaryotic translation initiation factor 4A3                                                                                                      |
| 476466 | HNRNPL    | heterogeneous nuclear ribonucleoprotein L                                                                                                         |
| 477046 | RPL15     | ribosomal protein L15                                                                                                                             |
| 483038 | CYP1B1    | cytochrome P450, family 1, subfamily B, polypeptide 1                                                                                             |
| 475044 | LOC475044 | similar to Heterogeneous nuclear ribonucleoprotein A1 (Helix-destabilizing protein) (Single-strand binding protein) (hnRNP core protein A1) (HDP) |
| 612871 | NOP56     | NOP56 ribonucleoprotein homolog (yeast)                                                                                                           |
| 475942 | PDHX      | pyruvate dehydrogenase complex, component X                                                                                                       |
| 476842 | LOC476842 | similar to ribosomal protein L27a                                                                                                                 |
| 607420 | CAPRIN1   | cell cycle associated protein 1                                                                                                                   |
| 477760 | BMS1      | BMS1 homolog, ribosome assembly protein (yeast)                                                                                                   |
| 478067 | NDUFAF2   | NADH dehydrogenase (ubiquinone) 1 alpha subcomplex, assembly factor 2                                                                             |
| 486246 | DDX55     | DEAD (Asp-Glu-Ala-Asp) box polypeptide 55                                                                                                         |
| 485845 | RALY      | RNA binding protein, autoantigenic (hnRNP-associated with lethal yellow homolog (mouse))                                                          |
| 477197 | EIF2S2    | eukaryotic translation initiation factor 2, subunit 2 beta, 38kDa                                                                                 |
| 403677 | RPS3A     | ribosomal protein S3A                                                                                                                             |
| 477912 | RPL7      | ribosomal protein L7                                                                                                                              |
| 479257 | LOC479257 | similar to ribosomal protein S24 isoform 3                                                                                                        |

|        |           |                                                                                                                             |
|--------|-----------|-----------------------------------------------------------------------------------------------------------------------------|
| 442971 | CLU       | clusterin                                                                                                                   |
| 477112 | EIF2A     | eukaryotic translation initiation factor 2A, 65kDa                                                                          |
| 612261 | MRPL53    | mitochondrial ribosomal protein L53                                                                                         |
| 608138 | TUBA1C    | tubulin, alpha 1c                                                                                                           |
| 479159 | RPS23     | ribosomal protein S23                                                                                                       |
| 480235 | LOC480235 | similar to ribosomal protein S13                                                                                            |
| 487034 | CPNE3     | copine III                                                                                                                  |
| 403691 | RPL6      | Ribosomal protein L6                                                                                                        |
| 476976 | HNRPDL    | heterogeneous nuclear ribonucleoprotein D-like                                                                              |
| 486112 | STC1      | stanniocalcin 1                                                                                                             |
| 488443 | WDR75     | WD repeat domain 75                                                                                                         |
| 478701 | TUBB2A    | tubulin, beta 2A                                                                                                            |
| 477944 | LOC477944 | similar to ubiquinol-cytochrome c reductase binding protein                                                                 |
| 475805 | BCAS2     | breast carcinoma amplified sequence 2                                                                                       |
| 475991 | RPLP2     | ribosomal protein, large, P2                                                                                                |
| 478547 | RPL24     | ribosomal protein L24                                                                                                       |
| 475807 | CSDE1     | cold shock domain containing E1, RNA-binding                                                                                |
| 477801 | NPM3      | nucleophosmin/nucleoplasmin 3                                                                                               |
| 479011 | YBX1      | Y box binding protein 1                                                                                                     |
| 477505 | GCN1L1    | GCN1 general control of amino-acid synthesis 1-like 1 (yeast)                                                               |
| 477510 | SRSF9     | serine/arginine-rich splicing factor 9                                                                                      |
| 486886 | SMC3      | structural maintenance of chromosomes 3                                                                                     |
| 489300 | STT3A     | STT3, subunit of the oligosaccharyltransferase complex, homolog A ( <i>S. cerevisiae</i> )                                  |
| 608445 | NCL       | nucleolin                                                                                                                   |
| 476824 | LOC476824 | similar to NADH-ubiquinone oxidoreductase 23 kDa subunit, mitochondrial precursor (Complex I-23KD) (CI-23KD) (TYKY subunit) |
| 478158 | PUM1      | pumilio homolog 1 ( <i>Drosophila</i> )                                                                                     |
| 477258 | STAU1     | staufer, RNA binding protein, homolog 1 ( <i>Drosophila</i> )                                                               |
| 478161 | YTHDF2    | YTH domain family, member 2                                                                                                 |
| 608455 | UQCRC1    | ubiquinol-cytochrome c reductase core protein I                                                                             |
| 610648 | RBM4      | RNA binding motif protein 4                                                                                                 |
| 479412 | RPS25     | ribosomal protein S25                                                                                                       |
| 607667 | NOP58     | NOP58 ribonucleoprotein homolog (yeast)                                                                                     |
| 478876 | WDR12     | WD repeat domain 12                                                                                                         |
| 478973 | COPA      | coatamer protein complex, subunit alpha                                                                                     |
| 478597 | RPL35A    | ribosomal protein L35a                                                                                                      |
| 478981 | NDUFS2    | NADH dehydrogenase (ubiquinone) Fe-S protein 2, 49kDa (NADH-coenzyme Q reductase)                                           |
| 610762 | RAB1B     | RAB1B, member RAS oncogene family                                                                                           |
| 403681 | RPS17     | ribosomal protein S17                                                                                                       |
| 478662 | IGF2BP2   | insulin-like growth factor 2 mRNA binding protein 2                                                                         |
| 608074 | HNRNPA3   | heterogeneous nuclear ribonucleoprotein A3                                                                                  |
| 478664 | DNAJB11   | DnaJ (Hsp40) homolog, subfamily B, member 11                                                                                |
| 403788 | ITGB3     | integrin, beta 3 (platelet glycoprotein IIIa, antigen CD61)                                                                 |
| 442942 | PTGS2     | prostaglandin-endoperoxide synthase 2 (prostaglandin G/H synthase and cyclooxygenase)                                       |
| 480751 | RPL30     | ribosomal protein L30                                                                                                       |
| 480494 | NMT1      | N-myristoyltransferase 1                                                                                                    |
| 479886 | RPS2      | ribosomal protein S2                                                                                                        |
| 479234 | HK1       | hexokinase 1                                                                                                                |
| 483748 | FAU       | Finkel-Biskis-Reilly murine sarcoma virus (FBR-MuSV) ubiquitously expressed                                                 |
| 610596 | RPS29     | ribosomal protein S29                                                                                                       |
| 480503 | UBTF      | upstream binding transcription factor, RNA polymerase I                                                                     |
| 478828 | NCKAP1    | NCK-associated protein 1                                                                                                    |
| 478904 | RPL37A    | ribosomal protein L37a                                                                                                      |
| 476664 | UPF1      | UPF1 regulator of nonsense transcripts homolog (yeast)                                                                      |
| 403688 | RPL27     | ribosomal protein L27                                                                                                       |

|        |           |                                                                                                          |
|--------|-----------|----------------------------------------------------------------------------------------------------------|
| 489047 | DNAJC9    | DnaJ (Hsp40) homolog, subfamily C, member 9                                                              |
| 611645 | NOP2      | NOP2 nucleolar protein homolog (yeast)                                                                   |
| 476637 | LOC476637 | similar to ribosomal protein L18a                                                                        |
| 478213 | TAS1R2    | taste receptor, type 1, member 2                                                                         |
| 479109 | RPL9      | ribosomal protein L9                                                                                     |
| 480361 | EIF2S1    | eukaryotic translation initiation factor 2, subunit 1 alpha, 35kDa                                       |
| 478325 | MYO1E     | myosin IE                                                                                                |
| 491064 | IGF2BP1   | insulin-like growth factor 2 mRNA binding protein 1                                                      |
| 489409 | LOC489409 | similar to secretory carrier membrane protein 3 isoform 1                                                |
| 476525 | LOC476525 | similar to 60S ribosomal protein L26 (Silica-induced gene 20 protein) (SIG-20)                           |
| 607081 | LOC607081 | similar to non-POU domain containing, octamer-binding                                                    |
| 403893 | RPS4Y1    | ribosomal protein S4, Y-linked 1                                                                         |
| 478348 | LOC478348 | similar to ribosomal protein L4                                                                          |
| 480139 | ILF2      | interleukin enhancer binding factor 2, 45kDa                                                             |
| 478356 | RPLP1     | ribosomal protein, large, P1                                                                             |
| 612929 | LARP1     | La ribonucleoprotein domain family, member 1                                                             |
| 403678 | RPL7A     | Ribosomal protein L7a                                                                                    |
| 484950 | ILF3      | interleukin enhancer binding factor 3, 90kDa                                                             |
| 610121 | INTS2     | integrator complex subunit 2                                                                             |
| 610402 | HNF1B     | HNF1 homeobox B                                                                                          |
| 490868 | CDC42BPB  | CDC42 binding protein kinase beta (DMPK-like)                                                            |
| 480466 | LOC480466 | similar to ELAV-like protein 1 (Hu-antigen R) (HuR)                                                      |
| 491153 | MYO1D     | myosin ID                                                                                                |
| 492093 | SLC25A5   | solute carrier family 25 (mitochondrial carrier; adenine nucleotide translocator), member 5              |
| 485010 | RPS28     | ribosomal protein S28                                                                                    |
| 611619 | RAB11B    | RAB11B, member RAS oncogene family                                                                       |
| 479347 | OXCT1     | 3-oxoacid CoA transferase 1                                                                              |
| 479360 | NUP155    | nucleoporin 155kDa                                                                                       |
| 490560 | AFG3L2    | AFG3 ATPase family gene 3-like 2 (S. cerevisiae)                                                         |
| 479847 | RSL1D1    | ribosomal L1 domain containing 1                                                                         |
| 479283 | LOC479283 | similar to Activated RNA polymerase II transcriptional coactivator p15 (Positive cofactor 4) (PC4) (p14) |
| 475077 | RPL17     | ribosomal protein L17                                                                                    |
| 403912 | GNB1      | guanine nucleotide binding protein (G protein), beta polypeptide 1                                       |
| 479569 | MRPL20    | mitochondrial ribosomal protein L20                                                                      |
| 403914 | GNA11     | guanine nucleotide binding protein (G protein), alpha 11 (Gq class)                                      |
| 485070 | LMNB2     | lamin B2                                                                                                 |
| 490064 | TBL3      | transducin (beta)-like 3                                                                                 |
| 479887 | NDUFB10   | NADH dehydrogenase (ubiquinone) 1 beta subcomplex, 10, 22kDa                                             |
| 476755 | CIRBP     | cold inducible RNA binding protein                                                                       |
| 481085 | RPL10     | ribosomal protein L10                                                                                    |
| 479587 | RPL22     | ribosomal protein L22                                                                                    |
| 485097 | PTBP1     | polypyrimidine tract binding protein 1                                                                   |
| 608025 | TUBB3     | tubulin, beta 3                                                                                          |
| 479612 | RPL13     | ribosomal protein L13                                                                                    |
| 479929 | DBT       | dihydrolipoamide branched chain transacylase E2                                                          |
| 476346 | RPL12     | ribosomal protein L12                                                                                    |
| 479947 | TMED5     | transmembrane emp24 protein transport domain containing 5                                                |
| 480729 | RPL35     | ribosomal protein L35                                                                                    |
| 442858 | CDH1      | cadherin 1, type 1, E-cadherin (epithelial)                                                              |
| 489745 | ESRP2     | epithelial splicing regulatory protein 2                                                                 |
| 475827 | RBM8A     | RNA binding motif protein 8A                                                                             |
| 476753 | RPS15     | ribosomal protein S15                                                                                    |
| 474599 | RPS27A    | ribosomal protein S27a                                                                                   |
| 476738 | RPL36     | ribosomal protein L36                                                                                    |

|               |           |                                                                                          |
|---------------|-----------|------------------------------------------------------------------------------------------|
| <b>478450</b> | HNRNPD    | heterogeneous nuclear ribonucleoprotein D (AU-rich element RNA binding protein 1, 37kDa) |
| <b>478576</b> | LOC478576 | similar to ribosomal protein S15a                                                        |
